# Supplementary material for: Hepatic venous pressure gradient-guided laparoscopic splenectomy and pericardial devascularisation versus endoscopic therapy for secondary prophylaxis for variceal rebleeding in portal hypertension (CHESS1803): study protocol of a multicenter randomised controlled trial in China
Source: PubMed Central journal article supplement — BMJ Open. 2020 Jun 23;10(6):e030960. doi: 10.1136/bmjopen-2019-030960 (PMC7312451; doi:10.1136/bmjopen-2019-030960), 2020-06-23
Supplement: bmjopen-2019-030960.draft_revisions.pdf [file bmjopen-2019-030960.draft_revisions.pdf]

# BMJ Open

BMJ Open is committed to open peer review. As part of this commitment we make the peer review history of every article we publish publicly available.

When an article is published we post the peer reviewers' comments and the authors' responses online. We also post the versions of the paper that were used during peer review. These are the versions that the peer review comments apply to.

The versions of the paper that follow are the versions that were submitted during the peer review process. They are not the versions of record or the final published versions. They should not be cited or distributed as the published version of this manuscript.

BMJ Open is an open access journal and the full, final, typeset and author-corrected version of record of the manuscript is available on our site with no access controls, subscription charges or pay-per-view fees (<http://bmjopen.bmj.com>).

If you have any questions on BMJ Open's open peer review process please email [info.bmjopen@bmj.com](mailto:info.bmjopen@bmj.com)

# BMJ Open

## Hepatic venous pressure gradient guided laparoscopic versus endoscopic therapy for variceal rebleeding in portal hypertension (CHESS1803): Study protocol of a multicenter randomized controlled trial

|                               |                                                                                                                                                                                                                                                                                                                                                                                                                                                                                                                                                                                                                                                                                                                                                                                                                                                                                                                                                                                                                                                                                                                                                                                                                                                                                                                                                                                                                                                                |
|-------------------------------|----------------------------------------------------------------------------------------------------------------------------------------------------------------------------------------------------------------------------------------------------------------------------------------------------------------------------------------------------------------------------------------------------------------------------------------------------------------------------------------------------------------------------------------------------------------------------------------------------------------------------------------------------------------------------------------------------------------------------------------------------------------------------------------------------------------------------------------------------------------------------------------------------------------------------------------------------------------------------------------------------------------------------------------------------------------------------------------------------------------------------------------------------------------------------------------------------------------------------------------------------------------------------------------------------------------------------------------------------------------------------------------------------------------------------------------------------------------|
| Journal:                      | <i>BMJ Open</i>                                                                                                                                                                                                                                                                                                                                                                                                                                                                                                                                                                                                                                                                                                                                                                                                                                                                                                                                                                                                                                                                                                                                                                                                                                                                                                                                                                                                                                                |
| Manuscript ID                 | bmjopen-2019-030960                                                                                                                                                                                                                                                                                                                                                                                                                                                                                                                                                                                                                                                                                                                                                                                                                                                                                                                                                                                                                                                                                                                                                                                                                                                                                                                                                                                                                                            |
| Article Type:                 | Protocol                                                                                                                                                                                                                                                                                                                                                                                                                                                                                                                                                                                                                                                                                                                                                                                                                                                                                                                                                                                                                                                                                                                                                                                                                                                                                                                                                                                                                                                       |
| Date Submitted by the Author: | 09-Apr-2019                                                                                                                                                                                                                                                                                                                                                                                                                                                                                                                                                                                                                                                                                                                                                                                                                                                                                                                                                                                                                                                                                                                                                                                                                                                                                                                                                                                                                                                    |
| Complete List of Authors:     | <p>Wang, Weidong; Shunde Hospital, Southern Medical University, Department of Hepatobiliary Surgery</p> <p>Shao, Ruoyang; Southern Medical University Nanfang Hospital, Department of Hepatology Unit and Infectious Diseases</p> <p>Zuo, Changzeng; Department of Hepatobiliary Surgery, Xingtai Institute of Cancer Control</p> <p>Li, Zhiwei; Department of Hepatobiliary Surgery, Xingtai Institute of Cancer Control</p> <p>Qi, Ruizhao; Department of General Surgery, The Fifth Medical Center of PLA General Hospital</p> <p>Liu, Qingbo; CHESS, Department of Hepatobiliary Surgery, Shunde Hospital, Southern Medical University</p> <p>Zhang, Weijie; CHESS, Department of Hepatobiliary Surgery, Shunde Hospital, Southern Medical University</p> <p>Mao, Xiaorong; CHESS Frontier Center Working Party, The First Hospital of Lanzhou University, Lanzhou University</p> <p>Song, Xiaojing; CHESS Frontier Center Working Party, The First Hospital of Lanzhou University, Lanzhou University</p> <p>Wang, Jitao; Xingtai People's Hospital, Xingtai, China, Department of Hepatobiliary Surgery</p> <p>Zhao, Xin; Department of Hepatobiliary Surgery, The Third People's Hospital of Shenzhen</p> <p>Liu, Chuan; Nanfang Hospital, Southern Medical University, Department of General Surgery</p> <p>Li, Xun; The First Hospital of Lanzhou University</p> <p>Qi, Xiaolong; The First Hospital of Lanzhou University, CHESS Frontier Center</p> |
| Keywords:                     | Hepatology < INTERNAL MEDICINE, Hepatobiliary surgery < SURGERY, Endoscopy < GASTROENTEROLOGY, Hepatobiliary disease < GASTROENTEROLOGY                                                                                                                                                                                                                                                                                                                                                                                                                                                                                                                                                                                                                                                                                                                                                                                                                                                                                                                                                                                                                                                                                                                                                                                                                                                                                                                        |
|                               |                                                                                                                                                                                                                                                                                                                                                                                                                                                                                                                                                                                                                                                                                                                                                                                                                                                                                                                                                                                                                                                                                                                                                                                                                                                                                                                                                                                                                                                                |

1  
2  
3  
4  
5  
6  
7  
8  
9  
10  
11  
12  
13  
14  
15  
16  
17  
18  
19  
20  
21  
22  
23  
24  
25  
26  
27  
28  
29  
30  
31  
32  
33  
34  
35  
36  
37  
38  
39  
40  
41  
42  
43  
44  
45  
46  
47  
48  
49  
50  
51  
52  
53  
54  
55  
56  
57  
58  
59  
60

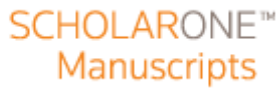

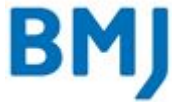

I, the Submitting Author has the right to grant and does grant on behalf of all authors of the Work (as defined in the below author licence), an exclusive licence and/or a non-exclusive licence for contributions from authors who are: i) UK Crown employees; ii) where BMJ has agreed a CC-BY licence shall apply, and/or iii) in accordance with the terms applicable for US Federal Government officers or employees acting as part of their official duties; on a worldwide, perpetual, irrevocable, royalty-free basis to BMJ Publishing Group Ltd ("BMJ") its licensees and where the relevant Journal is co-owned by BMJ to the co-owners of the Journal, to publish the Work in this journal and any other BMJ products and to exploit all rights, as set out in our [licence](#).

The Submitting Author accepts and understands that any supply made under these terms is made by BMJ to the Submitting Author unless you are acting as an employee on behalf of your employer or a postgraduate student of an affiliated institution which is paying any applicable article publishing charge ("APC") for Open Access articles. Where the Submitting Author wishes to make the Work available on an Open Access basis (and intends to pay the relevant APC), the terms of reuse of such Open Access shall be governed by a Creative Commons licence – details of these licences and which [Creative Commons](#) licence will apply to this Work are set out in our licence referred to above.

Other than as permitted in any relevant BMJ Author's Self Archiving Policies, I confirm this Work has not been accepted for publication elsewhere, is not being considered for publication elsewhere and does not duplicate material already published. I confirm all authors consent to publication of this Work and authorise the granting of this licence.

**TITLE PAGE****Title:**

Hepatic venous pressure gradient guided laparoscopic versus endoscopic therapy for variceal rebleeding in portal hypertension (CHESS1803): Study protocol of a multicenter randomized controlled trial

**Authors and Affiliations:**

Weidong Wang<sup>1†</sup>, Ruoyang Shao<sup>2†</sup>, Changzeng Zuo<sup>3†</sup>, Zhiwei Li<sup>4</sup>, Ruizhao Qi<sup>5</sup>, Qingbo Liu<sup>1</sup>, Weijie Zhang<sup>1</sup>, Xiaorong Mao<sup>6</sup>, Xiaojing Song<sup>6</sup>, Jitao Wang<sup>3</sup>, Xin Zhao<sup>4</sup>, Chuan Liu<sup>2</sup>, Xun Li<sup>6</sup>, Xiaolong Qi<sup>6</sup>

1. CHESS, Department of Hepatobiliary Surgery, Shunde Hospital, Southern Medical University, Foshan, China
2. CHESS, Department of Hepatology Unit and Infectious Diseases, Nanfang Hospital, Southern Medical University, Guangzhou, China
3. Department of Hepatobiliary Surgery, Xingtai Institute of Cancer Control, Xingtai, China
4. Department of Hepatobiliary Surgery, The Third People's Hospital of Shenzhen, Shenzhen, China
5. Department of General Surgery, The Fifth Medical Center of PLA General Hospital, Beijing, China
6. CHESS Frontier Center, The First Hospital of Lanzhou University, Lanzhou, China

† These authors contributed equally to this work.

**Corresponding to:**

Xiaolong Qi, MD

Chairman, CHESS (Chinese Portal Hypertension Diagnosis and Monitoring Study Group)

Director, CHESS Frontier Center, The First Hospital of Lanzhou University, Lanzhou, China

E-mail: qixiaolong@vip.163.com

**Keywords:**

1  
2  
3  
4 31 Hepatic venous pressure gradient, variceal rebleeding, randomized controlled trial

5  
6 32

7 33 **Word count:**

8  
9 34 2935 words  
10  
11  
12  
13  
14  
15  
16  
17  
18  
19  
20  
21  
22  
23  
24  
25  
26  
27  
28  
29  
30  
31  
32  
33  
34  
35  
36  
37  
38  
39  
40  
41  
42  
43  
44  
45  
46  
47  
48  
49  
50  
51  
52  
53  
54  
55  
56  
57  
58  
59  
60

For peer review only

## 35 **ABSTRACT**

### 36 **Introduction**

37 Gastroesophageal variceal bleeding is one of the most common and severe complications  
38 with high mortality in cirrhotic patients who developed portal hypertension. Hepatic venous  
39 pressure gradient (HVPG) is a globally recommended golden standard for portal pressure  
40 assessment and an HVPG  $\geq 16$ mmHg indicates a higher risk of death and rebleeding. This  
41 study aims to compare the effectiveness and safety of laparoscopic therapy plus propranolol  
42 and endoscopic therapy plus propranolol for variceal rebleeding in cirrhotic patients with  
43 HVPG between 16 and 20 mmHg.

### 45 **Methods and analysis**

46 This is a multicenter, randomized, controlled, clinical trial. Participants will be 1:1 assigned  
47 randomly into either laparoscopic or endoscopic groups. 40 participants whose transjugular  
48 HVPG lies between 16 and 20 mmHg with a history of gastroesophageal variceal bleeding  
49 will be recruited from three sites in China. Participants will receive either endoscopic therapy  
50 plus propranolol or laparoscopic therapy plus propranolol. The primary outcome measure will  
51 be occurrence of gastroesophageal variceal rebleeding. Secondary outcome measures will  
52 include: overall survival, occurrence of hepatocellular carcinoma, occurrence of venous  
53 thrombosis, quality of life and tolerability of treatment. Outcome measures will be evaluated  
54 at baseline, 12 weeks, 24 weeks, 36 weeks, 48 weeks and 60 weeks. Multivariate COX  
55 regression model will be introduced for analyses of occurrence data and Kaplan-Meier  
56 analysis with Log-rank Test for inter-group comparison. Student's t test, Wilcoxon rank sum  
57 test, chi-squared test or Fisher's exact test will be applied for analyses of other outcomes.

### 59 **Ethics and dissemination**

60 Ethical approval was obtained from all three participating sites. Primary and secondary  
61 outcome data will be submitted for publication in peer-reviewed journals and widely  
62 disseminated.

### 64 **Trial registration number**

1  
2  
3  
4 65 NCT03783065; Pre-results.  
5  
6 66

7  
8 67 **Trial status**

9 68 Recruitment for this study started on December 2018 while the first participant was  
10  
11 69 randomized on January 2019. Recruitment is estimated to stop on October 2019.  
12  
13 70

14  
15 71 **Strengths and limitations of this study**

- 16  
17 72 ■ This study is the first trial that concentrates on the best management on prevention of  
18  
19 73 rebleeding for cirrhotic patients with HVPG between 16 and 20 mmHg.  
20  
21 74 ■ This trial is the first one to compare the effectiveness of laparoscopic therapy plus  
22  
23 75 propranolol to endoscopic therapy plus propranolol recommended by international  
24  
25 76 guidelines.  
26  
27 77 ■ The surgical procedure involved in this study employs minimally invasive laparoscopy  
28  
29 78 instead of conventional operation, minimizing trauma and complications.  
30  
31 79 ■ Limitations of this trial include the lack of accessible data for sample size estimation,  
32  
33 80 potential influence in applicability in other countries due to etiological differences and  
34  
35 81 the relatively short follow-up period.  
36  
37 82

38  
39 83 **INTRODUCTION**

40 84 Cirrhosis is the result of multiple liver diseases and is accounted as a dynamic process.<sup>1</sup>  
41  
42 85 Portal hypertension is a vital event in the natural progression of cirrhosis that is responsible  
43  
44 86 for decompensating events like gastroesophageal variceal bleeding, ascites and hepatic  
45  
46 87 encephalopathy. Gastroesophageal varices could be seen in about 50% of cirrhotic patients  
47  
48 88 and those who developed variceal bleeding face a mortality of 5-20%.<sup>2,3</sup> Thus, the  
49  
50 89 stratification and applicable secondary prevention for patients with high risk is of great  
51  
52 90 clinical significance.  
53  
54 91 Hepatic venous pressure gradient (HVPG) is the difference between the wedged hepatic  
55  
56 92 venous pressure and free hepatic venous pressure.<sup>4</sup> Eliminating the influence of abdominal  
57  
58 93 pressure, HVPG is currently the most widely accepted reflection of portal pressure, and has  
59  
60 94 been demonstrated to have good performances in risk stratification<sup>3,5</sup> and predicting the



1  
2  
3  
4 95 response to treatments.<sup>6 7</sup> An HVPG over 12 mmHg suggests the occurrence of  
5  
6 96 gastroesophageal variceal bleeding.<sup>8</sup> Patients with HVPG over 16mmHg face higher risk of  
7  
8 97 death<sup>8-11</sup> and rebleeding,<sup>6</sup> while an HVPG over 20 mmHg predicts failure to control  
9  
10 98 bleeding, early rebleeding, and death due to acute variceal hemorrhage.<sup>12 13</sup> Currently,  
11  
12 99 international guidelines recommend endoscopic therapy combined with non-selective  
13  
14 100 beta-blockers to be the first-line therapy of secondary prevention for cirrhotic patients with  
15  
16 101 gastroesophageal variceal bleeding.<sup>3 5</sup> Nevertheless, patients with high HVPG still suffer  
17  
18 102 from risk of treatment failure. Recent years, early TIPS is recommended as a better choice for  
19  
20 103 patients with HVPG  $\geq 20$  mmHg,<sup>14 15</sup> while there still lack a strong evidence to determine the  
21  
22 104 best method for patients with HVPG between 16 and 20 mmHg.

23 105 Splenectomy and pericardial devascularisation, first performed by Hassab,<sup>16 17</sup> is a promising  
24  
25 106 surgical procedure for cirrhotic patients with gastroesophageal variceal bleeding, especially  
26  
27 107 for those with hypersplenism. With the rapid advance of laparoscopic techniques, since the  
28  
29 108 first laparoscopic splenectomy was reported in 1991,<sup>18</sup> post-operational complications which  
30  
31 109 used to be a major concern of Hassab's operation have been cut down to a great extent due to  
32  
33 110 less invasive procedures.<sup>19</sup> Laparoscopic therapy has been widely accepted for variceal  
34  
35 111 bleeding in Asia-pacific countries, where the predominant etiology of cirrhosis is hepatitis B  
36  
37 112 virus infection<sup>20</sup> combined with very high occurrence of hypersplenism.<sup>21</sup> However, there  
38  
39 113 haven't been any prospective trials comparing the effectiveness of laparoscopic therapy plus  
40  
41 114 propranolol to the internationally recommended first-line therapy. Also, the precise indication  
42  
43 115 to perform laparoscopic therapy is still unclear.

44 116 In this study, the outcomes of recruited patients whose HVPG lies within 16 and 20 mmHg  
45  
46 117 will be compared to explore the optimized management. Taking into consideration the  
47  
48 118 preferred performance of HVPG in risk stratification and the lack of prospective study in  
49  
50 119 long-term performance of laparoscopic therapy, this trial will be meaningful for both the  
51  
52 120 extension of HVPG risk stratification and the clarification of laparoscopic therapy indication.

53  
54 121

## 55 122 **Objectives**

56 123 The aim of this trial is to assess the effectiveness and safety of laparoscopic therapy plus  
57  
58 124 propranolol as first-line therapy of variceal rebleeding prevention for cirrhotic patients whose

1  
2  
3  
4 125 transjugular HVPG lies between 16 and 20 mmHg with gastroesophageal variceal bleeding  
5  
6 126 compared with endoscopic therapy plus propranolol. The primary outcome will be variceal  
7  
8 127 rebleeding. Secondary outcomes include: death, hepatocellular carcinoma, venous  
9  
10 128 thrombosis, quality of life and tolerability of treatment. We hypothesise that:  
11  
12 129 1. Compared to endoscopic therapy plus propranolol, laparoscopic therapy plus propranolol is  
13  
14 130 more effective in reducing variceal rebleeding.  
15  
16 131 2. Participants receiving laparoscopic splenectomy and pericardial devascularisation plus  
17  
18 132 propranolol show non-inferior overall survival and lower occurrence of hepatocellular  
19  
20 133 carcinoma over those who receiving endoscopic therapy plus propranolol.  
21  
22 134 3. The occurrence of venous thrombosis, QOL and KPS scores are without significant  
23  
24 135 difference between two groups.  
25  
26 136

## 137 **METHODS AND ANALYSIS**

### 138 **Study design**

139 This study is a multicenter, prospective, randomized controlled clinical trial. The overview of  
140 the study process is illustrated in Figure 1. After screened for eligibility, the participants will  
141 be randomly allocated to laparoscopic group or endoscopic group. After the operative  
142 intervention, there will be a 60-week follow-up period. All tests and interventions will be  
143 performed at three involved centers in China: (1) Shunde Hospital, Southern Medical  
144 University, (2) Xingtai People's Hospital and (3) The First Hospital of Lanzhou University.  
145

### 146 **Eligibility criteria**

#### 147 **Inclusion criteria**

148 Eligible participants should be (a) aged between 18 to 75 years, (b) clinically and/or  
149 pathologically diagnosed cirrhosis with portal hypertension, (c) with a history of  
150 gastroesophageal variceal bleeding (melena, hematemesis etc.), without receiving endoscopic  
151 treatment, (d) screened with transjugular HVPG between 16 and 20 mmHg after  
152 hospitalization, (e) with ECOG score  $\leq 2$  and KPS score  $\geq 60$  during screening, (f) assessed  
153 to be Child-Pugh class A or B and (g) voluntarily participate in the study and able to provide  
154 written informed consent and able to understand and willing to comply with the requirements

1  
2  
3  
4 155 of the study.

5  
6 156

7  
8 157 Exclusion criteria

9  
10 158 Those who conforms to any of the following would be excluded: (a) pregnant or  
11  
12 159 breastfeeding women, (b) with prior known or suspected malignancy (hepatocellular  
13  
14 160 carcinoma, cholangiocarcinoma etc.), (c) with limited coagulation situation (Quick < 50%,  
15  
16 161 PTT > 50 sec, thrombocyte count < 50000 /  $\mu$ l or disturbed thrombocyte function), (d) with  
17  
18 162 massive ascites, (e) assessed to be Child-Pugh class C, (f) refusing or inadequate for  
19  
20 163 transjugular HVPG measurement and (g) with other situations whose existence judged  
21  
22 164 inadequate for participation by the investigators.

23  
24 165

### 25 166 **Recruitment**

26  
27 167 Recruitment has started in December 2018 and will continue until the intent sample size has  
28  
29 168 been reached. Participants (n = 40) from China are recruited in three sites through (1) posters,  
30  
31 169 which show the condition of the trial, (2) social media (ie, websites, WeChat) and (3) the  
32  
33 170 advice of the doctors.

34  
35 171

### 36 172 **Patient and public involvement**

37  
38 173 Patients and public were not involved in the design and development of the study.

39  
40  
41 174

### 42 175 **Randomisation**

43  
44 176 Eligible patients will be randomly allocated (1:1) to either the laparoscopic group or the  
45  
46 177 endoscopic group after signing on an informed consent, before which the patients will be  
47  
48 178 informed about the trial in detail. The groups will be stratified by Child-Pugh class, age ( $\leq$  60  
49  
50 179 years or  $>$  60 years) and gender. For the randomization, the randPack package of R  
51  
52 180 software (R Project for Statistical Computing, Vienna, Austria) will be introduced. The  
53  
54 181 randomisation will be generated by a statistician independent of the study.

55  
56 182

### 57 183 **Operative interventions**

58  
59 184 All operative interventions will be performed by trained and experienced specialists affiliated  
60

1  
2  
3  
4 185 to the university centers. Doppler ultrasonography, CT, electrocardiogram and  
5 186 esophagogastroduodenoscopy will be performed routinely pre-operation.  
6  
7  
8 187

9 188 Participants assigned to the laparoscopic group will undergo laparoscopic therapy within 48h  
10  
11 189 after randomisation. Laparoscopic therapy will be performed as previously described.<sup>20</sup>  
12

13 190 General anesthesia will be applied for all participants. Major procedures of the operation  
14  
15 191 include splenectomy and the dissection and ligation of short gastric vessels, posterior gastric  
16  
17 192 vessels and all branches of proximal lesser curvature, cardia and lower 6 to 8 cm part of  
18  
19 193 abdominal esophagus from the stomach coronary vein. During the process of  
20  
21 194 devascularisation, the high esophageal branches and heterotopic high esophageal branches  
22  
23 195 will be carefully screened.  
24

25 196  
26  
27 197 Participants assigned to the endoscopic group will undergo initial endoscopic therapy within  
28  
29 198 48h after randomisation. Candidate procedures for endoscopic therapy include endoscopic  
30  
31 199 variceal ligation (EVL), cyanoacrylate glue injection and sclerotherapy. Decision of which  
32  
33 200 procedure to adopt will be made by experienced specialist according to the condition of the  
34  
35 201 participant, while EVL will be considered the first option as recommended by guidelines.<sup>3 5</sup>  
36  
37 202 Treatments will be performed again every 1-2 week until completely eradication of varices.  
38  
39 203

#### 40 204 **Propranolol oral administration**

41  
42 205 Participants assigned to both groups will begin to receive propranolol after the randomisation.  
43  
44 206 Propranolol shall be administrated orally while keeping monitoring the heart rate and blood  
45  
46 207 pressure daily, starting from 20-40 mg b.i.d and adjusting every 2 or 3 days (maximum dose:  
47  
48 208 320 mg/d for participants without ascites, 160 mg/d for participants with ascites) to achieve a  
49  
50 209 resting heart rate of 55-60 beats/min while the systolic blood pressure maintain > 90 mmHg.<sup>5</sup>  
51  
52 210 The dose can always be adjusted according to the response on participants.  
53

54 211

#### 55 212 **Outcomes and assessments**

##### 56 213 **Primary outcome**

57  
58 214 In order to compare the effectiveness of laparoscopic group with endoscopic group, the  
59  
60

215 primary outcome of the study is set to be variceal rebleeding. Endpoints will be 1-year  
 216 rebleeding rate and rebleeding time.  
 217  
 218 Secondary outcomes  
 219 Secondary outcomes include: death, hepatocellular carcinoma, venous thrombosis, quality of  
 220 life and tolerability of treatment. Following endpoints will be applied, respectively: (1)  
 221 overall survival, (2) the occurrence of hepatocellular carcinoma, (3) the occurrence of venous  
 222 thrombosis, (4) quality of life (QOL) score and (5) Karnofsky (KPS) score. QOL score and  
 223 KPS score are treated as the reflection of safety and tolerability of treatment. The occurrence  
 224 and exact kind of adverse events will be recorded to this end and treated as an outcome  
 225 candidate. Also, serum markers will be introduced for monitor of change on liver functions  
 226 and compared between two groups.

Table 1 Assessments and time points

| Assessment                 | Time points   |                |     |     |     |     |     |
|----------------------------|---------------|----------------|-----|-----|-----|-----|-----|
|                            | Pre-operation | Post-operation | 12w | 24w | 36w | 48w | 60w |
| HVPG measurement           | x             |                |     |     |     |     |     |
| Laboratory tests           | x             |                | x   | x   | x   | x   | x   |
| Color Doppler ultrasound   | x             |                |     |     |     |     |     |
| Liver stiffness            | x             |                |     |     |     |     |     |
| CT                         | x             |                |     |     |     |     |     |
| Esophagogastroduodenoscopy | x             | x              |     |     |     |     |     |
| Electrocardiogram          | x             |                |     |     |     |     |     |
| Quality of life            |               |                | x   | x   | x   | x   | x   |
| Karnofsky                  |               |                | x   | x   | x   | x   | x   |

228  
 229 Assessments  
 230 Time points of involved assessments to be performed are outlined in Table 1. For participants  
 231 allocated to either the groups, the following assessments will be performed and  
 232 corresponding data will be collected:  
 233 1. Demographic characteristics including gender, height, weight, date of birth and ethnic.  
 234 2. Disease history with clear record about the number of occurrence of gastroesophageal  
 235 variceal bleeding and other complexes including ascites, spontaneous bacterial peritonitis,

- 1  
2  
3  
4 236 hepatic encephalopathy, electrolyte imbalance, portal venous thrombosis, hepatorenal  
5  
6 237 syndrome and hepatopulmonary syndrome, etc.  
7  
8 238 3. Clinical diagnosis and etiology for cirrhosis.  
9  
10 239 4. Laboratory test results including red blood cells, white blood cells, haemoglobin, blood  
11  
12 240 ammonia, platelet count, prothrombin time, activated partial thromboplastin time,  
13  
14 241 international normalized ratio, total bilirubin, direct and indirect bilirubin, glutamine  
15  
16 242 transferase, alanine aminotransferase, aspartate aminotransferase, albumin and serum  
17  
18 243 creatinine.  
19  
20 244 5. Color Doppler ultrasound results including general condition of spleen and liver, spleen  
21  
22 245 diameter, portal vein diameter, portal vein velocity, splenic vein velocity, splenic venous  
23  
24 246 reflux, cardiac output, left ventricular ejection fraction and heart output.  
25  
26 247 6. Liver stiffness and spleen stiffness assessed by FibroTouch or FibroScan.  
27  
28 248 7. Abdominal CT scans.  
29  
30 249 8. Esophagogastroduodenoscopy results including the location, classification, diameter of  
31  
32 250 varices and red signs.  
33  
34 251 9. Electrocardiogram results.  
35  
36 252 10. Child-Pugh score and classes.  
37  
38 253 11. QOL score.  
39  
40 254 12. KPS score.  
41  
42 255 13. Adjustment records of dosage of propranolol.  
43  
44 256 14. Adverse events and severe adverse events of any cause.  
45  
46 257 Upon occurrence of the first variceal rebleeding after the operative intervention, the  
47  
48 258 following data will be additionally collected:  
49  
50 259 1. Cause of rebleeding.  
51  
52 260 2. Time of rebleeding since enrollment.  
53  
54 261 3. Treatment and outcome of the rebleeding.  
55  
56 262 Upon death of a participant, the following data will be additionally collected:  
57  
58 263 1. Time of death since enrollment.  
59  
60 264 2. Cause of death.  
265

## 266 **Sample size estimation**

267 No study has yet compared the outcome between cirrhotic patients with gastroesophageal  
 268 variceal bleeding receiving either laparoscopic therapy or endoscopic therapy. Also, because  
 269 of the lack of study restricting HVPG baseline level and studies about laparoscopic therapy  
 270 plus propranolol oral administration, the sample size is determined based on pooled data of  
 271 variceal rebleeding rate of several studies including endoscopic therapy plus propranolol oral  
 272 administration or laparoscopic therapy. The variceal rebleeding rate of endoscopic therapy  
 273 plus propranolol oral administration is estimated by 6 RCTs (Table 2).<sup>22-27</sup> The variceal  
 274 rebleeding rate of laparoscopic therapy is estimated by 6 retrospective studies (Table 2).<sup>20</sup>  
 275 <sup>28-32</sup> Pooled rates of variceal rebleeding for endoscopic group and laparoscopic group are 44%  
 276 and 6%, respectively. Considering a type I error rate ( $\alpha$ ) of 5% and a type II error rate ( $1-\beta$ ) of  
 277 20% and a dropout rate of 10%, the calculated sample size for this trial is 40.

Table 2 Variceal rebleeding rates in cirrhotic patients with portal hypertension bleeding treated by endoscopic therapy plus propranolol or laparoscopic therapy: a review of 12 studies.

| Laparoscopic therapy |                    |                          | Endoscopic therapy plus propranolol |                    |                          |
|----------------------|--------------------|--------------------------|-------------------------------------|--------------------|--------------------------|
| First author, year   | Number of patients | Number of rebleeding (%) | First author, year                  | Number of patients | Number of rebleeding (%) |
| Zheng, 2018          | 250                | 9 (3.6%)                 | Lv, 2018                            | 25                 | 13 (52%)                 |
| Bai, 2017            | 40                 | 2 (5%)                   | Holster, 2016                       | 35                 | 10 (28.6%)               |
| Bao, 2017            | 76                 | 19 (25%)                 | Luo, 2015                           | 36                 | 21 (58.3%)               |
| Cheng, 2014          | 204                | 7 (3.4%)                 | Hung, 2012                          | 47                 | 22 (46.8%)               |
| Jiang, 2009          | 26                 | 0 (0%)                   | Sauer, 2002                         | 40                 | 12 (30%)                 |
| Wang, 2008           | 22                 | 0 (0%)                   | Rössle, 1997                        | 62                 | 29 (46.8%)               |

## 280 **Ethics and dissemination**

281 Ethical approval was obtained from all three participating centers. Any modifications in  
 282 protocol will be done under the premise of adequate communication and approval. All  
 283 interventions and assessments included in this trial will be in full compliance with Good  
 284 Clinical Practice (GCP).

285 Before the allocation, all participant candidates will be fully informed about the purpose,  
 286 process and possible consequences of the trial. Before any treatment, the participants will be

1  
2  
3  
4 287 informed about the interventions they will undergo and the interventions will not be applied  
5 288 before a written informed consent signed by the participants themselves is provided.

6  
7 289 The result of this trial (CHESS1803) will be presented at national and international  
8  
9 290 conferences and published in peer-reviewed journals.

10  
11 291

### 12 13 292 **Safety**

14  
15 293 Laparoscopic therapy is accepted and performed in Asia-pacific countries, while endoscopic  
16  
17 294 therapy is generally implemented worldwide. Both surgical interventions showed low risks of  
18  
19 295 severe adverse events. Nevertheless, the participants and whose relatives will be able to  
20  
21 296 contact the study team when any severe adverse event or disease complication occurs. The  
22  
23 297 participants will receive proper treatments as soon as feasible.

24  
25 298 The following data will be recorded when an adverse event occurs:

- 26  
27 299 1. The exact kind of adverse event.  
28  
29 300 2. The starting, ending and reporting time of the adverse event.  
30  
31 301 3. Severity of the adverse event.  
32  
33 302 4. Treatment and outcome of the adverse event.

34  
35 303 Adverse events will be documented and reported to the investigators and ethics board of the  
36  
37 304 involved center in 48h. Severe adverse events will be documented and reported to the  
38  
39 305 investigators and ethics board of the involved center, principle investigator and supervision  
40  
41 306 departments required by GCP immediately.

42  
43 307

### 44 45 308 **Data management**

46  
47 309 For imaging data, the electronic form images will be collected. Other raw data will be  
48  
49 310 recorded in the written form case report form first and saved electronically afterwards. All  
50  
51 311 electronic data will be kept by a member of the study team without direct clinical contact  
52  
53 312 with any of the centers. All written form data will be stored in cabinets with lock permitting  
54  
55 313 access for only investigators. All data will be kept for 25 years after publication and  
56  
57 314 destroyed after then.

58  
59 315

### 60 316 **Statistical analyses**



1  
2  
3  
4 317 Statistical analyses will be performed in intention-to-treat cases. No interim analyses will be  
5  
6 318 conducted on the primary outcome. Multivariate COX regression model will be introduced  
7  
8 319 for analyses of variceal rebleeding and survival, while applying Kaplan-Meier analysis with  
9  
10 320 Log-rank test for inter-group comparison. Occurrence data including variceal rebleeding,  
11  
12 321 overall survival, hepatocellular carcinoma and portal venous thrombosis will be compared  
13  
14 322 using the chi square test. For data with repeated measurements including QOL score, KPS  
15  
16 323 score and laboratory tests results, repeated measures ANOVA will be applied. The  
17  
18 324 occurrence and severity of all adverse events will be collected and compared with descriptive  
19  
20 325 analyses and Wilcoxon rank sum test. Student's t test or Wilcoxon rank sum test (for  
21  
22 326 continuous data) and chi square test or Fisher's exact test (for discrete variable) will be  
23  
24 327 applied for analyses of other unmentioned outcomes. All results will be presented with 95%  
25  
26 328 CIs.

## 329 330 **DISCUSSION**

331 To the best of our knowledge, this study is the first to compare the effectiveness and safety of  
332  
333 laparoscopic therapy plus propranolol with endoscopic therapy plus propranolol, the first-line  
334  
335 therapy recommended by international guidelines,<sup>3 5</sup> under an HVPG-guided manner. The  
336  
337 risk stratification performance of HVPG has been receiving more concentration and several  
338  
339 attempts have been made on HVPG-guided therapy.<sup>33 34</sup> By introducing HVPG restriction as  
340  
341 an eligibility criterion, this study targets the population that faces high risk of variceal  
342  
343 rebleeding and death<sup>6 8-11</sup> better, enabling exploration of better management for these patients  
344  
345 as well as extension of clinical performance of HVPG.

346  
347 The first splenectomy and pericardial devascularisation was performed by Hassab in 1964<sup>35</sup>  
348  
349 and modified by Qiu Fazu in 1981.<sup>36</sup> Benefitted from the rapid development of laparoscopic  
350  
351 equipment and techniques, surgical procedures for variceal bleeding are becoming  
352  
353 decreasingly invasive and also with much lower occurrence of adverse events.<sup>20 29 37-39</sup> Such  
354  
355 laparoscopic therapy has been accepted as one of the most common used methods for variceal  
356  
357 bleeding in Asia-pacific countries. Pericardial devascularisation and splenectomy increase the  
358  
359 blood flow of portal vein and ameliorate leukopenia and thrombocytopenia. Thus,  
360  
361 laparoscopic therapy is considered an effective method for variceal bleeding while only

1  
2  
3  
4 347 minimally affect liver function with satisfying performance on long-term survival and general  
5  
6 348 condition of patients. However, it is also reported to be correlated with high occurrence of  
7  
8 349 portal venous thrombosis<sup>40</sup> and exacerbation of portal hypertensive gastropathy.<sup>41</sup> Therefore,  
9  
10 350 a multicenter prospective study about laparoscopic therapy will provide valuable information  
11  
12 351 for the clarification of its influence to the overall outcome.

13  
14 352 Endoscopic therapy plus non-selective beta blockers is recommended as the first-line therapy  
15  
16 353 and widely served as control groups in many studies.<sup>22-27 42</sup> On the contrary, studies about  
17  
18 354 laparoscopic therapy are mainly single-arm<sup>20 32 43</sup> or compared with variants and other  
19  
20 355 surgeries.<sup>28-31 40 44 45</sup> To the best of our knowledge, there haven't been any trials about  
21  
22 356 laparoscopic therapy using endoscopic therapy plus non-selective beta blockers as controls.  
23  
24 357 Thus, this study will also provide data with better comparability to other commonly used  
25  
26 358 therapies.

27  
28 359 Still, this study has several limitations. First, this is the first prospective study investigating  
29  
30 360 the HVPg-guided therapeutic effect of laparoscopic therapy plus propranolol and endoscopic  
31  
32 361 therapy plus propranolol. The lack of enough previous studies may lead to deviations in  
33  
34 362 sample size estimation. Second, the major cause of cirrhosis of the target population of this  
35  
36 363 study is hepatitis B virus infection while it is more complex in American and European  
37  
38 364 countries. Differences in etiology may bring problems in applicability. Third, the period of  
39  
40 365 follow-up in this study is set to be about one year, which may not be enough to thoroughly  
41  
42 366 unfold the long-term effect of laparoscopic therapy.

43 367

#### 45 368 **Author affiliations**

- 46  
47 369 1. CHESS, Department of Hepatobiliary Surgery, Shunde Hospital, Southern Medical University,  
48  
49 370 Foshan, China  
50  
51 371 2. CHESS, Department of Hepatology Unit and Infectious Diseases, Nanfang Hospital, Southern  
52  
53 372 Medical University, Guangzhou, China  
54  
55 373 3. Department of Hepatobiliary Surgery, Xingtai Institute of Cancer Control, Xingtai, China  
56  
57 374 4. Department of Hepatobiliary Surgery, The Third People's Hospital of Shenzhen, Shenzhen, China  
58  
59 375 5. Department of General Surgery, The Fifth Medical Center of PLA General Hospital, Beijing, China  
60

1  
2  
3  
4 376 6. CHESS Frontier Center, The First Hospital of Lanzhou University, Lanzhou, China

5  
6 377

7 378 **Contributors** Xiaolong Qi, Weidong Wang, Changzeng Zuo, Zhiwei Li and Xun Li conceived and

8  
9 379 designed the study. Qingbo Liu, Weijie Zhang, Xiaorong Mao, Xiaojing Song, Jitao Wang and Chuan Liu

10  
11 380 are responsible of the data collecting and management. Ruoyang Shao drafted this manuscript. Ruizhao Qi,

12  
13 381 Xin Zhao and Xiaolong Qi critically revised the manuscript. The final version of the manuscript was

14  
15 382 reviewed and approved by all authors.

16  
17 383

18  
19 384 **Funding** This work is funded by the grants from National Natural Science Foundation of China

20  
21 385 (81600510); Guangdong Science Fund for Distinguished Young Scholars (2018B030306019); Guangzhou

22  
23 386 Industry-Academia-Research Collaborative Innovation Major Project (201704020015).

24  
25 387

26  
27 388 **Disclaimer** The funders do not participate in the design, recruitment, intervention, data collection, data

28  
29 389 management and analysis of the study and the preparation and revision of this protocol.

30  
31 390

32  
33 391 **Competing interests** None declared.

34  
35 392

36  
37 393 **Patient consent for publication** Obtained.

38  
39 394

40  
41 395 **Ethics approval** This study has been approved by the ethics committee of Shunde Hospital, Southern

42  
43 396 Medical University (20190104); Xingtai People's Hospital ([2019]001); The First Hospital of Lanzhou

44  
45 397 University (LDYYLL2019-179).

46  
47 398

48  
49 399 **Provenance and peer review** Not commissioned; internally peer reviewed.

50  
51 400

52  
53 401 **Data availability statement** All data from this study will be made available upon reasonable request. To

54  
55 402 request for data, please contact the corresponding author.

56  
57 403

58  
59 404 **Open access** This is an open access article distributed in accordance with the Creative Commons

60  
405 Attribution Non Commercial (CC BY-NC 4.0) license, which permits others to distribute, remix, adapt,

1  
2  
3  
4 406 build upon this work non-commercially, and license their derivative works on different terms, provided the  
5  
6 407 original work is properly cited, appropriate credit is given, any changes made indicated, and the use is  
7  
8 408 non-commercial. See: <http://creativecommons.org/licenses/by-nc/4.0/>.

9 409

## 11 410 **References**

- 13 411 1. Tsochatzis EA, Bosch J, Burroughs AK. Liver cirrhosis. *The Lancet* 2014;383:1749-61.
- 14 412 2. Garcia-Tsao G, Bosch J. Management of varices and variceal hemorrhage in cirrhosis. *The New England*  
15 413 *journal of medicine* 2010;362:823-32.
- 17 414 3. de Franchis R, Baveno VIF. Expanding consensus in portal hypertension: Report of the Baveno VI Consensus  
18 415 Workshop: Stratifying risk and individualizing care for portal hypertension. *Journal of hepatology*  
19 416 2015;63:743-52.
- 21 417 4. Bosch J, Abraldes JG, Berzigotti A, et al. The clinical use of HVPG measurements in chronic liver disease.  
22 418 *Nature reviews Gastroenterology & hepatology* 2009;6:573-82.
- 23 419 5. Garcia-Tsao G, Abraldes JG, Berzigotti A, et al. Portal hypertensive bleeding in cirrhosis: Risk stratification,  
24 420 diagnosis, and management: 2016 practice guidance by the American Association for the study of liver  
25 421 diseases. *Hepatology* 2017;65:310-35.
- 27 422 6. Li GQ, Yang B, Liu J, et al. Hepatic venous pressure gradient is a useful predictor in guiding treatment on  
28 423 prevention of variceal rebleeding in cirrhosis. *International journal of clinical and experimental medicine*  
29 424 2015;8:19709-16.
- 31 425 7. Qi XS, Fan DM. Hepatic venous pressure gradient measurement before TIPS for acute variceal bleeding.  
32 426 *World journal of gastroenterology* 2014;20:7523-4.
- 34 427 8. Garcia-Tsao G, Groszmann RJ, Fisher RL, et al. Portal pressure, presence of gastroesophageal varices and  
35 428 variceal bleeding. *Hepatology* 1985;5:419-24.
- 36 429 9. Berzigotti A, Rossi V, Tiani C, et al. Prognostic value of a single HVPG measurement and Doppler-ultrasound  
37 430 evaluation in patients with cirrhosis and portal hypertension. *Journal of gastroenterology* 2011;46:687-95.
- 39 431 10. Silva-Junior G, Baiges A, Turon F, et al. The prognostic value of hepatic venous pressure gradient in patients  
40 432 with cirrhosis is highly dependent on the accuracy of the technique. *Hepatology* 2015;62:1584-92.
- 41 433 11. Merkel C, Bolognesi M, Bellon S, et al. Prognostic usefulness of hepatic vein catheterization in patients with  
42 434 cirrhosis and esophageal varices. *Gastroenterology* 1992;102:973-9.
- 44 435 12. Moitinho E, Escorsell A, Bandi JC, et al. Prognostic value of early measurements of portal pressure in acute  
45 436 variceal bleeding. *Gastroenterology* 1999;117:626-31.
- 47 437 13. Monescillo A, Martinez-Lagares F, Ruiz-del-Arbol L, et al. Influence of portal hypertension and its early  
48 438 decompression by TIPS placement on the outcome of variceal bleeding. *Hepatology* 2004;40:793-801.
- 49 439 14. Garcia-Pagan JC, Caca K, Bureau C, et al. Early use of TIPS in patients with cirrhosis and variceal bleeding.  
50 440 *The New England journal of medicine* 2010;362:2370-9.
- 52 441 15. Zhang M, Wang G, Zhao L, et al. Second prophylaxis of variceal bleeding in cirrhotic patients with a high  
53 442 HVPG. *Scandinavian journal of gastroenterology* 2016;51:1502-06.
- 54 443 16. Hassab MA. Gastroesophageal decongestion and splenectomy in the treatment of esophageal varices in  
55 444 bilharzial cirrhosis: further studies with a report on 355 operations. *Surgery* 1967;61:169-76.
- 57 445 17. Hassab MA, Younis MT, el-Kilany MS. Gastroesophageal decongestion and splenectomy in the treatment of  
58 446 esophageal varices secondary to bilharzial cirrhosis: anatomical and experimental studies. *Surgery*  
59 447 1968;63:731-7.

- 1  
2  
3 448 18. Delaitre B, Maignien B. [Splenectomy by the laparoscopic approach. Report of a case]. *Presse medicale*
- 4 449 (*Paris, France : 1983*) 1991;20:2263.
- 5  
6 450 19. Wang Y, Zhan X, Zhu Y, et al. Laparoscopic splenectomy in portal hypertension: a single-surgeon 13-year
- 7 451 experience. *Surgical endoscopy* 2010;24:1164-9.
- 8  
9 452 20. Cheng Z, Li JW, Chen J, et al. Therapeutic effects of laparoscopic splenectomy and esophagogastric
- 10 453 devascularization on liver cirrhosis and portal hypertension in 204 cases. *Journal of laparoendoscopic &*
- 11 454 *advanced surgical techniques Part A* 2014;24:612-6.
- 12  
13 455 21. Sun Y, Lan X, Shao C, et al. Clinical features of idiopathic portal hypertension in China: A retrospective study
- 14 456 of 338 patients and literature review. *Journal of gastroenterology and hepatology* 2018.
- 15  
16 457 22. Lv Y, Qi X, He C, et al. Covered TIPS versus endoscopic band ligation plus propranolol for the prevention of
- 17 458 variceal rebleeding in cirrhotic patients with portal vein thrombosis: a randomized controlled trial. *Gut*
- 18 459 2018;67:2156-68.
- 19  
20 460 23. Holster IL, Tjwa ET, Moelker A, et al. Covered transjugular intrahepatic portosystemic shunt versus
- 21 461 endoscopic therapy + beta-blocker for prevention of variceal rebleeding. *Hepatology* 2016;63:581-9.
- 22  
23 462 24. Luo X, Wang Z, Tsauo J, et al. Advanced Cirrhosis Combined with Portal Vein Thrombosis: A Randomized
- 24 463 Trial of TIPS versus Endoscopic Band Ligation Plus Propranolol for the Prevention of Recurrent Esophageal
- 25 464 Variceal Bleeding. *Radiology* 2015;276:286-93.
- 26  
27 465 25. Hung HH, Chang CJ, Hou MC, et al. Efficacy of non-selective beta-blockers as adjunct to endoscopic
- 28 466 prophylactic treatment for gastric variceal bleeding: a randomized controlled trial. *Journal of hepatology*
- 29 467 2012;56:1025-32.
- 30  
31 468 26. Sauer P, Hansmann J, Richter GM, et al. Endoscopic variceal ligation plus propranolol vs. transjugular
- 32 469 intrahepatic portosystemic stent shunt: a long-term randomized trial. *Endoscopy* 2002;34:690-7.
- 33  
34 470 27. Rössle M, Deibert P, Haag K, et al. Randomized trial of transjugular-intrahepatic-portosystemic shunt
- 35 471 versus endoscopy plus propranolol for prevention of variceal rebleeding. *The Lancet* 1997;349:1043-49.
- 36  
37 472 28. Bai D-S, Chen P, Jin S-J, et al. Vagus nerve-preserving versus conventional laparoscopic splenectomy and
- 38 473 azygoportal disconnection. *Surgical endoscopy* 2017;32:2696-703.
- 39  
40 474 29. Zheng S, Sun P, Liu X, et al. Efficacy and safety of laparoscopic splenectomy and esophagogastric
- 41 475 devascularization for portal hypertension: A single-center experience. *Medicine* 2018;97:e13703.
- 42  
43 476 30. Bao H, He Q, Dai N, et al. Retrospective Study to Compare Selective Decongestive Devascularization and
- 44 477 Gastrosplenic Shunt versus Splenectomy with Pericardial Devascularization for the Treatment of Patients with
- 45 478 Esophagogastric Varices Due to Cirrhotic Portal Hypertension. *Medical Science Monitor* 2017;23:2788-95.
- 46  
47 479 31. Jiang X-Z, Zhao S-Y, Luo H, et al. Laparoscopic and open splenectomy and azygoportal disconnection for
- 48 480 portal hypertension. *World journal of gastroenterology* 2009;15:3421.
- 49  
50 481 32. Wang YD, Ye H, Ye ZY, et al. Laparoscopic Splenectomy and Azygoportal Disconnection for Bleeding Varices
- 51 482 with Hypersplenism. *Journal of Laparoendoscopic & Advanced Surgical Techniques* 2008;18:37-41.
- 52  
53 483 33. Villanueva C, Graupera I, Aracil C, et al. A randomized trial to assess whether portal pressure guided
- 54 484 therapy to prevent variceal rebleeding improves survival in cirrhosis. *Hepatology* 2017;65:1693-707.
- 55  
56 485 34. Villanueva C, Aracil C, Colomo A, et al. Clinical trial: a randomized controlled study on prevention of
- 57 486 variceal rebleeding comparing nadolol + ligation vs. hepatic venous pressure gradient-guided pharmacological
- 58 487 therapy. *Alimentary pharmacology & therapeutics* 2009;29:397-408.
- 59  
60 488 35. Hassab MA. GASTROESOPHAGEAL DECONGESTION AND SPLENECTOMY. A METHOD OF PREVENTION AND
- 489 TREATMENT OF BLEEDING FROM ESOPHAGEAL VARICES ASSOCIATED WITH BILHARZIAL HEPATIC FIBROSIS:
- 490 PRELIMINARY REPORT. *The Journal of the International College of Surgeons* 1964;41:232-48.
- 491  
492 36. Qiu FZ. Evaluation of the pericardial devascularization in portal hypertension. *Zhonghua wai ke za zhi*

- 1  
2  
3 492 [Chinese journal of surgery] 1983;21:275-7.  
4 493 37. Zhan XL, Ji Y, Wang YD. Laparoscopic splenectomy for hypersplenism secondary to liver cirrhosis and portal  
5 494 hypertension. *World journal of gastroenterology* 2014;20:5794-800.  
6 495 38. Yu H, Guo S, Wang L, et al. Laparoscopic Splenectomy and Esophagogastric Devascularization for Liver  
7 496 Cirrhosis and Portal Hypertension Is a Safe, Effective, and Minimally Invasive Operation. *Journal of*  
8 497 *laparoendoscopic & advanced surgical techniques Part A* 2016;26:524-30.  
9 498 39. Liu Y, Li Y, Ma J, et al. A modified Hassab's operation for portal hypertension: experience with 562 cases.  
10 499 *The Journal of surgical research* 2013;185:463-8.  
11 500 40. Sun L, Zhou H, Gu L, et al. Effects of surgical procedures on the occurrence and development of  
12 501 postoperative portal vein thrombosis in patients with cirrhosis complicated by portal hypertension.  
13 502 *International journal of surgery* 2015;16:31-35.  
14 503 41. Huang Y, Wang W, Wang J, et al. Surgical treatment of portal hypertension: 45 year experience. *Zhonghua*  
15 504 *wai ke za zhi [Chinese journal of surgery]* 2000;38:85-8.  
16 505 42. Sarin SK, Wadhawan M, Agarwal SR, et al. Endoscopic variceal ligation plus propranolol versus endoscopic  
17 506 variceal ligation alone in primary prophylaxis of variceal bleeding. *The American journal of gastroenterology*  
18 507 2005;100:797-804.  
19 508 43. Wu SD, Fan Y, Kong J, et al. Transumbilical single-incision laparoscopic splenectomy plus pericardial  
20 509 devascularization using conventional instruments: initial experience of 5 cases. *Journal of laparoendoscopic &*  
21 510 *advanced surgical techniques Part A* 2013;23:150-3.  
22 511 44. Ando K, Kurokawa T, Nagata H, et al. Laparoscopic surgery in the management of hypersplenism and  
23 512 esophagogastric varices: our initial experiences. *Surgical innovation* 2012;19:421-7.  
24 513 45. Chen H, Yang F, Li TT, et al. Comparison of Efficacy of Laparoscopic and Open Splenectomy Combined With  
25 514 Selective and Nonselective Pericardial Devascularization in Portal Hypertension Patients. *Surgical laparoscopy,*  
26 515 *endoscopy & percutaneous techniques* 2018;28:401-03.  
27  
28  
29  
30  
31  
32  
33  
34  
35  
36  
37  
38  
39  
40  
41  
42  
43  
44  
45  
46  
47  
48  
49  
50  
51  
52  
53  
54  
55  
56  
57  
58  
59  
60

1  
2  
3  
4  
5  
6  
7  
8  
9  
10  
11  
12  
13  
14  
15  
16  
17  
18  
19  
20  
21  
22  
23  
24  
25  
26  
27  
28  
29  
30  
31  
32  
33  
34  
35  
36  
37  
38  
39  
40  
41  
42  
43  
44  
45  
46  
47  
48  
49  
50  
51  
52  
53  
54  
55  
56  
57  
58  
59  
60

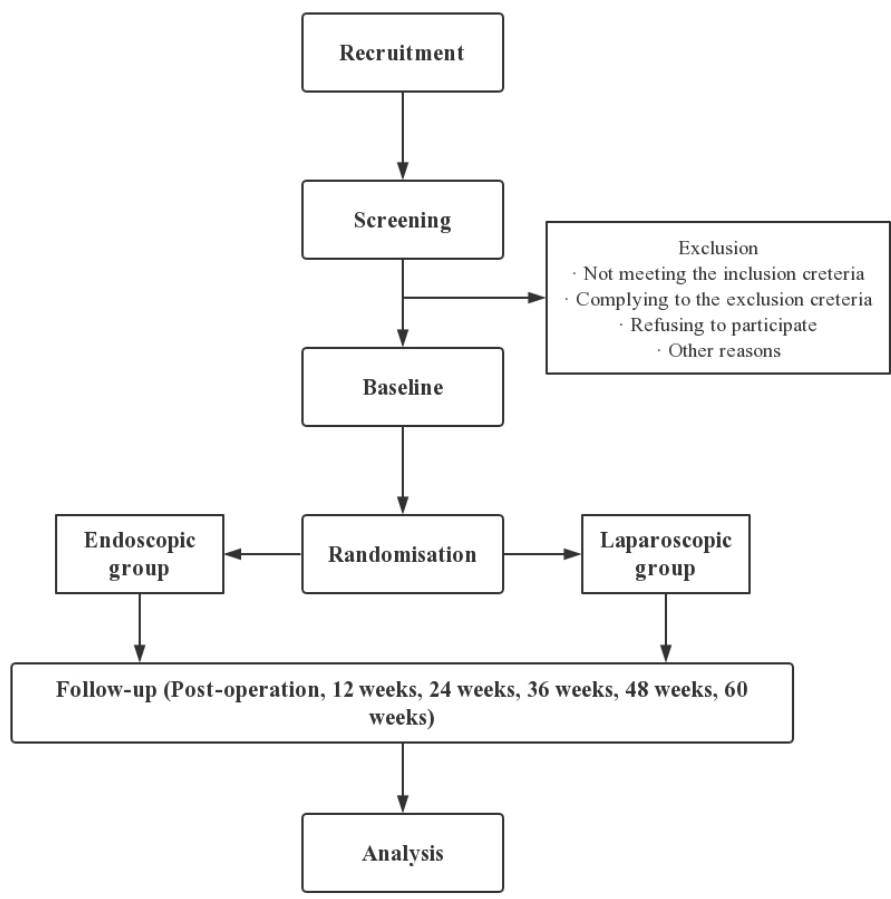

Flow chart for study design.

## Informed Consent Form

Dear madam/sir,

You are invited to participate in a multicenter randomized controlled trial assessing the effectiveness and safety of laparoscopic therapy plus propranolol as first-line therapy of secondary prevention for cirrhotic patients with gastroesophageal varices. The following items contain important information including the background, aim, method, possible merits and risks for participants about this trial. We would like to request you to read them carefully before you make your decision for they may assist you to decide whether to participate in this trial or not. If you have any questions, please contact the investigator in charge for this trial directly to ensure your fully understanding. Your participation is of completely voluntary. Please sign in the statements section of this form if you agree to participate.

### **Aim of study**

Laparoscopic therapy is one of the most commonly used interventions for gastroesophageal variceal bleeding. Current experience in clinical practice has proved it to be a promising procedure to control rebleeding bringing only minimal trauma and bleeding. In this trial, we intend to compare laparoscopic therapy plus propranolol to endoscopic therapy plus propranolol, the first-line therapy currently recommended by international guidelines, to evaluate the effectiveness and safety of laparoscopic therapy for secondary prevention of cirrhotic patients with history of gastroesophageal variceal bleeding.

### **Design and interventions**

This is a prospective, multicenter randomized controlled trial. 40 participants will be recruited in this trial.

Appropriate participants will be invited by the investigators according to the inclusion



1  
2  
3  
4 and exclusion criteria and randomly assigned to the endoscopic group or the  
5  
6 laparoscopic group. Participants in the endoscopic group will receive endoscopic  
7  
8 therapy plus propranolol and those in the laparoscopic group will receive laparoscopic  
9  
10 therapy plus propranolol. For participants assigned to the endoscopic group, either of  
11  
12 the procedures including endoscopic variceal ligation, cyanoacrylate glue injection  
13  
14 and sclerotherapy. Decision of which procedure to be adopt for each participant will  
15  
16 be individually made by experienced specialist according to the condition of the  
17  
18 varices. Nevertheless, EVL will be considered the first option when there are multiple  
19  
20 appropriate procedures as recommended by international guidelines.  
21  
22

### 23 **Term and procedure**

24  
25 During the trial, the staff will perform corresponding procedure for the participants  
26  
27 according to the assignation after necessary tests and data collection been performed.  
28  
29 Propranolol administration will start since assignation. The term of the trial for each  
30  
31 participant will be 60 weeks. Follow-up will take place on week 12, 24, 36,48 and 60  
32  
33 since enrollment. The following data will be collected during the procedure:

- 34 ■ General information: gender, date of birth, height, weight, ethnic.
- 35  
36 ■ Clinical data: type of portal hypertension, etiology for cirrhosis, co-morbidity,  
37  
38 combined medication, time of bleeding.
- 39  
40 ■ Test results: blood routine, blood coagulation, liver function,  
41  
42 esophagogastroduodenoscopy, renal function, Color Doppler ultrasound,  
43  
44 abdominal CT, electrocardiogram, transient elastography, QOL score, KPS score,  
45  
46 etc.
- 47  
48 ■ Adjustment records of dosage of propranolol, adverse events and severe adverse  
49  
50 events.  
51  
52

### 53 **Possible conflict of interest**

54  
55 The trial has no possible conflict of interest with participants.  
56  
57  
58  
59

### 60 **Possible merits**

1  
2  
3  
4 All participants will receive either endoscopic therapy or laparoscopic therapy, plus  
5 propranolol oral administration. Either therapy is widely performed and accepted and  
6 may lower rebleeding rate and improve survival and life of quality. Furthermore, all  
7 clinical events the participants will be carefully monitored and managed by the staff.  
8  
9  
10  
11  
12

### 13 **Possible risks**

14  
15 Possible risks include complications of endoscopic therapy (including but not limited  
16 to nausea, vomit, ferverescence, esophagostenosis, esophageal ulcer, dysphagia and  
17 early rebleeding), laparoscopic therapy (including but not limited to intraoperative  
18 hemorrhage, portal vein thrombosis, subphrenic infection, pancreatic fistula and early  
19 rebleeding) and side-effects of propranolol. All clinical events will be carefully  
20 monitored and managed by the staff in order to minimize possible risks.  
21  
22  
23  
24  
25  
26  
27  
28

29 Upon occurrence of safety issues during the process, the trial will be terminated, and  
30 necessary medical procedures will be performed for participants suffering from  
31 research related adverse effect. If the reason is confirmed to be non-human factors,  
32 the trial will be announced failure.  
33  
34  
35  
36  
37  
38

### 39 **Confidentiality**

40 The individual privacy of participants will be carefully preserved during the trial. The  
41 Food and Drug Administration and Ethics Committee have the right to censor the  
42 materials related to the participants when necessary. Any private information of  
43 participants will not be disclosed upon publication of the result of this study.  
44  
45  
46  
47  
48  
49

### 50 **Voluntarity**

51 The participation and exit of this study is of completely voluntary. Participants have  
52 the right to exit the study at any time without getting penalized, discriminated or  
53 retaliated of any form. Nevertheless, the research group strongly recommend all  
54 participants to cooperate and complete the process.  
55  
56  
57  
58  
59  
60

1  
2  
3  
4 The process of a participant may be terminated by the investigator if the participant  
5 requests other diagnosis or treatment, failed to comply to the plan or for any other  
6 reasonable cause.  
7  
8  
9

### 10 11 **Ethics approval**

12  
13 This study has been reported to the ethics committee of XXX hospital and been  
14 approved after thorough investigation on ethical issues. Please contact the ethics  
15 committee upon any ethical concerns.  
16  
17  
18  
19

20  
21 **If you have read and fully understood the above items and agree to participate,**  
22 **please sign the statements below.**  
23  
24  
25  
26  
27  
28  
29  
30  
31  
32  
33  
34  
35  
36  
37  
38  
39  
40  
41  
42  
43  
44  
45  
46  
47  
48  
49  
50  
51  
52  
53  
54  
55  
56  
57  
58  
59  
60

## Statements

### Statement of participant

I have carefully read and understood the contents of this informed consent form. I have the chance to question to the investigators and all questions have been answered. I understand that my participation is of completely voluntary. I agree that related medical data to be used for research and publication. I understand that I have the right to exit the study at any time without getting penalized, discriminated or retaliated, in which case my subsequent medical treatment will not be affected.

If I request other diagnosis or treatment, failed to comply to the plan or for any other reasonable cause, the investigators have the right to terminate my participation. I volunteer to participate in this trial and I will receive a copy of signed informed consent form.

Participant: \_\_\_\_\_

Data: \_\_\_\_\_ Time: \_\_\_\_\_ : \_\_\_\_\_

The legal guardian of the participant or an impartial witness should sign in the case of incapability of the participant to sign for any reason.

Legal guardian/impartial witness: \_\_\_\_\_

Relationship with the participant: \_\_\_\_\_

Data: \_\_\_\_\_ Time: \_\_\_\_\_ : \_\_\_\_\_

### Statement of investigator

I have accurately informed the participant about this informed consent form and responded to all questions asked. The participant volunteer to participate in this trial.

Investigator: \_\_\_\_\_

Data: \_\_\_\_\_ Time: \_\_\_\_\_ : \_\_\_\_\_

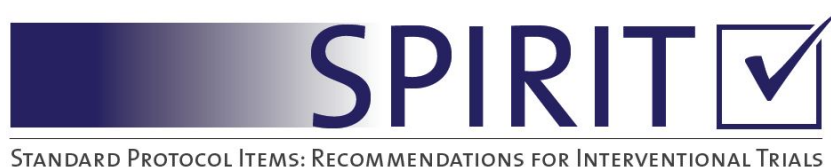

STANDARD PROTOCOL ITEMS: RECOMMENDATIONS FOR INTERVENTIONAL TRIALS

SPIRIT 2013 Checklist: Recommended items to address in a clinical trial protocol and related documents\*

| Section/item                                                  | Item No | Description                                                                                                                                                                                                                                                                              |
|---------------------------------------------------------------|---------|------------------------------------------------------------------------------------------------------------------------------------------------------------------------------------------------------------------------------------------------------------------------------------------|
| <b>Administrative information</b>                             |         |                                                                                                                                                                                                                                                                                          |
| Title (P 1/line 3)                                            | 1       | Descriptive title identifying the study design, population, interventions, and, if applicable, trial acronym                                                                                                                                                                             |
| Trial registration (P 3/line 65)                              | 2a      | Trial identifier and registry name. If not yet registered, name of intended registry                                                                                                                                                                                                     |
|                                                               | 2b      | All items from the World Health Organization Trial Registration Data Set                                                                                                                                                                                                                 |
| Protocol version                                              | 3       | Date and version identifier                                                                                                                                                                                                                                                              |
| Funding (P 15/line 386)                                       | 4       | Sources and types of financial, material, and other support                                                                                                                                                                                                                              |
| Roles and responsibilities (P 14/line 369)<br>(P 15/line 390) | 5a      | Names, affiliations, and roles of protocol contributors                                                                                                                                                                                                                                  |
|                                                               | 5b      | Name and contact information for the trial sponsor                                                                                                                                                                                                                                       |
|                                                               | 5c      | Role of study sponsor and funders, if any, in study design; collection, management, analysis, and interpretation of data; writing of the report; and the decision to submit the report for publication, including whether they will have ultimate authority over any of these activities |
|                                                               | 5d      | Composition, roles, and responsibilities of the coordinating centre, steering committee, endpoint adjudication committee, data management team, and other individuals or groups overseeing the trial, if applicable (see Item 21a for data monitoring committee)                         |
| <b>Introduction</b>                                           |         |                                                                                                                                                                                                                                                                                          |
| Background and rationale (P 4/line 84)                        | 6a      | Description of research question and justification for undertaking the trial, including summary of relevant studies (published and unpublished) examining benefits and harms for each intervention                                                                                       |
|                                                               | 6b      | Explanation for choice of comparators                                                                                                                                                                                                                                                    |
| Objectives (P 5/line 123)                                     | 7       | Specific objectives or hypotheses                                                                                                                                                                                                                                                        |

1  
2  
3  
4  
5  
6  
7  
8  
9  
10  
11  
12  
13  
14  
15  
16  
17  
18  
19  
20  
21  
22  
23  
24  
25  
26  
27  
28  
29  
30  
31  
32  
33  
34  
35  
36  
37  
38  
39  
40  
41  
42  
43  
44  
45  
46  
47  
48  
49  
50  
51  
52  
53  
54  
55  
56  
57  
58  
59  
60

|                             |   |                                                                                                                                                                                                           |
|-----------------------------|---|-----------------------------------------------------------------------------------------------------------------------------------------------------------------------------------------------------------|
| Trial design (P 6/line 139) | 8 | Description of trial design including type of trial (eg, parallel group, crossover, factorial, single group), allocation ratio, and framework (eg, superiority, equivalence, noninferiority, exploratory) |
|-----------------------------|---|-----------------------------------------------------------------------------------------------------------------------------------------------------------------------------------------------------------|

### Methods: Participants, interventions, and outcomes

|                              |   |                                                                                                                                                                                    |
|------------------------------|---|------------------------------------------------------------------------------------------------------------------------------------------------------------------------------------|
| Study setting (P 6/line 139) | 9 | Description of study settings (eg, community clinic, academic hospital) and list of countries where data will be collected. Reference to where list of study sites can be obtained |
|------------------------------|---|------------------------------------------------------------------------------------------------------------------------------------------------------------------------------------|

|                                     |    |                                                                                                                                                                                              |
|-------------------------------------|----|----------------------------------------------------------------------------------------------------------------------------------------------------------------------------------------------|
| Eligibility criteria (P 6/line 147) | 10 | Inclusion and exclusion criteria for participants. If applicable, eligibility criteria for study centres and individuals who will perform the interventions (eg, surgeons, psychotherapists) |
|-------------------------------------|----|----------------------------------------------------------------------------------------------------------------------------------------------------------------------------------------------|

|                              |     |                                                                                                                            |
|------------------------------|-----|----------------------------------------------------------------------------------------------------------------------------|
| Interventions (P 7/line 184) | 11a | Interventions for each group with sufficient detail to allow replication, including how and when they will be administered |
|------------------------------|-----|----------------------------------------------------------------------------------------------------------------------------|

|  |     |                                                                                                                                                                                                |
|--|-----|------------------------------------------------------------------------------------------------------------------------------------------------------------------------------------------------|
|  | 11b | Criteria for discontinuing or modifying allocated interventions for a given trial participant (eg, drug dose change in response to harms, participant request, or improving/worsening disease) |
|--|-----|------------------------------------------------------------------------------------------------------------------------------------------------------------------------------------------------|

|  |     |                                                                                                                                                   |
|--|-----|---------------------------------------------------------------------------------------------------------------------------------------------------|
|  | 11c | Strategies to improve adherence to intervention protocols, and any procedures for monitoring adherence (eg, drug tablet return, laboratory tests) |
|--|-----|---------------------------------------------------------------------------------------------------------------------------------------------------|

|  |     |                                                                                               |
|--|-----|-----------------------------------------------------------------------------------------------|
|  | 11d | Relevant concomitant care and interventions that are permitted or prohibited during the trial |
|--|-----|-----------------------------------------------------------------------------------------------|

|                         |    |                                                                                                                                                                                                                                                                                                                                                                                |
|-------------------------|----|--------------------------------------------------------------------------------------------------------------------------------------------------------------------------------------------------------------------------------------------------------------------------------------------------------------------------------------------------------------------------------|
| Outcomes (P 8/line 213) | 12 | Primary, secondary, and other outcomes, including the specific measurement variable (eg, systolic blood pressure), analysis metric (eg, change from baseline, final value, time to event), method of aggregation (eg, median, proportion), and time point for each outcome. Explanation of the clinical relevance of chosen efficacy and harm outcomes is strongly recommended |
|-------------------------|----|--------------------------------------------------------------------------------------------------------------------------------------------------------------------------------------------------------------------------------------------------------------------------------------------------------------------------------------------------------------------------------|

|                                     |    |                                                                                                                                                                                  |
|-------------------------------------|----|----------------------------------------------------------------------------------------------------------------------------------------------------------------------------------|
| Participant timeline (P 9/line 228) | 13 | Time schedule of enrolment, interventions (including any run-ins and washouts), assessments, and visits for participants. A schematic diagram is highly recommended (see Figure) |
|-------------------------------------|----|----------------------------------------------------------------------------------------------------------------------------------------------------------------------------------|

|                             |    |                                                                                                                                                                                       |
|-----------------------------|----|---------------------------------------------------------------------------------------------------------------------------------------------------------------------------------------|
| Sample size (P 11/line 267) | 14 | Estimated number of participants needed to achieve study objectives and how it was determined, including clinical and statistical assumptions supporting any sample size calculations |
|-----------------------------|----|---------------------------------------------------------------------------------------------------------------------------------------------------------------------------------------|

|                            |    |                                                                                     |
|----------------------------|----|-------------------------------------------------------------------------------------|
| Recruitment (P 7/line 167) | 15 | Strategies for achieving adequate participant enrolment to reach target sample size |
|----------------------------|----|-------------------------------------------------------------------------------------|

### Methods: Assignment of interventions (for controlled trials)

|                            |  |  |
|----------------------------|--|--|
| Allocation: (P 7/line 176) |  |  |
|----------------------------|--|--|

|    |                |     |                                                                         |
|----|----------------|-----|-------------------------------------------------------------------------|
| 1  |                |     |                                                                         |
| 2  | Sequence       | 16a | Method of generating the allocation sequence (eg, computer-             |
| 3  | generation     |     | generated random numbers), and list of any factors for stratification.  |
| 4  |                |     | To reduce predictability of a random sequence, details of any planned   |
| 5  |                |     | restriction (eg, blocking) should be provided in a separate document    |
| 6  |                |     | that is unavailable to those who enrol participants or assign           |
| 7  |                |     | interventions                                                           |
| 8  |                |     |                                                                         |
| 9  |                |     |                                                                         |
| 10 | Allocation     | 16b | Mechanism of implementing the allocation sequence (eg, central          |
| 11 | concealment    |     | telephone; sequentially numbered, opaque, sealed envelopes),            |
| 12 | mechanism      |     | describing any steps to conceal the sequence until interventions are    |
| 13 |                |     | assigned                                                                |
| 14 |                |     |                                                                         |
| 15 | Implementation | 16c | Who will generate the allocation sequence, who will enrol participants, |
| 16 |                |     | and who will assign participants to interventions                       |
| 17 |                |     |                                                                         |
| 18 |                |     |                                                                         |
| 19 | Blinding       | 17a | Who will be blinded after assignment to interventions (eg, trial        |
| 20 | (masking)      |     | participants, care providers, outcome assessors, data analysts), and    |
| 21 |                |     | how                                                                     |
| 22 |                |     |                                                                         |
| 23 |                | 17b | If blinded, circumstances under which unblinding is permissible, and    |
| 24 |                |     | procedure for revealing a participant's allocated intervention during   |
| 25 |                |     | the trial                                                               |
| 26 |                |     |                                                                         |
| 27 |                |     |                                                                         |

### Methods: Data collection, management, and analysis

|    |                   |     |                                                                          |
|----|-------------------|-----|--------------------------------------------------------------------------|
| 28 |                   |     |                                                                          |
| 29 |                   |     |                                                                          |
| 30 | Data collection   | 18a | Plans for assessment and collection of outcome, baseline, and other      |
| 31 | methods (P 9/line |     | trial data, including any related processes to promote data quality (eg, |
| 32 | 230)              |     | duplicate measurements, training of assessors) and a description of      |
| 33 |                   |     | study instruments (eg, questionnaires, laboratory tests) along with      |
| 34 |                   |     | their reliability and validity, if known. Reference to where data        |
| 35 |                   |     | collection forms can be found, if not in the protocol                    |
| 36 |                   |     |                                                                          |
| 37 |                   |     |                                                                          |
| 38 |                   | 18b | Plans to promote participant retention and complete follow-up,           |
| 39 |                   |     | including list of any outcome data to be collected for participants who  |
| 40 |                   |     | discontinue or deviate from intervention protocols                       |
| 41 |                   |     |                                                                          |
| 42 | Data              | 19  | Plans for data entry, coding, security, and storage, including any       |
| 43 | management (P     |     | related processes to promote data quality (eg, double data entry;        |
| 44 | 12/ line 310)     |     | range checks for data values). Reference to where details of data        |
| 45 |                   |     | management procedures can be found, if not in the protocol               |
| 46 |                   |     |                                                                          |
| 47 |                   |     |                                                                          |
| 48 | Statistical       | 20a | Statistical methods for analysing primary and secondary outcomes.        |
| 49 | methods (P        |     | Reference to where other details of the statistical analysis plan can be |
| 50 | 13/line 318)      |     | found, if not in the protocol                                            |
| 51 |                   |     |                                                                          |
| 52 |                   | 20b | Methods for any additional analyses (eg, subgroup and adjusted           |
| 53 |                   |     | analyses)                                                                |
| 54 |                   |     |                                                                          |
| 55 |                   | 20c | Definition of analysis population relating to protocol non-adherence     |
| 56 |                   |     | (eg, as randomised analysis), and any statistical methods to handle      |
| 57 |                   |     | missing data (eg, multiple imputation)                                   |
| 58 |                   |     |                                                                          |
| 59 |                   |     |                                                                          |
| 60 |                   |     |                                                                          |





|                                                                   |                                            |     |                                                                                                                                                                                                                                                                                     |
|-------------------------------------------------------------------|--------------------------------------------|-----|-------------------------------------------------------------------------------------------------------------------------------------------------------------------------------------------------------------------------------------------------------------------------------------|
| 1<br>2<br>3<br>4<br>5<br>6<br>7<br>8<br>9<br>10<br>11<br>12<br>13 | Dissemination<br>policy (P 11/line<br>281) | 31a | Plans for investigators and sponsor to communicate trial results to participants, healthcare professionals, the public, and other relevant groups (eg, via publication, reporting in results databases, or other data sharing arrangements), including any publication restrictions |
|                                                                   |                                            | 31b | Authorship eligibility guidelines and any intended use of professional writers                                                                                                                                                                                                      |
|                                                                   |                                            | 31c | Plans, if any, for granting public access to the full protocol, participant-level dataset, and statistical code                                                                                                                                                                     |

## Appendices

|                                                                      |                                                          |    |                                                                                                                                                                                                |
|----------------------------------------------------------------------|----------------------------------------------------------|----|------------------------------------------------------------------------------------------------------------------------------------------------------------------------------------------------|
| 14<br>15<br>16<br>17<br>18<br>19<br>20<br>21<br>22<br>23<br>24<br>25 | Informed consent<br>materials<br>(supplementary<br>file) | 32 | Model consent form and other related documentation given to participants and authorised surrogates                                                                                             |
| 22<br>23<br>24<br>25                                                 | Biological<br>specimens                                  | 33 | Plans for collection, laboratory evaluation, and storage of biological specimens for genetic or molecular analysis in the current trial and for future use in ancillary studies, if applicable |

---

\*It is strongly recommended that this checklist be read in conjunction with the SPIRIT 2013 Explanation & Elaboration for important clarification on the items. Amendments to the protocol should be tracked and dated. The SPIRIT checklist is copyrighted by the SPIRIT Group under the Creative Commons "[Attribution-NonCommercial-NoDerivs 3.0 Unported](https://creativecommons.org/licenses/by-nc-nd/3.0/)" license.

# BMJ Open

## Hepatic venous pressure gradient-guided laparoscopic splenectomy and pericardial devascularization versus endoscopic therapy for variceal rebleeding in portal hypertension (CHESS1803): Study protocol of a multicenter randomized controlled trial

|                                 |                                                                                                                                                                                                                                                                                                                                                                                                                                                                                                                                                                                                                                                                                                                                                                                                                                                                                                                                                                                                                                                                                                                                                                                                                                                                                                                                                                                                                                                                                                                                                                                                                                                                           |
|---------------------------------|---------------------------------------------------------------------------------------------------------------------------------------------------------------------------------------------------------------------------------------------------------------------------------------------------------------------------------------------------------------------------------------------------------------------------------------------------------------------------------------------------------------------------------------------------------------------------------------------------------------------------------------------------------------------------------------------------------------------------------------------------------------------------------------------------------------------------------------------------------------------------------------------------------------------------------------------------------------------------------------------------------------------------------------------------------------------------------------------------------------------------------------------------------------------------------------------------------------------------------------------------------------------------------------------------------------------------------------------------------------------------------------------------------------------------------------------------------------------------------------------------------------------------------------------------------------------------------------------------------------------------------------------------------------------------|
| Journal:                        | <i>BMJ Open</i>                                                                                                                                                                                                                                                                                                                                                                                                                                                                                                                                                                                                                                                                                                                                                                                                                                                                                                                                                                                                                                                                                                                                                                                                                                                                                                                                                                                                                                                                                                                                                                                                                                                           |
| Manuscript ID                   | bmjopen-2019-030960.R1                                                                                                                                                                                                                                                                                                                                                                                                                                                                                                                                                                                                                                                                                                                                                                                                                                                                                                                                                                                                                                                                                                                                                                                                                                                                                                                                                                                                                                                                                                                                                                                                                                                    |
| Article Type:                   | Protocol                                                                                                                                                                                                                                                                                                                                                                                                                                                                                                                                                                                                                                                                                                                                                                                                                                                                                                                                                                                                                                                                                                                                                                                                                                                                                                                                                                                                                                                                                                                                                                                                                                                                  |
| Date Submitted by the Author:   | 02-Jul-2019                                                                                                                                                                                                                                                                                                                                                                                                                                                                                                                                                                                                                                                                                                                                                                                                                                                                                                                                                                                                                                                                                                                                                                                                                                                                                                                                                                                                                                                                                                                                                                                                                                                               |
| Complete List of Authors:       | <p>Shao, Ruoyang; Southern Medical University Nanfang Hospital, Department of Hepatology Unit and Infectious Diseases<br/> Zuo, Changzeng; Department of Hepatobiliary Surgery, Xingtai Institute of Cancer Control<br/> Li, Zhiwei; Department of Hepatobiliary Surgery, Xingtai Institute of Cancer Control<br/> Qi, Ruizhao; Department of General Surgery, The Fifth Medical Center of PLA General Hospital<br/> Liu, Qingbo; CHESS, Department of Hepatobiliary Surgery, Shunde Hospital, Southern Medical University<br/> Zhang, Weijie; CHESS, Department of Hepatobiliary Surgery, Shunde Hospital, Southern Medical University<br/> Mao, Xiaorong; CHESS Frontier Center Working Party, The First Hospital of Lanzhou University, Lanzhou University<br/> Song, Xiaojing; CHESS Frontier Center Working Party, The First Hospital of Lanzhou University, Lanzhou University<br/> Li, Lei; CHESS Frontier Center Working Party, The First Hospital of Lanzhou University, Lanzhou University<br/> Wang, Jitao; Xingtai People's Hospital, Xingtai, China, Department of Hepatobiliary Surgery<br/> Liu, Yanna; Southern Medical University Nanfang Hospital, Department of Hepatology Unit and Infectious Diseases<br/> Zhao, Xin; Department of Hepatobiliary Surgery, The Third People's Hospital of Shenzhen<br/> Liu, Chuan; Nanfang Hospital, Southern Medical University, Department of General Surgery<br/> Li, Xun; The First Hospital of Lanzhou University<br/> Wang, Weidong; Shunde Hospital, Southern Medical University, Department of Hepatobiliary Surgery<br/> Qi, Xiaolong; The First Hospital of Lanzhou University, CHESS Frontier Center</p> |
| <b>Primary Subject Heading</b>: | Gastroenterology and hepatology                                                                                                                                                                                                                                                                                                                                                                                                                                                                                                                                                                                                                                                                                                                                                                                                                                                                                                                                                                                                                                                                                                                                                                                                                                                                                                                                                                                                                                                                                                                                                                                                                                           |
| Secondary Subject Heading:      | Gastroenterology and hepatology, Surgery, Research methods                                                                                                                                                                                                                                                                                                                                                                                                                                                                                                                                                                                                                                                                                                                                                                                                                                                                                                                                                                                                                                                                                                                                                                                                                                                                                                                                                                                                                                                                                                                                                                                                                |

1  
2  
3  
4  
5  
6  
7  
8  
9  
10  
11  
12  
13  
14  
15  
16  
17  
18  
19  
20  
21  
22  
23  
24  
25  
26  
27  
28  
29  
30  
31  
32  
33  
34  
35  
36  
37  
38  
39  
40  
41  
42  
43  
44  
45  
46  
47  
48  
49  
50  
51  
52  
53  
54  
55  
56  
57  
58  
59  
60

|           |                                                                                                                                         |
|-----------|-----------------------------------------------------------------------------------------------------------------------------------------|
| Keywords: | Hepatology < INTERNAL MEDICINE, Hepatobiliary surgery < SURGERY, Endoscopy < GASTROENTEROLOGY, Hepatobiliary disease < GASTROENTEROLOGY |
|           |                                                                                                                                         |

SCHOLARONE™  
Manuscripts



I, the Submitting Author has the right to grant and does grant on behalf of all authors of the Work (as defined in the below author licence), an exclusive licence and/or a non-exclusive licence for contributions from authors who are: i) UK Crown employees; ii) where BMJ has agreed a CC-BY licence shall apply, and/or iii) in accordance with the terms applicable for US Federal Government officers or employees acting as part of their official duties; on a worldwide, perpetual, irrevocable, royalty-free basis to BMJ Publishing Group Ltd ("BMJ") its licensees and where the relevant Journal is co-owned by BMJ to the co-owners of the Journal, to publish the Work in this journal and any other BMJ products and to exploit all rights, as set out in our [licence](#).

The Submitting Author accepts and understands that any supply made under these terms is made by BMJ to the Submitting Author unless you are acting as an employee on behalf of your employer or a postgraduate student of an affiliated institution which is paying any applicable article publishing charge ("APC") for Open Access articles. Where the Submitting Author wishes to make the Work available on an Open Access basis (and intends to pay the relevant APC), the terms of reuse of such Open Access shall be governed by a Creative Commons licence – details of these licences and which [Creative Commons](#) licence will apply to this Work are set out in our licence referred to above.

Other than as permitted in any relevant BMJ Author's Self Archiving Policies, I confirm this Work has not been accepted for publication elsewhere, is not being considered for publication elsewhere and does not duplicate material already published. I confirm all authors consent to publication of this Work and authorise the granting of this licence.

**TITLE PAGE****Title:**

Hepatic venous pressure gradient-guided laparoscopic splenectomy and pericardial devascularization versus endoscopic therapy for variceal rebleeding in portal hypertension (CHESS1803): Study protocol of a multicenter randomized controlled trial

**Authors and Affiliations:**

Ruoyang Shao<sup>1,2\*</sup>, Changzeng Zuo<sup>3\*</sup>, Zhiwei Li<sup>4</sup>, Ruizhao Qi<sup>5</sup>, Qingbo Liu<sup>6</sup>, Weijie Zhang<sup>6</sup>, Xiaorong Mao<sup>1</sup>, Xiaojing Song<sup>1</sup>, Lei Li<sup>1</sup>, Jitao Wang<sup>3</sup>, Yanna Liu<sup>1,2</sup>, Xin Zhao<sup>4</sup>, Chuan Liu<sup>1,2</sup>, Xun Li<sup>1</sup>, Weidong Wang<sup>6</sup>, Xiaolong Qi<sup>1</sup>

1. CHESS Center, The First Hospital of Lanzhou University, Lanzhou, China
2. Department of Hepatology Unit and Infectious Diseases, Nanfang Hospital, Southern Medical University, Guangzhou, China
3. Department of Hepatobiliary Surgery, Xingtai Institute of Cancer Control, Xingtai, China
4. Department of Hepatobiliary Surgery, The Third People's Hospital of Shenzhen, Shenzhen, China
5. Department of General Surgery, The Fifth Medical Center of PLA General Hospital, Beijing, China
6. Department of Hepatobiliary Surgery, Shunde Hospital, Southern Medical University, Foshan, China

\* These authors contributed equally to this work.

**Corresponding to:**

Xiaolong Qi, MD

Chair, CHESS (Chinese Portal Hypertension Diagnosis and Monitoring Study Group)

Chief, CHESS Center, The First Hospital of Lanzhou University, Lanzhou, China

E-mail: qixiaolong@vip.163.com

OR

Weidong Wang, MD

1  
2  
3  
4 31 Chief, Department of Hepatobiliary Surgery, Shunde Hospital, Southern Medical University,  
5  
6 32 Foshan, China  
7 33 E-mail: weiweih@126.com  
8  
9 34

10  
11 35 **Keywords:**

12  
13 36 Hepatic venous pressure gradient, variceal rebleeding, randomized controlled trial  
14  
15 37

16  
17 38 **Word count:**

18  
19 39 3205 words  
20  
21  
22  
23  
24  
25  
26  
27  
28  
29  
30  
31  
32  
33  
34  
35  
36  
37  
38  
39  
40  
41  
42  
43  
44  
45  
46  
47  
48  
49  
50  
51  
52  
53  
54  
55  
56  
57  
58  
59  
60

For peer review only

**40 ABSTRACT****41 Introduction**

42 Gastroesophageal variceal bleeding is one of the most common and severe complications  
43 with high mortality in cirrhotic patients who developed portal hypertension. Hepatic venous  
44 pressure gradient (HVPG) is a globally recommended golden standard for portal pressure  
45 assessment and an HVPG  $\geq 16$ mmHg indicates a higher risk of death and rebleeding. This  
46 study aims to compare the effectiveness and safety of splenectomy and pericardial  
47 devascularization (laparoscopic therapy) plus propranolol and endoscopic therapy plus  
48 propranolol for variceal rebleeding in cirrhotic patients with HVPG between 16 and 20  
49 mmHg.

**51 Methods and analysis**

52 This is a multicenter, randomized, controlled, clinical trial. Participants will be 1:1 assigned  
53 randomly into either laparoscopic or endoscopic groups. 40 participants whose transjugular  
54 HVPG lies between 16 and 20 mmHg with a history of gastroesophageal variceal bleeding  
55 will be recruited from three sites in China. Participants will receive either endoscopic therapy  
56 plus propranolol or laparoscopic therapy plus propranolol. The primary outcome measure will  
57 be occurrence of gastroesophageal variceal rebleeding. Secondary outcome measures will  
58 include: overall survival, occurrence of hepatocellular carcinoma, occurrence of venous  
59 thrombosis, occurrence of adverse events, quality of life and tolerability of treatment.  
60 Outcome measures will be evaluated at baseline, 12 weeks, 24 weeks, 36 weeks, 48 weeks  
61 and 60 weeks. Multivariate COX regression model will be introduced for analyses of  
62 occurrence data and Kaplan-Meier analysis with Log-rank test for inter-group comparison.

**64 Ethics and dissemination**

65 Ethical approval was obtained from all three participating sites. Primary and secondary  
66 outcome data will be submitted for publication in peer-reviewed journals and widely  
67 disseminated.

**69 Trial registration number**

1  
2  
3  
4 70 NCT03783065; Pre-results.  
5  
6 71

7  
8 72 **Trial status**

9 73 Recruitment for this study started on December 2018 while the first participant was  
10 74 randomized on January 2019. Recruitment is estimated to stop on October 2019.  
11  
12  
13 75

14  
15 76 **Strengths and limitations of this study**

- 16  
17 77 ■ This study is the first trial that concentrates on the best management on prevention of  
18 78 rebleeding for cirrhotic patients with HVPG between 16 and 20 mmHg.  
19  
20 79 ■ This trial is the first one to compare the effectiveness of laparoscopic therapy plus  
21 80 propranolol to endoscopic therapy plus propranolol recommended by international  
22 81 guidelines.  
23  
24 82 ■ The surgical procedure involved in this study employs minimally invasive laparoscopy  
25 83 instead of conventional operation, minimizing trauma and complications.  
26  
27 84 ■ Limitations of this trial include the lack of accessible data for sample size estimation,  
28 85 potential influence in applicability in other countries due to etiological differences and  
29 86 the relatively short follow-up period.  
30  
31  
32  
33  
34  
35  
36  
37  
38  
39

40 88 **INTRODUCTION**

41 89 Cirrhosis is the result of multiple liver diseases and is accounted as a dynamic process.<sup>1</sup>  
42 90 Portal hypertension is a vital event in the natural progression of cirrhosis that is responsible  
43 91 for decompensating events like gastroesophageal variceal bleeding, ascites and hepatic  
44 92 encephalopathy. Gastroesophageal varices could be seen in about 50% of cirrhotic patients  
45 93 and those who developed variceal bleeding face a mortality of 5-20%.<sup>2,3</sup> Thus, the  
46 94 stratification and applicable secondary prevention for patients with high risk is of great  
47 95 clinical significance.  
48  
49 96 Hepatic venous pressure gradient (HVPG) is the difference between the wedged hepatic  
50 97 venous pressure and free hepatic venous pressure.<sup>4</sup> Eliminating the influence of abdominal  
51 98 pressure, HVPG is currently the most widely accepted reflection of portal pressure, and has  
52 99 been demonstrated to have good performances in risk stratification<sup>3,5</sup> and predicting the



1  
2  
3  
4 100 response to treatments.<sup>6 7</sup> An HVPG over 12 mmHg suggests the occurrence of  
5  
6 101 gastroesophageal variceal bleeding.<sup>8</sup> Patients with HVPG over 16mmHg face higher risk of  
7  
8 102 death<sup>8-11</sup> and rebleeding,<sup>6</sup> while an HVPG over 20 mmHg predicts failure to control  
9  
10 103 bleeding, early rebleeding, and death due to acute variceal hemorrhage.<sup>12 13</sup> Currently,  
11  
12 104 international guidelines recommend endoscopic therapy combined with non-selective beta-  
13  
14 105 blockers to be the first-line therapy of secondary prevention for cirrhotic patients with  
15  
16 106 gastroesophageal variceal bleeding.<sup>3 5</sup> Nevertheless, patients with high HVPG still suffer  
17  
18 107 from risk of treatment failure. Recent years, early transjugular intrahepatic portal-systemic  
19  
20 108 shunts is recommended as a better choice for patients with HVPG  $\geq$  20 mmHg,<sup>14 15</sup> while  
21  
22 109 there still lack a strong evidence to determine the best method for patients with HVPG  
23  
24 110 between 16 and 20 mmHg.  
25  
26 111 Splenectomy and pericardial devascularization, first performed by Hassab,<sup>16 17</sup> is a promising  
27  
28 112 surgical procedure for cirrhotic patients with gastroesophageal variceal bleeding, especially  
29  
30 113 for those with hypersplenism. With the rapid advance of laparoscopic techniques, since the  
31  
32 114 first laparoscopic splenectomy was reported in 1991,<sup>18</sup> post-operational complications which  
33  
34 115 used to be a major concern of Hassab's operation have been cut down to a great extent due to  
35  
36 116 less invasive procedures.<sup>19</sup> Laparoscopic splenectomy and pericardial devascularization  
37  
38 117 (laparoscopic therapy) has been widely accepted for variceal bleeding in Asia-pacific  
39  
40 118 countries, where the predominant etiology of cirrhosis is hepatitis B virus infection<sup>20</sup>  
41  
42 119 combined with very high occurrence of hypersplenism.<sup>21</sup> However, there haven't been any  
43  
44 120 prospective trials comparing the effectiveness of laparoscopic therapy plus propranolol to the  
45  
46 121 internationally recommended first-line therapy. Also, the precise indication to perform  
47  
48 122 laparoscopic therapy is still unclear.  
49  
50 123 In this study, the outcomes of recruited patients whose HVPG lies within 16 and 20 mmHg  
51  
52 124 will be compared to explore the optimized management. Taking into consideration the  
53  
54 125 preferred performance of HVPG in risk stratification and the lack of prospective study in  
55  
56 126 long-term performance of laparoscopic therapy, this trial will be meaningful for both the  
57  
58 127 extension of HVPG risk stratification and the clarification of laparoscopic therapy indication.  
59  
60

## 129 **Objectives**

1  
2  
3  
4 130 The aim of this trial is to assess the effectiveness and safety of laparoscopic therapy plus  
5  
6 131 propranolol as first-line therapy of variceal rebleeding prevention for cirrhotic patients whose  
7  
8 132 transjugular HVPG lies between 16 and 20 mmHg with gastroesophageal variceal bleeding  
9  
10 133 compared with endoscopic therapy plus propranolol. The primary outcome will be variceal  
11  
12 134 rebleeding. Secondary outcomes include: death, hepatocellular carcinoma, venous  
13  
14 135 thrombosis, adverse events, quality of life and tolerability of treatment. We hypothesise that:  
15  
16 136 1. Compared to endoscopic therapy plus propranolol, laparoscopic therapy plus propranolol is  
17  
18 137 more effective in reducing variceal rebleeding.  
19  
20 138 2. Participants receiving laparoscopic therapy plus propranolol show non-inferior overall  
21  
22 139 survival and lower occurrence of hepatocellular carcinoma over those who receiving  
23  
24 140 endoscopic therapy plus propranolol.  
25  
26 141 3. The occurrence of venous thrombosis and adverse events and QOL and KPS scores are  
27  
28 142 without significant difference between two groups.  
29  
30 143

## 31 144 **METHODS AND ANALYSIS**

### 32 145 **Study design**

33  
34 146 This study is a multicenter, prospective, randomized controlled clinical trial. The overview of  
35  
36 147 the study process is illustrated in Figure 1. After screened for eligibility and measurement of  
37  
38 148 HVPG, the participants will be randomly allocated to laparoscopic group or endoscopic  
39  
40 149 group. After the operative intervention, there will be a 60-week follow-up period. All tests  
41  
42 150 and interventions will be performed at three involved centers in China: (1) Shunde Hospital,  
43  
44 151 Southern Medical University, (2) Xingtai People's Hospital and (3) The First Hospital of  
45  
46 152 Lanzhou University.  
47  
48 153

### 49 154 **Eligibility criteria**

#### 50 155 **Inclusion criteria**

51  
52 156 Eligible participants should be (a) aged between 18 to 75 years, (b) clinically and/or  
53  
54 157 pathologically diagnosed cirrhosis with portal hypertension, (c) with a history of  
55  
56 158 gastroesophageal variceal bleeding (melena, hematemesis etc.), without receiving  
57  
58 159 splenectomy or any secondary prevention, (d) screened with transjugular HVPG between 16

1  
2  
3  
4 160 and 20 mmHg after hospitalization, (e) with Eastern Cooperative Oncology Group (ECOG)  
5 161 score  $\leq 2$  and Karnofsky performance status (KPS) score  $\geq 60$  during screening, (f) assessed  
6 162 to be Child-Pugh class A or B, and (g) voluntarily participate in the study and able to provide  
7  
8 163 written informed consent and able to understand and willing to comply with the requirements  
9  
10 164 of the study.  
11  
12  
13  
14 165

#### 15 166 Exclusion criteria

16 167 Those who conforms to any of the following would be excluded: (a) pregnant or  
17 168 breastfeeding women, (b) with prior known or suspected malignancy (hepatocellular  
18 169 carcinoma, cholangiocarcinoma etc.), (c) with limited coagulation situation (Quick  $< 50\%$ ,  
19 170 partial thromboplastin time (PTT)  $> 50$  sec, platelet count  $< 50000 / \mu\text{l}$  or qualitative platelet  
20 171 dysfunction that affects conglutination function of congenital (Bernard-Soulier syndrome,  
21 172 Glanzmann thrombasthenia, storagepool disease, aspirin-like defects, platelet-type Von  
22 173 Willebrand disease, etc) or acquired (medication or other systemic diseases) causes), (d) with  
23 174 massive ascites, (e) assessed to be Child-Pugh class C, (f) refusing or inadequate for  
24 175 transjugular HVPG measurement, (g) with active bleeding upon screening and (h) with other  
25 176 situations whose existence judged inadequate for participation by the investigators.  
26  
27  
28  
29  
30  
31  
32  
33  
34  
35  
36  
37  
38

#### 39 178 **Recruitment**

40 179 Recruitment has started in December 2018 and will continue until the intent sample size has  
41 180 been reached. Participants ( $n = 40$ ) from China are recruited in three sites through (1) posters,  
42 181 which show the condition of the trial, (2) social media (ie, websites, WeChat) and (3) the  
43 182 advice of the doctors.  
44  
45  
46  
47  
48  
49

#### 50 184 **Patient and public involvement**

51 185 Patients and public were not involved in the design and development of the study.  
52  
53  
54  
55

#### 56 187 **Randomization**

57 188 Eligible patients will be randomly allocated (1:1) to either the laparoscopic group or the  
58 189 endoscopic group after signing on an informed consent, before which the patients will be  
59  
60

1  
2  
3  
4 190 informed about the trial in detail. The groups will be stratified by Child-Pugh class, age ( $\leq 60$   
5  
6 191 years or  $> 60$  years) and gender. For the randomization, the randPack package of R  
7  
8 192 software (R Project for Statistical Computing, Vienna, Austria) will be introduced. The  
9  
10 193 randomization will be generated by a statistician independent of the study.

11  
12 194

### 13 195 **HVPG measurement**

15 196 Transjugular HVPG measurement will be performed for all participants when screening for  
16  
17 197 eligibility by experienced interventional radiologists. The procedure will be performed using  
18  
19 198 a balloon catheter with a pressure transducer at the tip (Edwards Lifesciences, Irvine,  
20  
21 199 California). At first, a zero measurement will be made with the transducer open to air. After  
22  
23 200 transjugular catheterization, free hepatic venous pressure will be measured in the right  
24  
25 201 hepatic vein at about 1-3 cm from the inferior vena cava. Then, the right hepatic vein will be  
26  
27 202 occluded completely by the inflated balloon, after which will the wedged hepatic venous  
28  
29 203 pressure be measured. The measurement will be continued until the pressure reach a plateau.  
30  
31 204 Measurements will be performed in at least triplicate, and the average value will be used.  
32  
33 205 HVPG is the difference between wedged hepatic venous pressure and free hepatic venous  
34  
35 206 pressure.

36  
37 207

### 38 208 **Operative interventions**

40 209 All operative interventions will be performed by trained and experienced specialists affiliated  
41  
42 210 to the university centers. Doppler ultrasonography, computed tomography (CT),  
43  
44 211 electrocardiogram and esophagogastroduodenoscopy will be performed routinely pre-  
45  
46 212 operation.

47  
48 213

50 214 Participants assigned to the laparoscopic group will undergo laparoscopic therapy within 48h  
51  
52 215 after randomization. Laparoscopic therapy will be performed as previously described.<sup>20</sup>  
53  
54 216 General anesthesia will be applied for all participants. Major procedures of the operation  
55  
56 217 include splenectomy and the dissection and ligation of short gastric vessels, posterior gastric  
57  
58 218 vessels and all branches of proximal lesser curvature, cardia and lower 6 to 8 cm part of  
59  
60 219 abdominal esophagus from the stomach coronary vein. During the process of

220 devascularization, the high esophageal branches and heterotopic high esophageal branches  
221 will be carefully screened.

222  
223 Participants assigned to the endoscopic group will undergo initial endoscopic therapy within  
224 48h after randomization. Candidate procedures for endoscopic therapy include endoscopic  
225 variceal ligation (EVL), cyanoacrylate glue injection and sclerotherapy. Decision of which  
226 procedure to adopt will be made by experienced specialist according to the condition of the  
227 participant, while EVL will be considered the first option as recommended by guidelines.<sup>3 5</sup>  
228 Treatments will be performed again every 1-2 week until completely eradication of varices.

### 230 **Propranolol oral administration**

231 Participants assigned to both groups will begin to receive propranolol after the  
232 randomization. Propranolol shall be administrated orally while keeping monitoring the heart  
233 rate and blood pressure daily, starting from 20-40 mg b.i.d and adjusting every 2 or 3 days  
234 (maximum dose: 320 mg/d for participants without ascites, 160 mg/d for participants with  
235 ascites) to achieve a resting heart rate of 55-60 beats/min while the systolic blood pressure  
236 maintain > 90 mmHg.<sup>5</sup> The dose can always be adjusted according to the response on  
237 participants.

### 239 **Outcomes and assessments**

#### 240 **Primary outcome**

241 In order to compare the effectiveness of laparoscopic group with endoscopic group, the  
242 primary outcome of the study is set to be variceal rebleeding. Endpoints will be 1-year  
243 rebleeding rate and rebleeding time.

#### 245 **Secondary outcomes**

246 Secondary outcomes include: death, hepatocellular carcinoma, venous thrombosis, adverse  
247 events, quality of life and tolerability of treatment. Following endpoints will be applied,  
248 respectively: (1) overall survival, (2) the occurrence of hepatocellular carcinoma, (3) the  
249 occurrence of venous thrombosis, (4) the occurrence of adverse events, (5) quality of life

(QOL) score and (6) KPS score. Occurrence of adverse events, QOL score and KPS score are treated as the reflection of safety and tolerability of treatment. Length stay and intra-hospital mortality will be recorded also to this end and treated as outcome candidates. Also, serum markers will be introduced for monitor of change on liver functions and compared between two groups.

**Table 1 Assessments and time points**

| Assessment                 | Time points   |                |     |     |     |     |     |
|----------------------------|---------------|----------------|-----|-----|-----|-----|-----|
|                            | Pre-operation | Post-operation | 12w | 24w | 36w | 48w | 60w |
| HVPG measurement           | x             |                |     |     |     |     |     |
| Laboratory tests           | x             |                | x   | x   | x   | x   | x   |
| Color Doppler ultrasound   | x             |                |     |     |     |     |     |
| Liver stiffness            | x             |                |     |     |     |     |     |
| CT                         | x             |                |     |     |     |     |     |
| Esophagogastroduodenoscopy | x             | x              |     |     |     |     |     |
| Electrocardiogram          | x             |                |     |     |     |     |     |
| QOL                        |               |                | x   | x   | x   | x   | x   |
| KPS                        |               |                | x   | x   | x   | x   | x   |

Assessments  
Time points of involved assessments to be performed are outlined in Table 1. For participants allocated to either the groups, the following assessments will be performed and corresponding data will be collected:

1. Demographic characteristics including gender, height, weight, date of birth and ethnic.
2. Transjugular measurement of HVPG.
3. Disease history with clear record about the number of occurrence of gastroesophageal variceal bleeding and other complexes including ascites, spontaneous bacterial peritonitis, hepatic encephalopathy, electrolyte imbalance, portal venous thrombosis, hepatorenal syndrome and hepatopulmonary syndrome, etc.
4. Clinical diagnosis and etiology for cirrhosis.
5. Laboratory test results including red blood cells, white blood cells, hemoglobin, blood ammonia, platelet count, prothrombin time, activated partial thromboplastin time, international normalized ratio, total bilirubin, direct and indirect bilirubin, glutamine transferase, alanine aminotransferase, aspartate aminotransferase, albumin and serum

- 1  
2  
3  
4 271 creatinine.
- 5  
6 272 6. Color Doppler ultrasound results including general condition of spleen and liver, spleen  
7  
8 273 diameter, portal vein diameter, portal vein velocity, splenic vein velocity, splenic venous  
9  
10 274 reflux, cardiac output, left ventricular ejection fraction and heart output.
- 11  
12 275 7. Liver stiffness and spleen stiffness assessed by FibroTouch or FibroScan.
- 13  
14 276 8. Abdominal CT scans.
- 15  
16 277 9. Esophagogastroduodenoscopy results including the location, classification, diameter of  
17  
18 278 varices and red signs.
- 19  
20 279 10. Electrocardiogram results.
- 21  
22 280 11. Child-Pugh score and classes.
- 23  
24 281 12. Model for end-stage liver disease (MELD) score.
- 25  
26 282 13. QOL score.
- 27  
28 283 14. KPS score.
- 29  
30 284 15. Adjustment records of dosage of propranolol.
- 31  
32 285 16. Adverse events and severe adverse events of any cause.
- 33  
34 286 17. Length stay.

35 287 Upon occurrence of the first variceal rebleeding after the operative intervention, the  
36  
37 288 following data will be additionally collected:

- 38  
39 289 1. Cause of rebleeding.
- 40  
41 290 2. Time of rebleeding since enrollment.
- 42  
43 291 3. Treatment and outcome of the rebleeding.

44  
45 292 Upon death of a participant, the following data will be additionally collected:

- 46  
47 293 1. Time of death since enrollment.
- 48  
49 294 2. Cause of death.

50  
51 295

### 52 296 **Sample size estimation**

53  
54 297 No study has yet compared the outcome between cirrhotic patients with gastroesophageal  
55  
56 298 variceal bleeding receiving either laparoscopic therapy or endoscopic therapy. Also, because  
57  
58 299 of the lack of study restricting HVPG baseline level and studies about laparoscopic therapy  
59  
60 300 plus propranolol oral administration, the sample size is determined based on pooled data of

variceal rebleeding rate of several studies including endoscopic therapy plus propranolol oral administration or laparoscopic therapy. The variceal rebleeding rate of endoscopic therapy plus propranolol oral administration is estimated by 6 randomized controlled trials (Table 2).<sup>22-27</sup> The variceal rebleeding rate of laparoscopic therapy is estimated by 6 retrospective studies (Table 2).<sup>20 28-32</sup> Pooled rates of variceal rebleeding for endoscopic group and laparoscopic group are 44% and 6%, respectively. Considering a type I error rate ( $\alpha$ ) of 5% and a type II error rate ( $1-\beta$ ) of 20% and a dropout rate of 10%, the calculated sample size for this trial is 40.

**Table 2 Variceal rebleeding rates in cirrhotic patients with portal hypertension bleeding treated by endoscopic therapy plus propranolol or laparoscopic therapy: a review of 12 studies.**

| Laparoscopic therapy |                    |                          | Endoscopic therapy plus propranolol |                    |                          |
|----------------------|--------------------|--------------------------|-------------------------------------|--------------------|--------------------------|
| First author, year   | Number of patients | Number of rebleeding (%) | First author, year                  | Number of patients | Number of rebleeding (%) |
| Zheng, 2018          | 250                | 9 (3.6%)                 | Lv, 2018                            | 25                 | 13 (52%)                 |
| Bai, 2017            | 40                 | 2 (5%)                   | Holster, 2016                       | 35                 | 10 (28.6%)               |
| Bao, 2017            | 76                 | 19 (25%)                 | Luo, 2015                           | 36                 | 21 (58.3%)               |
| Cheng, 2014          | 204                | 7 (3.4%)                 | Hung, 2012                          | 47                 | 22 (46.8%)               |
| Jiang, 2009          | 26                 | 0 (0%)                   | Sauer, 2002                         | 40                 | 12 (30%)                 |
| Wang, 2008           | 22                 | 0 (0%)                   | Rössle, 1997                        | 62                 | 29 (46.8%)               |

### Ethics and dissemination

Ethical approval was obtained from all three participating centers. Any modifications in protocol will be done under the premise of adequate communication and approval. All interventions and assessments included in this trial will be in full compliance with Good Clinical Practice (GCP).

Before the allocation, all participant candidates will be fully informed about the purpose, process and possible consequences of the trial. Before any treatment, the participants will be informed about the interventions they will undergo and the interventions will not be applied before a written informed consent signed by the participants themselves is provided.

The result of this trial (CHESS1803) will be presented at national and international conferences and published in peer-reviewed journals.



322

**Safety**

Laparoscopic therapy is accepted and performed in Asia-pacific countries, while endoscopic therapy is generally implemented worldwide. Both surgical interventions showed low risks of severe adverse events. Nevertheless, the participants and whose relatives will be able to contact the study team when any severe adverse event or disease complication occurs. The participants will receive proper treatments as soon as feasible.

The following data will be recorded when an adverse event occurs:

1. The exact kind of adverse event.
2. The starting, ending and reporting time of the adverse event.
3. Severity of the adverse event.
4. Treatment and outcome of the adverse event.

Adverse events will be documented and reported to the investigators and ethics board of the involved center in 48h. Severe adverse events will be documented and reported to the investigators and ethics board of the involved center, principle investigator and supervision departments required by GCP immediately.

338

**Data management**

For imaging data, the electronic form images will be collected. Other raw data will be recorded in the written form case report form first and saved electronically afterwards. All electronic data will be kept by a member of the study team without direct clinical contact with any of the centers. All written form data will be stored in cabinets with lock permitting access for only investigators. All data will be kept for 25 years after publication and destroyed after then.

346

**Statistical analyses**

Statistical analyses will be performed in intention-to-treat cases. A case will be censored when the participant received liver transplantation. Subgroup analysis will be performed for Child-Pugh class A and class B patients respectively. Continuous variables will be shown as mean ( $\pm$ SE) or median (range). No interim analyses will be conducted on the primary

1  
2  
3  
4 352 outcome. Multivariate COX regression model including age, sex, platelet, HVPG, aspartate  
5  
6 353 aminotransferase, alanine aminotransferase, albumin, total bilirubin, MELD score and Child-  
7  
8 354 Pugh score as confounders will be introduced for analyses of variceal rebleeding and  
9  
10 355 survival, while applying Kaplan-Meier analysis with Log-rank test for inter-group  
11  
12 356 comparison. Occurrence data including variceal rebleeding, overall survival, hepatocellular  
13  
14 357 carcinoma and portal venous thrombosis will be compared using the chi square test. The  
15  
16 358 occurrence of all adverse events will also be collected, described and compared using chi  
17  
18 359 square test overall and specifically. For data with repeated measurements including QOL  
19  
20 360 score, KPS score and laboratory tests results, repeated measures ANOVA will be applied.  
21  
22 361 Student's t test or Wilcoxon rank sum test (for continuous data) and chi square test or  
23  
24 362 Fisher's exact test (for discrete variable) will be applied for analyses of other unmentioned  
25  
26 363 outcomes. All results will be presented with 95% CIs.

## 364 365 **DISCUSSION**

366 To the best of our knowledge, this study is the first to compare the effectiveness and safety of  
367 laparoscopic therapy plus propranolol with endoscopic therapy plus propranolol, the first-line  
368 therapy recommended by international guidelines,<sup>3 5</sup> under an HVPG-guided manner. The  
369 risk stratification performance of HVPG has been receiving more concentration and several  
370 attempts have been made on HVPG-guided therapy.<sup>33 34</sup> By introducing HVPG restriction as  
371 an eligibility criterion, this study targets the population that faces high risk of variceal  
372 rebleeding and death<sup>6 8-11</sup> better, enabling exploration of better management for these patients  
373 as well as extension of clinical performance of HVPG.

374 The first splenectomy and pericardial devascularization was performed by Hassab in 1964<sup>35</sup>  
375 and modified by Qiu Fazu in 1981.<sup>36</sup> Benefitted from the rapid development of laparoscopic  
376 equipment and techniques, surgical procedures for variceal bleeding are becoming  
377 decreasingly invasive and also with much lower occurrence of adverse events.<sup>20 29 37-39</sup> Such  
378 laparoscopic therapy has been accepted as one of the most common used methods for variceal  
379 bleeding in Asia-pacific countries. Pericardial devascularization and splenectomy increase the  
380 blood flow of hepatic artery while lower portal pressure and ameliorate leukopenia and  
381 thrombocytopenia. Thus, laparoscopic therapy is considered an effective method for variceal

1  
2  
3  
4 382 bleeding while benefitting liver function with satisfying performance on long-term survival  
5  
6 383 and general condition of patients. However, it is also reported to be correlated with high  
7  
8 384 occurrence of portal venous thrombosis<sup>40</sup> and exacerbation of portal hypertensive  
9  
10 385 gastropathy.<sup>41</sup> Therefore, a multicenter prospective study about laparoscopic therapy will  
11  
12 386 provide valuable information for the clarification of its influence to the overall outcome.  
13  
14 387 Endoscopic therapy plus non-selective beta blockers is recommended as the first-line therapy  
15  
16 388 and widely served as control groups in many studies.<sup>22-27 42</sup> On the contrary, studies about  
17  
18 389 laparoscopic therapy are mainly single-arm<sup>20 32 43</sup> or compared with variants and other  
19  
20 390 surgeries.<sup>28-31 40 44 45</sup> To the best of our knowledge, there haven't been any trials about  
21  
22 391 laparoscopic therapy using endoscopic therapy plus non-selective beta blockers as controls.  
23  
24 392 Thus, this study will also provide data with better comparability to other commonly used  
25  
26 393 therapies.  
27  
28 394 Still, this study has several limitations. First, this is the first prospective study investigating  
29  
30 395 the HVPg-guided therapeutic effect of laparoscopic therapy plus propranolol and endoscopic  
31  
32 396 therapy plus propranolol. The lack of enough previous studies may lead to deviations in  
33  
34 397 sample size estimation. Second, the major cause of cirrhosis of the target population of this  
35  
36 398 study is hepatitis B virus infection while it is more complex in American and European  
37  
38 399 countries. Differences in etiology may bring problems in applicability. Third, the period of  
39  
40 400 follow-up in this study is set to be about one year, which may not be enough to thoroughly  
41  
42 401 unfold the long-term effect of laparoscopic therapy.

43 402

45 403 **Author affiliations**

- 47 404 1. CHESS Center, The First Hospital of Lanzhou University, Lanzhou, China
- 49 405 2. Department of Hepatology Unit and Infectious Diseases, Nanfang Hospital, Southern Medical  
51 406 University, Guangzhou, China
- 53 407 3. Department of Hepatobiliary Surgery, Xingtai Institute of Cancer Control, Xingtai, China
- 55 408 4. Department of Hepatobiliary Surgery, The Third People's Hospital of Shenzhen, Shenzhen, China
- 57 409 5. Department of General Surgery, The Fifth Medical Center of PLA General Hospital, Beijing, China
- 59 410 6. Department of Hepatobiliary Surgery, Shunde Hospital, Southern Medical University, Foshan, China

60

1  
2  
3  
4 411

5 412 **Contributors** Xiaolong Qi, Weidong Wang, Changzeng Zuo, Zhiwei Li and Xun Li conceived and  
6 413 designed the study. Qingbo Liu, Weijie Zhang, Xiaorong Mao, Xiaojing Song, Jitao Wang, Lei Li and  
7 414 Chuan Liu are responsible of the data collecting and management. Ruoyang Shao and Yanna Liu drafted  
8 415 this manuscript. Ruizhao Qi, Xin Zhao and Xiaolong Qi critically revised the manuscript. The final version  
9 416 of the manuscript was reviewed and approved by all authors.

10  
11  
12  
13  
14  
15 417

16 418 **Funding** This work is funded by the grants from National Natural Science Foundation of China  
17 419 (81600510); Guangdong Science Fund for Distinguished Young Scholars (2018B030306019); Guangzhou  
18 420 Industry-Academia-Research Collaborative Innovation Major Project (201704020015).

19  
20  
21  
22  
23 421

24 422 **Disclaimer** The funders do not participate in the design, recruitment, intervention, data collection, data  
25 423 management and analysis of the study and the preparation and revision of this protocol.

26  
27  
28  
29 424

30 425 **Competing interests** None declared.

31  
32  
33 426

34 427 **Patient consent for publication** Obtained.

35  
36  
37 428

38 429 **Ethics approval** This study has been approved by the ethics committee of Shunde Hospital, Southern  
39 430 Medical University (20190104); Xingtai People's Hospital ([2019]001); The First Hospital of Lanzhou  
40 431 University (LDYYLL2019-179).

41  
42  
43  
44 432

45 433 **Provenance and peer review** Not commissioned; internally peer reviewed.

46  
47  
48  
49 434

50 435 **Data availability statement** All data from this study will be made available upon reasonable request. To  
51 436 request for data, please contact the corresponding author.

52  
53  
54 437

55 438 **Open access** This is an open access article distributed in accordance with the Creative Commons  
56 439 Attribution Non Commercial (CC BY-NC 4.0) license, which permits others to distribute, remix, adapt,  
57 440 build upon this work non-commercially, and license their derivative works on different terms, provided the

1  
2  
3  
4 441 original work is properly cited, appropriate credit is given, any changes made indicated, and the use is non-  
5  
6 442 commercial. See: <http://creativecommons.org/licenses/by-nc/4.0/>.

7  
8 443

## 9 444 **References**

- 11 445 1. Tsochatzis EA, Bosch J, Burroughs AK. Liver cirrhosis. *The Lancet* 2014;383:1749-61.
- 12 446 2. Garcia-Tsao G, Bosch J. Management of varices and variceal hemorrhage in cirrhosis. *The New England*  
13 447 *journal of medicine* 2010;362:823-32.
- 15 448 3. de Franchis R, Baveno VIF. Expanding consensus in portal hypertension: Report of the Baveno VI Consensus  
16 449 Workshop: Stratifying risk and individualizing care for portal hypertension. *Journal of hepatology* 2015;63:743-  
17 450 52.
- 19 451 4. Bosch J, Abraldes JG, Berzigotti A, et al. The clinical use of HVPG measurements in chronic liver disease.  
20 452 *Nature reviews Gastroenterology & hepatology* 2009;6:573-82.
- 21 453 5. Garcia-Tsao G, Abraldes JG, Berzigotti A, et al. Portal hypertensive bleeding in cirrhosis: Risk stratification,  
23 454 diagnosis, and management: 2016 practice guidance by the American Association for the study of liver  
24 455 diseases. *Hepatology* 2017;65:310-35.
- 25 456 6. Li GQ, Yang B, Liu J, et al. Hepatic venous pressure gradient is a useful predictor in guiding treatment on  
26 457 prevention of variceal rebleeding in cirrhosis. *International journal of clinical and experimental medicine*  
28 458 2015;8:19709-16.
- 29 459 7. Qi XS, Fan DM. Hepatic venous pressure gradient measurement before TIPS for acute variceal bleeding.  
30 460 *World journal of gastroenterology* 2014;20:7523-4.
- 32 461 8. Garcia-Tsao G, Groszmann RJ, Fisher RL, et al. Portal pressure, presence of gastroesophageal varices and  
33 462 variceal bleeding. *Hepatology* 1985;5:419-24.
- 34 463 9. Berzigotti A, Rossi V, Tiani C, et al. Prognostic value of a single HVPG measurement and Doppler-ultrasound  
36 464 evaluation in patients with cirrhosis and portal hypertension. *Journal of gastroenterology* 2011;46:687-95.
- 37 465 10. Silva-Junior G, Baiges A, Turon F, et al. The prognostic value of hepatic venous pressure gradient in patients  
38 466 with cirrhosis is highly dependent on the accuracy of the technique. *Hepatology* 2015;62:1584-92.
- 40 467 11. Merkel C, Bolognesi M, Bellon S, et al. Prognostic usefulness of hepatic vein catheterization in patients with  
41 468 cirrhosis and esophageal varices. *Gastroenterology* 1992;102:973-9.
- 42 469 12. Moitinho E, Escorsell A, Bandi JC, et al. Prognostic value of early measurements of portal pressure in acute  
43 470 variceal bleeding. *Gastroenterology* 1999;117:626-31.
- 45 471 13. Monescillo A, Martinez-Lagares F, Ruiz-del-Arbol L, et al. Influence of portal hypertension and its early  
46 472 decompression by TIPS placement on the outcome of variceal bleeding. *Hepatology* 2004;40:793-801.
- 47 473 14. Garcia-Pagan JC, Caca K, Bureau C, et al. Early use of TIPS in patients with cirrhosis and variceal bleeding.  
48 474 *The New England journal of medicine* 2010;362:2370-9.
- 50 475 15. Zhang M, Wang G, Zhao L, et al. Second prophylaxis of variceal bleeding in cirrhotic patients with a high  
51 476 HVPG. *Scandinavian journal of gastroenterology* 2016;51:1502-06.
- 53 477 16. Hassab MA. Gastroesophageal decongestion and splenectomy in the treatment of esophageal varices in  
54 478 bilharzial cirrhosis: further studies with a report on 355 operations. *Surgery* 1967;61:169-76.
- 55 479 17. Hassab MA, Younis MT, el-Kilany MS. Gastroesophageal decongestion and splenectomy in the treatment of  
56 480 esophageal varices secondary to bilharzial cirrhosis: anatomical and experimental studies. *Surgery*  
57 481 1968;63:731-7.
- 59 482 18. Delaitre B, Maignien B. [Splenectomy by the laparoscopic approach. Report of a case]. *Presse medicale*

- 1  
2  
3 483 (Paris, France : 1983) 1991;20:2263.
- 4 484 19. Wang Y, Zhan X, Zhu Y, et al. Laparoscopic splenectomy in portal hypertension: a single-surgeon 13-year  
5 485 experience. *Surgical endoscopy* 2010;24:1164-9.
- 6 486 20. Cheng Z, Li JW, Chen J, et al. Therapeutic effects of laparoscopic splenectomy and esophagogastric  
7 487 devascularization on liver cirrhosis and portal hypertension in 204 cases. *Journal of laparoendoscopic &*  
8 488 *advanced surgical techniques Part A* 2014;24:612-6.
- 9 489 21. Sun Y, Lan X, Shao C, et al. Clinical features of idiopathic portal hypertension in China: A retrospective study  
10 490 of 338 patients and literature review. *Journal of gastroenterology and hepatology* 2018.
- 11 491 22. Lv Y, Qi X, He C, et al. Covered TIPS versus endoscopic band ligation plus propranolol for the prevention of  
12 492 variceal rebleeding in cirrhotic patients with portal vein thrombosis: a randomized controlled trial. *Gut*  
13 493 2018;67:2156-68.
- 14 494 23. Holster IL, Tjwa ET, Moelker A, et al. Covered transjugular intrahepatic portosystemic shunt versus  
15 495 endoscopic therapy + beta-blocker for prevention of variceal rebleeding. *Hepatology* 2016;63:581-9.
- 16 496 24. Luo X, Wang Z, Tsao J, et al. Advanced Cirrhosis Combined with Portal Vein Thrombosis: A Randomized  
17 497 Trial of TIPS versus Endoscopic Band Ligation Plus Propranolol for the Prevention of Recurrent Esophageal  
18 498 Variceal Bleeding. *Radiology* 2015;276:286-93.
- 19 499 25. Hung HH, Chang CJ, Hou MC, et al. Efficacy of non-selective beta-blockers as adjunct to endoscopic  
20 500 prophylactic treatment for gastric variceal bleeding: a randomized controlled trial. *Journal of hepatology*  
21 501 2012;56:1025-32.
- 22 502 26. Sauer P, Hansmann J, Richter GM, et al. Endoscopic variceal ligation plus propranolol vs. transjugular  
23 503 intrahepatic portosystemic stent shunt: a long-term randomized trial. *Endoscopy* 2002;34:690-7.
- 24 504 27. Rössle M, Deibert P, Haag K, et al. Randomized trial of transjugular-intrahepatic-portosystemic shunt  
25 505 versus endoscopy plus propranolol for prevention of variceal rebleeding. *The Lancet* 1997;349:1043-49.
- 26 506 28. Bai D-S, Chen P, Jin S-J, et al. Vagus nerve-preserving versus conventional laparoscopic splenectomy and  
27 507 azygoportal disconnection. *Surgical endoscopy* 2017;32:2696-703.
- 28 508 29. Zheng S, Sun P, Liu X, et al. Efficacy and safety of laparoscopic splenectomy and esophagogastric  
29 509 devascularization for portal hypertension: A single-center experience. *Medicine* 2018;97:e13703.
- 30 510 30. Bao H, He Q, Dai N, et al. Retrospective Study to Compare Selective Decongestive Devascularization and  
31 511 Gastrosplenic Shunt versus Splenectomy with Pericardial Devascularization for the Treatment of Patients with  
32 512 Esophagogastric Varices Due to Cirrhotic Portal Hypertension. *Medical Science Monitor* 2017;23:2788-95.
- 33 513 31. Jiang X-Z, Zhao S-Y, Luo H, et al. Laparoscopic and open splenectomy and azygoportal disconnection for  
34 514 portal hypertension. *World journal of gastroenterology* 2009;15:3421.
- 35 515 32. Wang YD, Ye H, Ye ZY, et al. Laparoscopic Splenectomy and Azygoportal Disconnection for Bleeding Varices  
36 516 with Hypersplenism. *Journal of Laparoendoscopic & Advanced Surgical Techniques* 2008;18:37-41.
- 37 517 33. Villanueva C, Graupera I, Aracil C, et al. A randomized trial to assess whether portal pressure guided  
38 518 therapy to prevent variceal rebleeding improves survival in cirrhosis. *Hepatology* 2017;65:1693-707.
- 39 519 34. Villanueva C, Aracil C, Colomo A, et al. Clinical trial: a randomized controlled study on prevention of  
40 520 variceal rebleeding comparing nadolol + ligation vs. hepatic venous pressure gradient-guided pharmacological  
41 521 therapy. *Alimentary pharmacology & therapeutics* 2009;29:397-408.
- 42 522 35. Hassab MA. GASTROESOPHAGEAL DECONGESTION AND SPLENECTOMY. A METHOD OF PREVENTION AND  
43 523 TREATMENT OF BLEEDING FROM ESOPHAGEAL VARICES ASSOCIATED WITH BILHARZIAL HEPATIC FIBROSIS:  
44 524 PRELIMINARY REPORT. *The Journal of the International College of Surgeons* 1964;41:232-48.
- 45 525 36. Qiu FZ. Evaluation of the pericardial devascularization in portal hypertension. *Zhonghua wai ke za zhi*  
46 526 *[Chinese journal of surgery]* 1983;21:275-7.

- 1  
2  
3 527 37. Zhan XL, Ji Y, Wang YD. Laparoscopic splenectomy for hypersplenism secondary to liver cirrhosis and portal  
4 528 hypertension. *World journal of gastroenterology* 2014;20:5794-800.
- 5 529 38. Yu H, Guo S, Wang L, et al. Laparoscopic Splenectomy and Esophagogastric Devascularization for Liver  
6 530 Cirrhosis and Portal Hypertension Is a Safe, Effective, and Minimally Invasive Operation. *Journal of*  
7 531 *laparoendoscopic & advanced surgical techniques Part A* 2016;26:524-30.
- 8 532 39. Liu Y, Li Y, Ma J, et al. A modified Hassab's operation for portal hypertension: experience with 562 cases.  
9 533 *The Journal of surgical research* 2013;185:463-8.
- 10 534 40. Sun L, Zhou H, Gu L, et al. Effects of surgical procedures on the occurrence and development of  
11 535 postoperative portal vein thrombosis in patients with cirrhosis complicated by portal hypertension.  
12 536 *International journal of surgery* 2015;16:31-35.
- 13 537 41. Huang Y, Wang W, Wang J, et al. Surgical treatment of portal hypertension: 45 year experience. *Zhonghua*  
14 538 *wai ke za zhi [Chinese journal of surgery]* 2000;38:85-8.
- 15 539 42. Sarin SK, Wadhawan M, Agarwal SR, et al. Endoscopic variceal ligation plus propranolol versus endoscopic  
16 540 variceal ligation alone in primary prophylaxis of variceal bleeding. *The American journal of gastroenterology*  
17 541 2005;100:797-804.
- 18 542 43. Wu SD, Fan Y, Kong J, et al. Transumbilical single-incision laparoscopic splenectomy plus pericardial  
19 543 devascularization using conventional instruments: initial experience of 5 cases. *Journal of laparoendoscopic &*  
20 544 *advanced surgical techniques Part A* 2013;23:150-3.
- 21 545 44. Ando K, Kurokawa T, Nagata H, et al. Laparoscopic surgery in the management of hypersplenism and  
22 546 esophagogastric varices: our initial experiences. *Surgical innovation* 2012;19:421-7.
- 23 547 45. Chen H, Yang F, Li TT, et al. Comparison of Efficacy of Laparoscopic and Open Splenectomy Combined With  
24 548 Selective and Nonselective Pericardial Devascularization in Portal Hypertension Patients. *Surgical laparoscopy,*  
25 549 *endoscopy & percutaneous techniques* 2018;28:401-03.

33  
34 550

35  
36 551 **Figure 1** Flow chart for study design.

37  
38 552  
39  
40  
41  
42  
43  
44  
45  
46  
47  
48  
49  
50  
51  
52  
53  
54  
55  
56  
57  
58  
59  
60

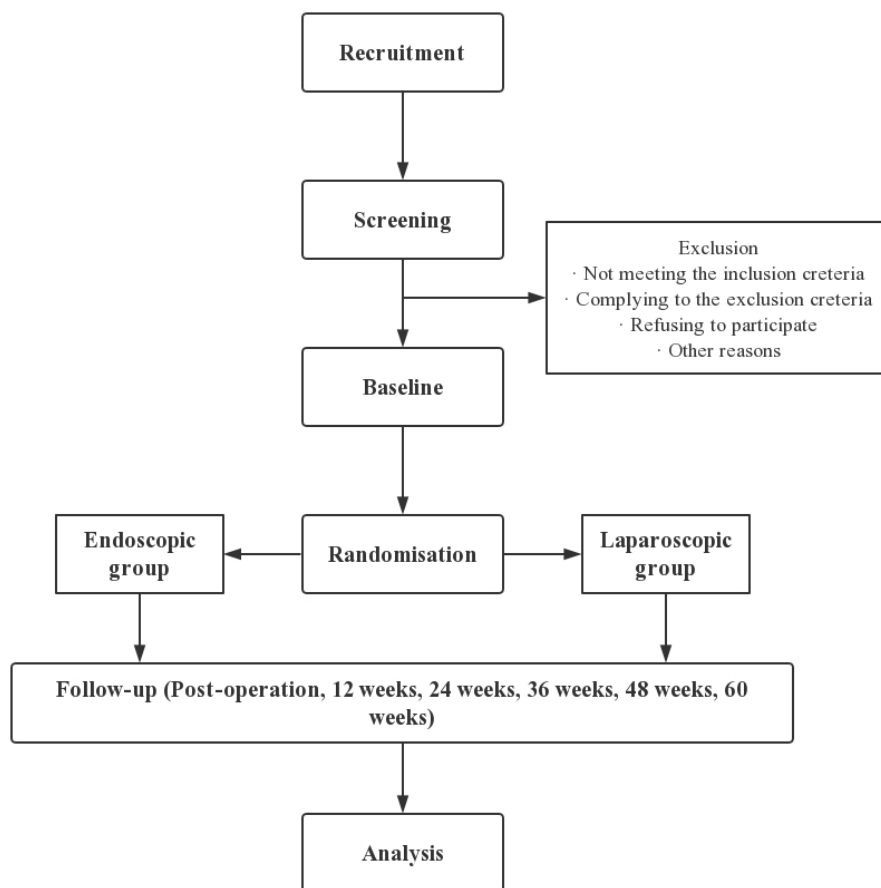

Flow chart for study design.





STANDARD PROTOCOL ITEMS: RECOMMENDATIONS FOR INTERVENTIONAL TRIALS

SPIRIT 2013 Checklist: Recommended items to address in a clinical trial protocol and related documents\*

| Section/item                                                  | Item No | Description                                                                                                                                                                                                                                                                              |
|---------------------------------------------------------------|---------|------------------------------------------------------------------------------------------------------------------------------------------------------------------------------------------------------------------------------------------------------------------------------------------|
| <b>Administrative information</b>                             |         |                                                                                                                                                                                                                                                                                          |
| Title (P 1/line 3)                                            | 1       | Descriptive title identifying the study design, population, interventions, and, if applicable, trial acronym                                                                                                                                                                             |
| Trial registration (P 3/line 65)                              | 2a      | Trial identifier and registry name. If not yet registered, name of intended registry                                                                                                                                                                                                     |
|                                                               | 2b      | All items from the World Health Organization Trial Registration Data Set                                                                                                                                                                                                                 |
| Protocol version                                              | 3       | Date and version identifier                                                                                                                                                                                                                                                              |
| Funding (P 15/line 386)                                       | 4       | Sources and types of financial, material, and other support                                                                                                                                                                                                                              |
| Roles and responsibilities (P 14/line 369)<br>(P 15/line 390) | 5a      | Names, affiliations, and roles of protocol contributors                                                                                                                                                                                                                                  |
|                                                               | 5b      | Name and contact information for the trial sponsor                                                                                                                                                                                                                                       |
|                                                               | 5c      | Role of study sponsor and funders, if any, in study design; collection, management, analysis, and interpretation of data; writing of the report; and the decision to submit the report for publication, including whether they will have ultimate authority over any of these activities |
|                                                               | 5d      | Composition, roles, and responsibilities of the coordinating centre, steering committee, endpoint adjudication committee, data management team, and other individuals or groups overseeing the trial, if applicable (see Item 21a for data monitoring committee)                         |
| <b>Introduction</b>                                           |         |                                                                                                                                                                                                                                                                                          |
| Background and rationale (P 4/line 84)                        | 6a      | Description of research question and justification for undertaking the trial, including summary of relevant studies (published and unpublished) examining benefits and harms for each intervention                                                                                       |
|                                                               | 6b      | Explanation for choice of comparators                                                                                                                                                                                                                                                    |
| Objectives (P 5/line 123)                                     | 7       | Specific objectives or hypotheses                                                                                                                                                                                                                                                        |

1  
2  
3  
4  
5  
6  
7  
8  
9  
10  
11  
12  
13  
14  
15  
16  
17  
18  
19  
20  
21  
22  
23  
24  
25  
26  
27  
28  
29  
30  
31  
32  
33  
34  
35  
36  
37  
38  
39  
40  
41  
42  
43  
44  
45  
46  
47  
48  
49  
50  
51  
52  
53  
54  
55  
56  
57  
58  
59  
60

|                             |   |                                                                                                                                                                                                           |
|-----------------------------|---|-----------------------------------------------------------------------------------------------------------------------------------------------------------------------------------------------------------|
| Trial design (P 6/line 139) | 8 | Description of trial design including type of trial (eg, parallel group, crossover, factorial, single group), allocation ratio, and framework (eg, superiority, equivalence, noninferiority, exploratory) |
|-----------------------------|---|-----------------------------------------------------------------------------------------------------------------------------------------------------------------------------------------------------------|

### Methods: Participants, interventions, and outcomes

|                              |   |                                                                                                                                                                                    |
|------------------------------|---|------------------------------------------------------------------------------------------------------------------------------------------------------------------------------------|
| Study setting (P 6/line 139) | 9 | Description of study settings (eg, community clinic, academic hospital) and list of countries where data will be collected. Reference to where list of study sites can be obtained |
|------------------------------|---|------------------------------------------------------------------------------------------------------------------------------------------------------------------------------------|

|                                     |    |                                                                                                                                                                                              |
|-------------------------------------|----|----------------------------------------------------------------------------------------------------------------------------------------------------------------------------------------------|
| Eligibility criteria (P 6/line 147) | 10 | Inclusion and exclusion criteria for participants. If applicable, eligibility criteria for study centres and individuals who will perform the interventions (eg, surgeons, psychotherapists) |
|-------------------------------------|----|----------------------------------------------------------------------------------------------------------------------------------------------------------------------------------------------|

|                              |     |                                                                                                                            |
|------------------------------|-----|----------------------------------------------------------------------------------------------------------------------------|
| Interventions (P 7/line 184) | 11a | Interventions for each group with sufficient detail to allow replication, including how and when they will be administered |
|------------------------------|-----|----------------------------------------------------------------------------------------------------------------------------|

|  |     |                                                                                                                                                                                                |
|--|-----|------------------------------------------------------------------------------------------------------------------------------------------------------------------------------------------------|
|  | 11b | Criteria for discontinuing or modifying allocated interventions for a given trial participant (eg, drug dose change in response to harms, participant request, or improving/worsening disease) |
|--|-----|------------------------------------------------------------------------------------------------------------------------------------------------------------------------------------------------|

|  |     |                                                                                                                                                   |
|--|-----|---------------------------------------------------------------------------------------------------------------------------------------------------|
|  | 11c | Strategies to improve adherence to intervention protocols, and any procedures for monitoring adherence (eg, drug tablet return, laboratory tests) |
|--|-----|---------------------------------------------------------------------------------------------------------------------------------------------------|

|  |     |                                                                                               |
|--|-----|-----------------------------------------------------------------------------------------------|
|  | 11d | Relevant concomitant care and interventions that are permitted or prohibited during the trial |
|--|-----|-----------------------------------------------------------------------------------------------|

|                         |    |                                                                                                                                                                                                                                                                                                                                                                                |
|-------------------------|----|--------------------------------------------------------------------------------------------------------------------------------------------------------------------------------------------------------------------------------------------------------------------------------------------------------------------------------------------------------------------------------|
| Outcomes (P 8/line 213) | 12 | Primary, secondary, and other outcomes, including the specific measurement variable (eg, systolic blood pressure), analysis metric (eg, change from baseline, final value, time to event), method of aggregation (eg, median, proportion), and time point for each outcome. Explanation of the clinical relevance of chosen efficacy and harm outcomes is strongly recommended |
|-------------------------|----|--------------------------------------------------------------------------------------------------------------------------------------------------------------------------------------------------------------------------------------------------------------------------------------------------------------------------------------------------------------------------------|

|                                     |    |                                                                                                                                                                                  |
|-------------------------------------|----|----------------------------------------------------------------------------------------------------------------------------------------------------------------------------------|
| Participant timeline (P 9/line 228) | 13 | Time schedule of enrolment, interventions (including any run-ins and washouts), assessments, and visits for participants. A schematic diagram is highly recommended (see Figure) |
|-------------------------------------|----|----------------------------------------------------------------------------------------------------------------------------------------------------------------------------------|

|                             |    |                                                                                                                                                                                       |
|-----------------------------|----|---------------------------------------------------------------------------------------------------------------------------------------------------------------------------------------|
| Sample size (P 11/line 267) | 14 | Estimated number of participants needed to achieve study objectives and how it was determined, including clinical and statistical assumptions supporting any sample size calculations |
|-----------------------------|----|---------------------------------------------------------------------------------------------------------------------------------------------------------------------------------------|

|                            |    |                                                                                     |
|----------------------------|----|-------------------------------------------------------------------------------------|
| Recruitment (P 7/line 167) | 15 | Strategies for achieving adequate participant enrolment to reach target sample size |
|----------------------------|----|-------------------------------------------------------------------------------------|

### Methods: Assignment of interventions (for controlled trials)

|                            |  |  |
|----------------------------|--|--|
| Allocation: (P 7/line 176) |  |  |
|----------------------------|--|--|

|    |                |     |                                                                         |
|----|----------------|-----|-------------------------------------------------------------------------|
| 1  |                |     |                                                                         |
| 2  | Sequence       | 16a | Method of generating the allocation sequence (eg, computer-             |
| 3  | generation     |     | generated random numbers), and list of any factors for stratification.  |
| 4  |                |     | To reduce predictability of a random sequence, details of any planned   |
| 5  |                |     | restriction (eg, blocking) should be provided in a separate document    |
| 6  |                |     | that is unavailable to those who enrol participants or assign           |
| 7  |                |     | interventions                                                           |
| 8  |                |     |                                                                         |
| 9  |                |     |                                                                         |
| 10 | Allocation     | 16b | Mechanism of implementing the allocation sequence (eg, central          |
| 11 | concealment    |     | telephone; sequentially numbered, opaque, sealed envelopes),            |
| 12 | mechanism      |     | describing any steps to conceal the sequence until interventions are    |
| 13 |                |     | assigned                                                                |
| 14 |                |     |                                                                         |
| 15 | Implementation | 16c | Who will generate the allocation sequence, who will enrol participants, |
| 16 |                |     | and who will assign participants to interventions                       |
| 17 |                |     |                                                                         |
| 18 | Blinding       | 17a | Who will be blinded after assignment to interventions (eg, trial        |
| 19 | (masking)      |     | participants, care providers, outcome assessors, data analysts), and    |
| 20 |                |     | how                                                                     |
| 21 |                |     |                                                                         |
| 22 |                |     |                                                                         |
| 23 |                | 17b | If blinded, circumstances under which unblinding is permissible, and    |
| 24 |                |     | procedure for revealing a participant's allocated intervention during   |
| 25 |                |     | the trial                                                               |
| 26 |                |     |                                                                         |
| 27 |                |     |                                                                         |

### Methods: Data collection, management, and analysis

|    |                   |     |                                                                          |
|----|-------------------|-----|--------------------------------------------------------------------------|
| 28 |                   |     |                                                                          |
| 29 |                   |     |                                                                          |
| 30 | Data collection   | 18a | Plans for assessment and collection of outcome, baseline, and other      |
| 31 | methods (P 9/line |     | trial data, including any related processes to promote data quality (eg, |
| 32 | 230)              |     | duplicate measurements, training of assessors) and a description of      |
| 33 |                   |     | study instruments (eg, questionnaires, laboratory tests) along with      |
| 34 |                   |     | their reliability and validity, if known. Reference to where data        |
| 35 |                   |     | collection forms can be found, if not in the protocol                    |
| 36 |                   |     |                                                                          |
| 37 |                   |     |                                                                          |
| 38 |                   | 18b | Plans to promote participant retention and complete follow-up,           |
| 39 |                   |     | including list of any outcome data to be collected for participants who  |
| 40 |                   |     | discontinue or deviate from intervention protocols                       |
| 41 |                   |     |                                                                          |
| 42 | Data              | 19  | Plans for data entry, coding, security, and storage, including any       |
| 43 | management (P     |     | related processes to promote data quality (eg, double data entry;        |
| 44 | 12/ line 310)     |     | range checks for data values). Reference to where details of data        |
| 45 |                   |     | management procedures can be found, if not in the protocol               |
| 46 |                   |     |                                                                          |
| 47 |                   |     |                                                                          |
| 48 | Statistical       | 20a | Statistical methods for analysing primary and secondary outcomes.        |
| 49 | methods (P        |     | Reference to where other details of the statistical analysis plan can be |
| 50 | 13/line 318)      |     | found, if not in the protocol                                            |
| 51 |                   |     |                                                                          |
| 52 |                   |     |                                                                          |
| 53 |                   | 20b | Methods for any additional analyses (eg, subgroup and adjusted           |
| 54 |                   |     | analyses)                                                                |
| 55 |                   |     |                                                                          |
| 56 |                   | 20c | Definition of analysis population relating to protocol non-adherence     |
| 57 |                   |     | (eg, as randomised analysis), and any statistical methods to handle      |
| 58 |                   |     | missing data (eg, multiple imputation)                                   |
| 59 |                   |     |                                                                          |
| 60 |                   |     |                                                                          |



|                                                                   |                                            |     |                                                                                                                                                                                                                                                                                     |
|-------------------------------------------------------------------|--------------------------------------------|-----|-------------------------------------------------------------------------------------------------------------------------------------------------------------------------------------------------------------------------------------------------------------------------------------|
| 1<br>2<br>3<br>4<br>5<br>6<br>7<br>8<br>9<br>10<br>11<br>12<br>13 | Dissemination<br>policy (P 11/line<br>281) | 31a | Plans for investigators and sponsor to communicate trial results to participants, healthcare professionals, the public, and other relevant groups (eg, via publication, reporting in results databases, or other data sharing arrangements), including any publication restrictions |
|                                                                   |                                            | 31b | Authorship eligibility guidelines and any intended use of professional writers                                                                                                                                                                                                      |
|                                                                   |                                            | 31c | Plans, if any, for granting public access to the full protocol, participant-level dataset, and statistical code                                                                                                                                                                     |

## Appendices

|                                                                      |                                                          |    |                                                                                                                                                                                                |
|----------------------------------------------------------------------|----------------------------------------------------------|----|------------------------------------------------------------------------------------------------------------------------------------------------------------------------------------------------|
| 14<br>15<br>16<br>17<br>18<br>19<br>20<br>21<br>22<br>23<br>24<br>25 | Informed consent<br>materials<br>(supplementary<br>file) | 32 | Model consent form and other related documentation given to participants and authorised surrogates                                                                                             |
| 22<br>23<br>24<br>25                                                 | Biological<br>specimens                                  | 33 | Plans for collection, laboratory evaluation, and storage of biological specimens for genetic or molecular analysis in the current trial and for future use in ancillary studies, if applicable |

---

\*It is strongly recommended that this checklist be read in conjunction with the SPIRIT 2013 Explanation & Elaboration for important clarification on the items. Amendments to the protocol should be tracked and dated. The SPIRIT checklist is copyrighted by the SPIRIT Group under the Creative Commons "[Attribution-NonCommercial-NoDerivs 3.0 Unported](https://creativecommons.org/licenses/by-nc-nd/3.0/)" license.

# BMJ Open

## Hepatic venous pressure gradient-guided laparoscopic splenectomy and pericardial devascularization versus endoscopic therapy for secondary prophylaxis for variceal rebleeding in portal hypertension (CHESS1803): Study protocol of a multicenter randomized controlled trial in China

|                                 |                                                                                                                                                                                                                                                                                                                                                                                                                                                                                                                                                                                                                                                                                                                                                                                                                                                                                                                                                                                                                                                                                                                                                                                                                                                                                                                                                                                                                                                                                                                                                                                                                                                                             |
|---------------------------------|-----------------------------------------------------------------------------------------------------------------------------------------------------------------------------------------------------------------------------------------------------------------------------------------------------------------------------------------------------------------------------------------------------------------------------------------------------------------------------------------------------------------------------------------------------------------------------------------------------------------------------------------------------------------------------------------------------------------------------------------------------------------------------------------------------------------------------------------------------------------------------------------------------------------------------------------------------------------------------------------------------------------------------------------------------------------------------------------------------------------------------------------------------------------------------------------------------------------------------------------------------------------------------------------------------------------------------------------------------------------------------------------------------------------------------------------------------------------------------------------------------------------------------------------------------------------------------------------------------------------------------------------------------------------------------|
| Journal:                        | <i>BMJ Open</i>                                                                                                                                                                                                                                                                                                                                                                                                                                                                                                                                                                                                                                                                                                                                                                                                                                                                                                                                                                                                                                                                                                                                                                                                                                                                                                                                                                                                                                                                                                                                                                                                                                                             |
| Manuscript ID                   | bmjopen-2019-030960.R2                                                                                                                                                                                                                                                                                                                                                                                                                                                                                                                                                                                                                                                                                                                                                                                                                                                                                                                                                                                                                                                                                                                                                                                                                                                                                                                                                                                                                                                                                                                                                                                                                                                      |
| Article Type:                   | Protocol                                                                                                                                                                                                                                                                                                                                                                                                                                                                                                                                                                                                                                                                                                                                                                                                                                                                                                                                                                                                                                                                                                                                                                                                                                                                                                                                                                                                                                                                                                                                                                                                                                                                    |
| Date Submitted by the Author:   | 15-Feb-2020                                                                                                                                                                                                                                                                                                                                                                                                                                                                                                                                                                                                                                                                                                                                                                                                                                                                                                                                                                                                                                                                                                                                                                                                                                                                                                                                                                                                                                                                                                                                                                                                                                                                 |
| Complete List of Authors:       | <p>Shao, Ruoyang; Southern Medical University Nanfang Hospital, Department of Hematology</p> <p>Li, Zhiwei; Department of Hepatobiliary Surgery, Xingtai Institute of Cancer Control</p> <p>Wang , Jitao; Xingtai People's Hospital, Xingtai, China, Department of Hepatobiliary Surgery</p> <p>Qi, Ruizhao; Department of General Surgery, The Fifth Medical Center of PLA General Hospital</p> <p>Liu, Qingbo; CHESS, Department of Hepatobiliary Surgery, Shunde Hospital, Southern Medical University</p> <p>Zhang, Weijie; CHESS, Department of Hepatobiliary Surgery, Shunde Hospital, Southern Medical University</p> <p>Mao, Xiaorong; CHESS Frontier Center Working Party, The First Hospital of Lanzhou University, Lanzhou University</p> <p>Song, Xiaojing; CHESS Frontier Center Working Party, The First Hospital of Lanzhou University, Lanzhou University</p> <p>Li, Lei; CHESS Frontier Center Working Party, The First Hospital of Lanzhou University, Lanzhou University</p> <p>Liu, Yanna; Southern Medical University Nanfang Hospital, Department of Hepatology Unit and Infectious Diseases</p> <p>Zhao, Xin; Department of Hepatobiliary Surgery, The Third People's Hospital of Shenzhen</p> <p>Liu, Chuan; Nanfang Hospital, Southern Medical University, Department of General Surgery</p> <p>Li, Xun; The First Hospital of LanZhou University</p> <p>Zuo, Changzeng; Department of Hepatobiliary Surgery, Xingtai Institute of Cancer Control</p> <p>Wang, Weidong; Shunde Hospital, Southern Medical University, Department of Hepatobiliary Surgery</p> <p>Qi, Xiaolong; The First Hospital of Lanzhou University, CHESS Frontier Center</p> |
| <b>Primary Subject Heading</b>: | Gastroenterology and hepatology                                                                                                                                                                                                                                                                                                                                                                                                                                                                                                                                                                                                                                                                                                                                                                                                                                                                                                                                                                                                                                                                                                                                                                                                                                                                                                                                                                                                                                                                                                                                                                                                                                             |
| Secondary Subject Heading:      | Gastroenterology and hepatology, Surgery, Research methods                                                                                                                                                                                                                                                                                                                                                                                                                                                                                                                                                                                                                                                                                                                                                                                                                                                                                                                                                                                                                                                                                                                                                                                                                                                                                                                                                                                                                                                                                                                                                                                                                  |

1  
2  
3  
4  
5  
6  
7  
8  
9  
10  
11  
12  
13  
14  
15  
16  
17  
18  
19  
20  
21  
22  
23  
24  
25  
26  
27  
28  
29  
30  
31  
32  
33  
34  
35  
36  
37  
38  
39  
40  
41  
42  
43  
44  
45  
46  
47  
48  
49  
50  
51  
52  
53  
54  
55  
56  
57  
58  
59  
60

|           |                                                                                                                                         |
|-----------|-----------------------------------------------------------------------------------------------------------------------------------------|
| Keywords: | Hepatology < INTERNAL MEDICINE, Hepatobiliary surgery < SURGERY, Endoscopy < GASTROENTEROLOGY, Hepatobiliary disease < GASTROENTEROLOGY |
|           |                                                                                                                                         |

SCHOLARONE™  
Manuscripts



I, the Submitting Author has the right to grant and does grant on behalf of all authors of the Work (as defined in the below author licence), an exclusive licence and/or a non-exclusive licence for contributions from authors who are: i) UK Crown employees; ii) where BMJ has agreed a CC-BY licence shall apply, and/or iii) in accordance with the terms applicable for US Federal Government officers or employees acting as part of their official duties; on a worldwide, perpetual, irrevocable, royalty-free basis to BMJ Publishing Group Ltd ("BMJ") its licensees and where the relevant Journal is co-owned by BMJ to the co-owners of the Journal, to publish the Work in this journal and any other BMJ products and to exploit all rights, as set out in our [licence](#).

The Submitting Author accepts and understands that any supply made under these terms is made by BMJ to the Submitting Author unless you are acting as an employee on behalf of your employer or a postgraduate student of an affiliated institution which is paying any applicable article publishing charge ("APC") for Open Access articles. Where the Submitting Author wishes to make the Work available on an Open Access basis (and intends to pay the relevant APC), the terms of reuse of such Open Access shall be governed by a Creative Commons licence – details of these licences and which [Creative Commons](#) licence will apply to this Work are set out in our licence referred to above.

Other than as permitted in any relevant BMJ Author's Self Archiving Policies, I confirm this Work has not been accepted for publication elsewhere, is not being considered for publication elsewhere and does not duplicate material already published. I confirm all authors consent to publication of this Work and authorise the granting of this licence.



1  
2  
3  
4 **TITLE PAGE**

5  
6 **Title:**

7 Hepatic venous pressure gradient-guided laparoscopic splenectomy and pericardial  
8 devascularization versus endoscopic therapy for secondary prophylaxis for variceal rebleeding  
9 in portal hypertension (CHESS1803): Study protocol of a multicenter randomized controlled  
10 trial in China  
11  
12  
13  
14

15  
16  
17 **Authors and Affiliations:**

18 Ruoyang Shao<sup>1,2\*</sup>, Zhiwei Li<sup>3\*</sup>, Jitao Wang<sup>4\*</sup>, Ruizhao Qi<sup>5</sup>, Qingbo Liu<sup>6</sup>, Weijie Zhang<sup>6</sup>,  
19 Xiaorong Mao<sup>1</sup>, Xiaojing Song<sup>1</sup>, Lei Li<sup>1</sup>, Yanna Liu<sup>1</sup>, Xin Zhao<sup>3</sup>, Chuan Liu<sup>1</sup>, Xun Li<sup>1</sup>,  
20 Changzeng Zuo<sup>4</sup>, Weidong Wang<sup>6</sup>, Xiaolong Qi<sup>1</sup>

21  
22  
23  
24  
25 1. CHESS Center, Institute of Portal Hypertension, The First Hospital of Lanzhou  
26 University, Lanzhou, China

27  
28  
29 2. Department of Hematology, Nanfang Hospital, Southern Medical University,  
30 Guangzhou, China

31  
32  
33 3. Department of Hepatobiliary Surgery, The Third People's Hospital of Shenzhen,  
34 Shenzhen, China

35  
36  
37 4. Department of Hepatobiliary Surgery, Xingtai Institute of Cancer Control, Xingtai,  
38 China

39  
40  
41 5. Department of General Surgery, The Fifth Medical Center of PLA General Hospital,  
42 Beijing, China

43  
44  
45 6. Department of Hepatobiliary Surgery, Shunde Hospital, Southern Medical University,  
46 Foshan, China

47  
48 \* These authors contributed equally to this work.  
49  
50

51  
52 **Corresponding to:**

53 Xiaolong Qi, MD

54 Chair, CHESS (Chinese Portal Hypertension Diagnosis and Monitoring Study Group)

55 Chief, CHESS Center, Institute of Portal Hypertension, The First Hospital of Lanzhou

56  
57  
58  
59  
60 University, Lanzhou, China

1  
2  
3  
4 31 E-mail: qixiaolong@vip.163.com

5  
6 32 OR

7  
8 33 Weidong Wang, MD

9  
10 34 Chief, Department of Hepatobiliary Surgery, Shunde Hospital, Southern Medical University,

11  
12 35 Foshan, China

13  
14 36 E-mail: weiweih@126.com

15  
16 37

17  
18 38 **Keywords:**

19  
20 39 Hepatic venous pressure gradient, variceal rebleeding, randomized controlled trial

21  
22 40

23  
24 41 **Word count:**

25  
26 42 3205 words

**43 ABSTRACT****44 Introduction**

45 Gastroesophageal variceal bleeding is one of the most common and severe complications  
46 with high mortality in cirrhotic patients who developed portal hypertension. Hepatic venous  
47 pressure gradient (HVPG) is a globally recommended golden standard for portal pressure  
48 assessment and an HVPG  $\geq 16$ mmHg indicates a higher risk of death and rebleeding. This  
49 study aims to compare the effectiveness and safety of splenectomy and pericardial  
50 devascularization (laparoscopic therapy) plus propranolol and endoscopic therapy plus  
51 propranolol for variceal rebleeding in cirrhotic patients with HVPG between 16 and 20  
52 mmHg.

**54 Methods and analysis**

55 This is a multicenter, randomized, controlled, clinical trial. Participants will be 1:1 assigned  
56 randomly into either laparoscopic or endoscopic groups. 40 participants whose transjugular  
57 HVPG lies between 16 and 20 mmHg with a history of gastroesophageal variceal bleeding  
58 will be recruited from three sites in China. Participants will receive either endoscopic therapy  
59 plus propranolol or laparoscopic therapy plus propranolol. The primary outcome measure will  
60 be occurrence of gastroesophageal variceal rebleeding. Secondary outcome measures will  
61 include: overall survival, occurrence of hepatocellular carcinoma, occurrence of venous  
62 thrombosis, occurrence of adverse events, quality of life and tolerability of treatment.  
63 Outcome measures will be evaluated at baseline, 12 weeks, 24 weeks, 36 weeks, 48 weeks  
64 and 60 weeks. Multivariate COX regression model will be introduced for analyses of  
65 occurrence data and Kaplan-Meier analysis with Log-rank test for inter-group comparison.

**67 Ethics and dissemination**

68 Ethical approval was obtained from all three participating sites. Primary and secondary  
69 outcome data will be submitted for publication in peer-reviewed journals and widely  
70 disseminated.

**72 Trial registration number**

1  
2  
3  
4 73 NCT03783065; Pre-results.

5  
6 74

7  
8 75 **Trial status**

9  
10 76 Recruitment for this study started on December 2018 while the first participant was  
11 77 randomized on January 2019. Recruitment is estimated to stop on October 2019.

12  
13 78

14  
15 79 **Strengths and limitations of this study**

16  
17 80 ■ This study is the first trial that concentrates on the best management on prevention of  
18 81 rebleeding for cirrhotic patients with HVPG between 16 and 20 mmHg.

19  
20 82 ■ This trial is the first one to compare the effectiveness of laparoscopic therapy plus  
21 83 propranolol to endoscopic therapy plus propranolol recommended by international  
22 84 guidelines.

23  
24 85 ■ The surgical procedure involved in this study employs minimally invasive laparoscopy  
25 86 instead of conventional operation, minimizing trauma and complications.

26  
27 87 ■ Limitations of this trial include the lack of accessible data for sample size estimation,  
28 88 potential influence in applicability in other countries due to etiological differences and  
29 89 the relatively short follow-up period.

30  
31 90

32  
33 91 **INTRODUCTION**

34  
35 92 Cirrhosis is the result of multiple liver diseases and is accounted as a dynamic process.<sup>1</sup>

36  
37 93 Portal hypertension is a vital event in the natural progression of cirrhosis that is responsible  
38 94 for decompensating events like gastroesophageal variceal bleeding, ascites and hepatic  
39 95 encephalopathy. Gastroesophageal varices could be seen in about 50% of cirrhotic patients  
40 96 and those who developed variceal bleeding face a mortality of 5-20%.<sup>2,3</sup> Thus, the  
41 97 stratification and applicable secondary prevention for patients with high risk is of great  
42 98 clinical significance.

43  
44 99 Hepatic venous pressure gradient (HVPG) is the difference between the wedged hepatic  
45 100 venous pressure and free hepatic venous pressure.<sup>4</sup> Eliminating the influence of abdominal  
46 101 pressure, HVPG is currently the most widely accepted reflection of portal pressure, and has  
47 102 been demonstrated to have good performances in risk stratification<sup>3,5</sup> and predicting the

1  
2  
3  
4 103 response to treatments.<sup>6,7</sup> An HVPG over 12 mmHg suggests the occurrence of  
5  
6 104 gastroesophageal variceal bleeding.<sup>8</sup> Patients with HVPG over 16mmHg face higher risk of  
7  
8 105 death <sup>8,9,10,11</sup> and rebleeding,<sup>6</sup> while an HVPG over 20 mmHg predicts failure to control  
9  
10 106 bleeding, early rebleeding, and death due to acute variceal hemorrhage.<sup>12,13</sup> Currently,  
11  
12 107 international guidelines recommend endoscopic therapy combined with non-selective beta-  
13  
14 108 blockers to be the first-line therapy of secondary prevention for cirrhotic patients with  
15  
16 109 gastroesophageal variceal bleeding.<sup>3,5</sup> Nevertheless, patients with high HVPG still suffer  
17  
18 110 from risk of treatment failure. Recent years, early transjugular intrahepatic portal-systemic  
19  
20 111 shunts is recommended as a better choice for patients with HVPG  $\geq 20$  mmHg,<sup>14,15</sup> while  
21  
22 112 there still lack a strong evidence to determine the best method for patients with HVPG  
23  
24 113 between 16 and 20 mmHg.

25 114 Splenectomy and pericardial devascularization, first performed by Hassab,<sup>16,17</sup> is a promising  
26  
27 115 surgical procedure for cirrhotic patients with gastroesophageal variceal bleeding, especially  
28  
29 116 for those with hypersplenism. With the rapid advance of laparoscopic techniques, since the  
30  
31 117 first laparoscopic splenectomy was reported in 1991,<sup>18</sup> post-operational complications which  
32  
33 118 used to be a major concern of Hassab's operation have been cut down to a great extent due to  
34  
35 119 less invasive procedures.<sup>19</sup> Laparoscopic splenectomy and pericardial devascularization  
36  
37 120 (laparoscopic therapy) has been widely accepted for variceal bleeding in Asia-pacific  
38  
39 121 countries, where the predominant etiology of cirrhosis is hepatitis B virus infection<sup>20</sup>  
40  
41 122 combined with very high occurrence of hypersplenism.<sup>21</sup> However, there haven't been any  
42  
43 123 prospective trials comparing the effectiveness of laparoscopic therapy plus propranolol to the  
44  
45 124 internationally recommended first-line therapy. Also, the precise indication to perform  
46  
47 125 laparoscopic therapy is still unclear.

48 126 In this study, the outcomes of recruited patients whose HVPG lies within 16 and 20 mmHg  
49  
50 127 will be compared to explore the optimized management. Taking into consideration the  
51  
52 128 preferred performance of HVPG in risk stratification and the lack of prospective study in  
53  
54 129 long-term performance of laparoscopic therapy, this trial will be meaningful for both the  
55  
56 130 extension of HVPG risk stratification and the clarification of laparoscopic therapy indication.

57  
58 131

## 132 **Objectives**

1  
2  
3  
4 133 The aim of this trial is to assess the effectiveness and safety of laparoscopic therapy plus  
5  
6 134 propranolol as first-line therapy of variceal rebleeding prevention for cirrhotic patients whose  
7  
8 135 transjugular HVPG lies between 16 and 20 mmHg with gastroesophageal variceal bleeding  
9  
10 136 compared with endoscopic therapy plus propranolol. The primary outcome will be variceal  
11  
12 137 rebleeding. Secondary outcomes include: death, hepatocellular carcinoma, venous  
13  
14 138 thrombosis, adverse events, quality of life and tolerability of treatment. We hypothesise that:  
15  
16 139 1. Compared to endoscopic therapy plus propranolol, laparoscopic therapy plus propranolol is  
17  
18 140 more effective in reducing variceal rebleeding.  
19  
20 141 2. Participants receiving laparoscopic therapy plus propranolol show non-inferior overall  
21  
22 142 survival over those receiving endoscopic therapy plus propranolol.  
23  
24 143 3. Participants receiving laparoscopic therapy plus propranolol show lower occurrence of  
25  
26 144 hepatocellular carcinoma over those receiving endoscopic therapy plus propranolol.  
27  
28 145

## 146 **METHODS AND ANALYSIS**

### 147 **Study design**

148 This study is a multicenter, prospective, randomized controlled clinical trial. The overview of  
149 the study process is illustrated in Figure 1. After screened for eligibility and measurement of  
150 HVPG, the participants will be randomly allocated to laparoscopic group or endoscopic  
151 group. After the operative intervention, there will be a 60-week follow-up period. All tests  
152 and interventions will be performed at three involved centers in China: (1) Shunde Hospital,  
153 Southern Medical University, (2) Xingtai People's Hospital and (3) The First Hospital of  
154 Lanzhou University.

### 156 **Eligibility criteria**

#### 157 **Inclusion criteria**

158 Eligible participants should be (a) aged between 18 to 75 years, (b) clinically and/or  
159 pathologically diagnosed cirrhosis with portal hypertension, (c) with a history of  
160 gastroesophageal variceal bleeding (melena, hematemesis etc.), without receiving  
161 splenectomy or any secondary prevention, (d) screened with transjugular HVPG between 16  
162 and 20 mmHg after hospitalization, (e) with Eastern Cooperative Oncology Group (ECOG)

1  
2  
3  
4 163 score  $\leq 2$  and Karnofsky performance status (KPS) score  $\geq 60$  during screening, (f) assessed  
5  
6 164 to be Child-Pugh class A or B, and (g) voluntarily participate in the study and able to provide  
7  
8 165 written informed consent and able to understand and willing to comply with the requirements  
9  
10 166 of the study.

#### 11 167 12 13 168 Exclusion criteria

14  
15 169 Those who conforms to any of the following would be excluded: (a) pregnant or  
16  
17 170 breastfeeding women, (b) with prior known or suspected malignancy (hepatocellular  
18  
19 171 carcinoma, cholangiocarcinoma etc.), (c) with limited coagulation situation (Quick  $< 50\%$ ,  
20  
21 172 partial thromboplastin time (PTT)  $> 50$  sec, platelet count  $< 50000 / \mu\text{l}$  or qualitative platelet  
22  
23 173 dysfunction that affects conglutination function of congenital (Bernard-Soulier syndrome,  
24  
25 174 Glanzmann thrombasthenia, storagepool disease, aspirin-like defects, platelet-type Von  
26  
27 175 Willebrand disease, etc) or acquired (medication or other systemic diseases) causes), (d) with  
28  
29 176 massive ascites, (e) assessed to be Child-Pugh class C, (f) refusing or inadequate for  
30  
31 177 transjugular HVPG measurement, (g) with active bleeding upon screening, (h) patients with  
32  
33 178 recurrent bleeding and (i) with other situations whose existence judged inadequate for  
34  
35 179 participation by the investigators.

36  
37 180

#### 38 39 181 **Recruitment**

40  
41 182 Recruitment has started in December 2018 and will continue until the intent sample size has  
42  
43 183 been reached. Participants ( $n = 40$ ) from China are recruited in three sites through (1) posters,  
44  
45 184 which show the condition of the trial, (2) social media (ie, websites, WeChat) and (3) the  
46  
47 185 advice of the doctors.

48  
49 186

#### 50 51 187 **Patient and public involvement**

52  
53 188 Patients and public were not involved in the design and development of the study.

54  
55 189

#### 56 57 190 **Randomization**

58  
59 191 Eligible patients will be randomly allocated (1:1) to either the laparoscopic group or the  
60  
192 endoscopic group after signing on an informed consent, before which the patients will be

1  
2  
3  
4 193 informed about the trial in detail. The groups will be stratified by Child-Pugh class, age ( $\leq 60$   
5 194 years or  $> 60$  years) and gender. For the randomization, the randPack package of R  
6 195 software (R Project for Statistical Computing, Vienna, Austria) will be introduced. The  
7 196 randomization will be generated by a statistician independent of the study.  
8  
9  
10  
11  
12

### 13 198 **HVPG measurement**

15 199 Transjugular HVPG measurement will be performed for all participants when screening for  
16 200 eligibility by experienced interventional radiologists. The procedure will be performed using  
17 201 a balloon catheter with a pressure transducer at the tip (Edwards Lifesciences, Irvine,  
18 202 California). At first, a zero measurement will be made with the transducer open to air. After  
19 203 transjugular catheterization, free hepatic venous pressure will be measured in the right  
20 204 hepatic vein at about 1-3 cm from the inferior vena cava. Then, the right hepatic vein will be  
21 205 occluded completely by the inflated balloon, after which will the wedged hepatic venous  
22 206 pressure be measured. The measurement will be continued until the pressure reach a plateau.  
23 207 Measurements will be performed in at least triplicate, and the average value will be used.  
24 208 HVPG is the difference between wedged hepatic venous pressure and free hepatic venous  
25 209 pressure.  
26  
27  
28  
29  
30  
31  
32  
33  
34  
35  
36  
37  
38  
39

### 40 211 **Operative interventions**

41 212 All operative interventions will be performed by trained and experienced specialists affiliated  
42 213 to the university centers. Doppler ultrasonography, computed tomography (CT),  
43 214 electrocardiogram and esophagogastroduodenoscopy will be performed routinely pre-  
44 215 operation.  
45  
46  
47  
48  
49

50 217 Participants assigned to the laparoscopic group will undergo laparoscopic therapy within 48h  
51 218 after randomization. Laparoscopic therapy will be performed as previously described.<sup>20</sup>  
52 219 General anesthesia will be applied for all participants. Major procedures of the operation  
53 220 include splenectomy and the dissection and ligation of short gastric vessels, posterior gastric  
54 221 vessels and all branches of proximal lesser curvature, cardia and lower 6 to 8 cm part of  
55 222 abdominal esophagus from the stomach coronary vein. During the process of



223 devascularization, the high esophageal branches and heterotopic high esophageal branches  
224 will be carefully screened.

225  
226 Participants assigned to the endoscopic group will undergo initial endoscopic therapy within  
227 48h after randomization. Candidate procedures for endoscopic therapy include endoscopic  
228 variceal ligation (EVL), cyanoacrylate glue injection and sclerotherapy. Decision of which  
229 procedure to adopt will be made by experienced specialist according to the condition of the  
230 participant, while EVL will be considered the first option as recommended by guidelines.<sup>3,5</sup>  
231 Treatments will be performed again every 1-2 week until completely eradication of varices.

### 232 233 **Propranolol oral administration**

234 Participants assigned to both groups will begin to receive propranolol after the  
235 randomization. Propranolol shall be administrated orally while keeping monitoring the heart  
236 rate and blood pressure daily, starting from 20-40 mg b.i.d and adjusting every 2 or 3 days  
237 (maximum dose: 320 mg/d for participants without ascites, 160 mg/d for participants with  
238 ascites) to achieve a resting heart rate of 55-60 beats/min while the systolic blood pressure  
239 maintain > 90 mmHg.<sup>5</sup> The dose can always be adjusted according to the response on  
240 participants.

### 241 242 **Outcomes and assessments**

#### 243 **Primary outcome**

244 In order to compare the effectiveness of laparoscopic group with endoscopic group, the  
245 primary outcome of the study is set to be variceal rebleeding. Endpoints will be 1-year  
246 rebleeding rate and rebleeding time.

#### 247 248 **Secondary outcomes**

249 Secondary outcomes include: death, hepatocellular carcinoma, venous thrombosis, adverse  
250 events, quality of life and tolerability of treatment. Following endpoints will be applied,  
251 respectively: (1) overall survival, (2) the occurrence of hepatocellular carcinoma, (3) the  
252 occurrence of venous thrombosis, (4) the occurrence of adverse events, (5) quality of life

(QOL) score and (6) KPS score. Occurrence of adverse events, QOL score and KPS score are treated as the reflection of safety and tolerability of treatment. Length stay and intra-hospital mortality will be recorded also to this end and treated as outcome candidates. Also, serum markers will be introduced for monitor of change on liver functions and compared between two groups.

**Table 1 Assessments and time points**

| Assessment                 | Time points   |                |     |     |     |     |     |
|----------------------------|---------------|----------------|-----|-----|-----|-----|-----|
|                            | Pre-operation | Post-operation | 12w | 24w | 36w | 48w | 60w |
| HVPG measurement           | x             |                |     |     |     |     |     |
| Laboratory tests           | x             |                | x   | x   | x   | x   | x   |
| Color Doppler ultrasound   | x             |                |     |     |     |     |     |
| Liver stiffness            | x             |                |     |     |     |     |     |
| CT                         | x             |                |     |     |     |     |     |
| Esophagogastroduodenoscopy | x             | x              |     |     |     |     |     |
| Electrocardiogram          | x             |                |     |     |     |     |     |
| QOL                        |               |                | x   | x   | x   | x   | x   |
| KPS                        |               |                | x   | x   | x   | x   | x   |

Assessments  
Time points of involved assessments to be performed are outlined in Table 1. For participants allocated to either the groups, the following assessments will be performed and corresponding data will be collected:

1. Demographic characteristics including gender, height, weight, date of birth and ethnic.
2. Transjugular measurement of HVPG.
3. Disease history with clear record about the number of occurrence of gastroesophageal variceal bleeding and other complexes including ascites, spontaneous bacterial peritonitis, hepatic encephalopathy, electrolyte imbalance, portal venous thrombosis, hepatorenal syndrome and hepatopulmonary syndrome, etc.
4. Clinical diagnosis and etiology for cirrhosis.
5. Laboratory test results including red blood cells, white blood cells, hemoglobin, blood ammonia, platelet count, prothrombin time, activated partial thromboplastin time, international normalized ratio, total bilirubin, direct and indirect bilirubin, glutamine transferase, alanine aminotransferase, aspartate aminotransferase, albumin and serum

1  
2  
3  
4 274 creatinine.

5 275 6. Color Doppler ultrasound results including general condition of spleen and liver, spleen

6 276 diameter, portal vein diameter, portal vein velocity, splenic vein velocity, splenic venous

7 277 reflux, cardiac output, left ventricular ejection fraction and heart output.

8 278 7. Liver stiffness and spleen stiffness assessed by FibroTouch or FibroScan.

9 279 8. Abdominal CT scans.

10 280 9. Esophagogastroduodenoscopy results including the location, classification, diameter of

11 281 varices and red signs.

12 282 10. Electrocardiogram results.

13 283 11. Child-Pugh score and classes.

14 284 12. Model for end-stage liver disease (MELD) score.

15 285 13. QOL score.

16 286 14. KPS score.

17 287 15. Adjustment records of dosage of propranolol.

18 288 16. Adverse events and severe adverse events of any cause.

19 289 17. Length stay.

20 290 Upon occurrence of the first variceal rebleeding after the operative intervention, the

21 291 following data will be additionally collected:

22 292 1. Cause of rebleeding.

23 293 2. Time of rebleeding since enrollment.

24 294 3. Treatment and outcome of the rebleeding.

25 295 Upon death of a participant, the following data will be additionally collected:

26 296 1. Time of death since enrollment.

27 297 2. Cause of death.

28 298

29 299 **Sample size estimation**

30 300 No study has yet compared the outcome between cirrhotic patients with gastroesophageal

31 301 variceal bleeding receiving either laparoscopic therapy or endoscopic therapy. Also, because

32 302 of the lack of study restricting HVPG baseline level and studies about laparoscopic therapy

33 303 plus propranolol oral administration, the sample size is determined based on pooled data of

variceal rebleeding rate of several studies including endoscopic therapy plus propranolol oral administration or laparoscopic therapy. The variceal rebleeding rate of endoscopic therapy plus propranolol oral administration is estimated by 6 randomized controlled trials (Table 2).<sup>22,23,24,25,26,27</sup> The variceal rebleeding rate of laparoscopic therapy is estimated by 6 retrospective studies (Table 2).<sup>20,28,29,30,31,32</sup> Pooled rates of variceal rebleeding for endoscopic group and laparoscopic group are 44% and 6%, respectively. Considering a type I error rate ( $\alpha$ ) of 5% and a type II error rate ( $1-\beta$ ) of 20% and a dropout rate of 10%, the calculated sample size for this trial is 40.

**Table 2 Variceal rebleeding rates in cirrhotic patients with portal hypertension bleeding treated by endoscopic therapy plus propranolol or laparoscopic therapy: a review of 12 studies.**

| Laparoscopic therapy |                    |                          | Endoscopic therapy plus propranolol |                    |                          |
|----------------------|--------------------|--------------------------|-------------------------------------|--------------------|--------------------------|
| First author, year   | Number of patients | Number of rebleeding (%) | First author, year                  | Number of patients | Number of rebleeding (%) |
| Zheng, 2018          | 250                | 9 (3.6%)                 | Lv, 2018                            | 25                 | 13 (52%)                 |
| Bai, 2017            | 40                 | 2 (5%)                   | Holster, 2016                       | 35                 | 10 (28.6%)               |
| Bao, 2017            | 76                 | 19 (25%)                 | Luo, 2015                           | 36                 | 21 (58.3%)               |
| Cheng, 2014          | 204                | 7 (3.4%)                 | Hung, 2012                          | 47                 | 22 (46.8%)               |
| Jiang, 2009          | 26                 | 0 (0%)                   | Sauer, 2002                         | 40                 | 12 (30%)                 |
| Wang, 2008           | 22                 | 0 (0%)                   | Rössle, 1997                        | 62                 | 29 (46.8%)               |

### Safety

Laparoscopic therapy is accepted and performed in Asia-pacific countries, while endoscopic therapy is generally implemented worldwide. Both surgical interventions showed low risks of severe adverse events. Possible risks related to interventions include: adverse events related to HVPG measurement (including but not limited to arrhythmia, allergy, intraoperative hemorrhage and ecchymoma) endoscopic therapy (including but not limited to nausea, vomit, fervescence, esophagostenosis, esophageal ulcer, dysphagia and early rebleeding), laparoscopic therapy (including but not limited to intraoperative hemorrhage, portal vein thrombosis, subphrenic infection, pancreatic fistula and early rebleeding) and side-effects of propranolol. Participants and whose relatives will be able to contact the study team when any severe adverse event or disease complication occurs. The participants who rebled will receive

325 proper treatments according to the recommendations of the Baveno VI guideline<sup>3</sup> as soon as  
326 feasible. Liver transplantation will be performed in an expedite manner in cases it is needed.

327 The following data will be recorded when an adverse event occurs:

- 328 1. The exact kind of adverse event.
- 329 2. The starting, ending and reporting time of the adverse event.
- 330 3. Severity of the adverse event.
- 331 4. Treatment and outcome of the adverse event.

332 Adverse events will be documented and reported to the investigators and ethics board of the  
333 involved center in 48h. Severe adverse events will be documented and reported to the  
334 investigators and ethics board of the involved center, principle investigator and supervision  
335 departments required by GCP immediately.

#### 337 **Data management**

338 For imaging data, the electronic form images will be collected. Other raw data will be  
339 recorded in the written form case report form first and saved electronically afterwards. All  
340 electronic data will be kept by a member of the study team without direct clinical contact  
341 with any of the centers. All written form data will be stored in cabinets with lock permitting  
342 access for only investigators. All data will be kept for 25 years after publication and  
343 destroyed after then.

#### 345 **Statistical analyses**

346 Statistical analyses will be performed in intention-to-treat cases. A case will be censored  
347 when the participant received liver transplantation. Subgroup analysis will be performed for  
348 Child-Pugh class A and class B patients respectively. Continuous variables will be shown as  
349 mean ( $\pm$ SE) or median (range). No interim analyses will be conducted on the primary  
350 outcome. Multivariate COX regression model including age, sex, platelet, HVP, aspartate  
351 aminotransferase, alanine aminotransferase, albumin, total bilirubin, MELD score and Child-  
352 Pugh score as confounders will be introduced for analyses of variceal rebleeding and  
353 survival, while applying Kaplan-Meier analysis with Log-rank test for inter-group  
354 comparison. Occurrence data including variceal rebleeding, overall survival, hepatocellular

1  
2  
3  
4 355 carcinoma and portal venous thrombosis will be compared using the chi square test. The  
5  
6 356 occurrence of all adverse events will also be collected, described and compared using chi  
7  
8 357 square test overall and specifically. For data with repeated measurements including QOL  
9  
10 358 score, KPS score and laboratory tests results, repeated measures ANOVA will be applied.  
11  
12 359 Student's t test or Wilcoxon rank sum test (for continuous data) and chi square test or  
13  
14 360 Fisher's exact test (for discrete variable) will be applied for analyses of other unmentioned  
15  
16 361 outcomes. All results will be presented with 95% CIs.

## 17 362 18 363 **DISCUSSION**

19  
20 364 To the best of our knowledge, this study is the first to compare the effectiveness and safety of  
21  
22 365 laparoscopic therapy plus propranolol with endoscopic therapy plus propranolol, the first-line  
23  
24 366 therapy recommended by international guidelines,<sup>3,5</sup> under an HVPG-guided manner. The  
25  
26 367 risk stratification performance of HVPG has been receiving more concentration and several  
27  
28 368 attempts have been made on HVPG-guided therapy.<sup>33,34</sup> By introducing HVPG restriction as  
29  
30 369 an eligibility criterion, this study targets the population that faces high risk of variceal  
31  
32 370 rebleeding and death<sup>6,8,9,10,11</sup> better, enabling exploration of better management for these  
33  
34 371 patients as well as extension of clinical performance of HVPG.

35  
36 372 The first splenectomy and pericardial devascularization was performed by Hassab in 1964<sup>35</sup>  
37  
38 373 and modified by Qiu Fazu in 1981.<sup>36</sup> Benefitted from the rapid development of laparoscopic  
39  
40 374 equipment and techniques, surgical procedures for variceal bleeding are becoming  
41  
42 375 decreasingly invasive and also with much lower occurrence of adverse events.<sup>20,29,37,38,39</sup> Such  
43  
44 376 laparoscopic therapy has been accepted as one of the most common used methods for variceal  
45  
46 377 bleeding in Asia-pacific countries. Pericardial devascularization and splenectomy increase the  
47  
48 378 blood flow of hepatic artery while lower portal pressure and ameliorate leukopenia and  
49  
50 379 thrombocytopenia. Thus, laparoscopic therapy is considered an effective method for variceal  
51  
52 380 bleeding while benefitting liver function with satisfying performance on long-term survival  
53  
54 381 and general condition of patients. However, it is also reported to be correlated with high  
55  
56 382 occurrence of portal venous thrombosis<sup>40</sup> and exacerbation of portal hypertensive  
57  
58 383 gastropathy.<sup>41</sup> Therefore, a multicenter prospective study about laparoscopic therapy will  
59  
60 384 provide valuable information for the clarification of its influence to the overall outcome.

1  
2  
3  
4 385 Endoscopic therapy plus non-selective beta blockers is recommended as the first-line therapy  
5  
6 386 and widely served as control groups in many studies.<sup>22,23,24,25,26,27,42</sup> On the contrary, studies  
7  
8 387 about laparoscopic therapy are mainly single-arm<sup>20,32,43</sup> or compared with variants and other  
9  
10 388 surgeries.<sup>28,29,30,31,40,44,45</sup> To the best of our knowledge, there haven't been any trials about  
11  
12 389 laparoscopic therapy using endoscopic therapy plus non-selective beta blockers as controls.  
13  
14 390 Thus, this study will also provide data with better comparability to other commonly used  
15  
16 391 therapies.  
17  
18 392 Still, this study has several limitations. First, this is the first prospective study investigating  
19  
20 393 the HVPG-guided therapeutic effect of laparoscopic therapy plus propranolol and endoscopic  
21  
22 394 therapy plus propranolol. The lack of enough previous studies may lead to deviations in  
23  
24 395 sample size estimation. Second, the major cause of cirrhosis of the target population of this  
25  
26 396 study is hepatitis B virus infection while it is more complex in American and European  
27  
28 397 countries. Differences in etiology may bring problems in applicability. Third, the period of  
29  
30 398 follow-up in this study is set to be about one year, which may not be enough to thoroughly  
31  
32 399 unfold the long-term effect of laparoscopic therapy, the occurrence of hepatocellular  
33  
34 400 carcinoma, especially. Patients with HVPG higher than 10 mmHg suffer from a 6-fold-  
35  
36 401 increased incidence of hepatocellular carcinoma.<sup>46</sup> Due to the effect of lower portal pressure  
37  
38 402 of laparoscopic therapy, we expect a decrease in the incidence of hepatocellular carcinoma.  
39  
40 403 We may not be likely to observe this difference owing to the short designed follow-up  
41  
42 404 duration. However, follow-up will still be continued for the participants after the end of this  
43  
44 405 study, somehow making up for this drawback.  
45  
46 406

#### 407 **ETHICS AND DISSEMINATION**

408 Ethical approval was obtained from the ethics committee of Shunde Hospital, Southern  
409 Medical University, the ethics committee of Xingtai People's Hospital, and the ethics  
410 committee of The First Hospital of Lanzhou University. Any modifications in protocol will  
411 be done under the premise of adequate communication and approval. All interventions and  
412 assessments included in this trial will be in full compliance with Good Clinical Practice  
413 (GCP).  
414 Before the allocation, all participant candidates will be fully informed about the purpose,

1  
2  
3  
4 415 process and possible consequences of the trial. Before any treatment, the participants will be  
5  
6 416 informed about the interventions they will undergo and the interventions will not be applied  
7  
8 417 before a written informed consent signed by the participants themselves is provided.  
9  
10 418 The result of this trial (CHESS1803) will be presented at national and international  
11  
12 419 conferences and published in peer-reviewed journals.

13  
14 420

15  
16 421 **Author affiliations**

- 17  
18 422 1. CHESS Center, The First Hospital of Lanzhou University, Lanzhou, China  
19  
20 423 2. Department of Hematology, Nanfang Hospital, Southern Medical University, Guangzhou, China  
21  
22 424 3. Department of Hepatobiliary Surgery, Xingtai Institute of Cancer Control, Xingtai, China  
23  
24 425 4. Department of Hepatobiliary Surgery, The Third People's Hospital of Shenzhen, Shenzhen, China  
25  
26 426 5. Department of General Surgery, The Fifth Medical Center of PLA General Hospital, Beijing, China  
27  
28 427 6. Department of Hepatobiliary Surgery, Shunde Hospital, Southern Medical University, Foshan, China

29  
30 428

31 429 **Contributors** Xiaolong Qi, Weidong Wang, Changzeng Zuo, Zhiwei Li and Xun Li conceived and  
32  
33 430 designed the study. Qingbo Liu, Weijie Zhang, Xiaorong Mao, Xiaojing Song, Jitao Wang, Lei Li and  
34  
35 431 Chuan Liu are responsible of the data collecting and management. Ruoyang Shao and Yanna Liu drafted  
36  
37 432 this manuscript. Ruizhao Qi, Xin Zhao and Xiaolong Qi critically revised the manuscript. The final version  
38  
39 433 of the manuscript was reviewed and approved by all authors.

40  
41 434

42  
43 435 **Funding** This work is funded by the grants from National Natural Science Foundation of China  
44  
45 436 (81600510); Guangdong Science Fund for Distinguished Young Scholars (2018B030306019); Guangzhou  
46  
47 437 Industry-Academia-Research Collaborative Innovation Major Project (201704020015).

48  
49 438

50  
51 439 **Disclaimer** The funders do not participate in the design, recruitment, intervention, data collection, data  
52  
53 440 management and analysis of the study and the preparation and revision of this protocol.

54  
55 441

56  
57 442 **Competing interests** None declared.

58  
59 443

60



1  
2  
3  
4 444 **Patient consent for publication** Obtained.

5 445

6  
7 446 **Ethics approval** This study has been approved by the ethics committee of Shunde Hospital, Southern  
8  
9 447 Medical University (20190104); Xingtai People's Hospital ([2019]001); The First Hospital of Lanzhou  
10  
11 448 University (LDYYLL2019-179).

12  
13 449

14  
15 450 **Provenance and peer review** Not commissioned; internally peer reviewed.

16  
17 451

18  
19 452 **Data availability statement** All data from this study will be made available upon reasonable request. To  
20  
21 453 request for data, please contact the corresponding author.

22  
23 454

24  
25 455 **Open access** This is an open access article distributed in accordance with the Creative Commons  
26  
27 456 Attribution Non Commercial (CC BY-NC 4.0) license, which permits others to distribute, remix, adapt,  
28  
29 457 build upon this work non-commercially, and license their derivative works on different terms, provided the  
30  
31 458 original work is properly cited, appropriate credit is given, any changes made indicated, and the use is non-  
32  
33 459 commercial. See: <http://creativecommons.org/licenses/by-nc/4.0/>.

34  
35 460

## 36 461 **References**

- 37  
38 462 1. Tsochatzis EA, Bosch J, Burroughs AK. Liver cirrhosis. *The Lancet* 2014;383:1749-61.  
39  
40 463 2. Garcia-Tsao G, Bosch J. Management of varices and variceal hemorrhage in cirrhosis. *The New England*  
41 464 *journal of medicine* 2010;362:823-32.  
42  
43 465 3. de Franchis R, Baveno VIF. Expanding consensus in portal hypertension: Report of the Baveno VI Consensus  
44 466 Workshop: Stratifying risk and individualizing care for portal hypertension. *Journal of hepatology* 2015;63:743-  
45 467 52.  
46  
47 468 4. Bosch J, Abraldes JG, Berzigotti A, et al. The clinical use of HVPG measurements in chronic liver disease.  
48 469 *Nature reviews Gastroenterology & hepatology* 2009;6:573-82.  
49  
50 470 5. Garcia-Tsao G, Abraldes JG, Berzigotti A, et al. Portal hypertensive bleeding in cirrhosis: Risk stratification,  
51 471 diagnosis, and management: 2016 practice guidance by the American Association for the study of liver  
52 472 diseases. *Hepatology* 2017;65:310-35.  
53  
54 473 6. Li GQ, Yang B, Liu J, et al. Hepatic venous pressure gradient is a useful predictor in guiding treatment on  
55 474 prevention of variceal rebleeding in cirrhosis. *International journal of clinical and experimental medicine*  
56 475 2015;8:19709-16.  
57  
58 476 7. Qi XS, Fan DM. Hepatic venous pressure gradient measurement before TIPS for acute variceal bleeding.  
59 477 *World journal of gastroenterology* 2014;20:7523-4.  
60  
60 478 8. Garcia-Tsao G, Groszmann RJ, Fisher RL, et al. Portal pressure, presence of gastroesophageal varices and

- 1  
2  
3 479 variceal bleeding. *Hepatology* 1985;5:419-24.
- 4 480 9. Berzigotti A, Rossi V, Tiani C, et al. Prognostic value of a single HVPG measurement and Doppler-ultrasound  
5 481 evaluation in patients with cirrhosis and portal hypertension. *Journal of gastroenterology* 2011;46:687-95.
- 6 482 10. Silva-Junior G, Baiges A, Turon F, et al. The prognostic value of hepatic venous pressure gradient in patients  
7 483 with cirrhosis is highly dependent on the accuracy of the technique. *Hepatology* 2015;62:1584-92.
- 8 484 11. Merkel C, Bolognesi M, Bellon S, et al. Prognostic usefulness of hepatic vein catheterization in patients with  
9 485 cirrhosis and esophageal varices. *Gastroenterology* 1992;102:973-9.
- 10 486 12. Moitinho E, Escorsell A, Bandi JC, et al. Prognostic value of early measurements of portal pressure in acute  
11 487 variceal bleeding. *Gastroenterology* 1999;117:626-31.
- 12 488 13. Monescillo A, Martinez-Lagares F, Ruiz-del-Arbol L, et al. Influence of portal hypertension and its early  
13 489 decompression by TIPS placement on the outcome of variceal bleeding. *Hepatology* 2004;40:793-801.
- 14 490 14. Garcia-Pagan JC, Caca K, Bureau C, et al. Early use of TIPS in patients with cirrhosis and variceal bleeding.  
15 491 *The New England journal of medicine* 2010;362:2370-9.
- 16 492 15. Zhang M, Wang G, Zhao L, et al. Second prophylaxis of variceal bleeding in cirrhotic patients with a high  
17 493 HVPG. *Scandinavian journal of gastroenterology* 2016;51:1502-06.
- 18 494 16. Hassab MA. Gastroesophageal decongestion and splenectomy in the treatment of esophageal varices in  
19 495 bilharzial cirrhosis: further studies with a report on 355 operations. *Surgery* 1967;61:169-76.
- 20 496 17. Hassab MA, Younis MT, el-Kilany MS. Gastroesophageal decongestion and splenectomy in the treatment of  
21 497 esophageal varices secondary to bilharzial cirrhosis: anatomical and experimental studies. *Surgery*  
22 498 1968;63:731-7.
- 23 499 18. Delaitre B, Maignien B. [Splenectomy by the laparoscopic approach. Report of a case]. *Presse medicale*  
24 500 (Paris, France : 1983) 1991;20:2263.
- 25 501 19. Wang Y, Zhan X, Zhu Y, et al. Laparoscopic splenectomy in portal hypertension: a single-surgeon 13-year  
26 502 experience. *Surgical endoscopy* 2010;24:1164-9.
- 27 503 20. Cheng Z, Li JW, Chen J, et al. Therapeutic effects of laparoscopic splenectomy and esophagogastric  
28 504 devascularization on liver cirrhosis and portal hypertension in 204 cases. *Journal of laparoendoscopic &*  
29 505 *advanced surgical techniques Part A* 2014;24:612-6.
- 30 506 21. Sun Y, Lan X, Shao C, et al. Clinical features of idiopathic portal hypertension in China: A retrospective study  
31 507 of 338 patients and literature review. *Journal of gastroenterology and hepatology* 2018.
- 32 508 22. Lv Y, Qi X, He C, et al. Covered TIPS versus endoscopic band ligation plus propranolol for the prevention of  
33 509 variceal rebleeding in cirrhotic patients with portal vein thrombosis: a randomized controlled trial. *Gut*  
34 510 2018;67:2156-68.
- 35 511 23. Holster IL, Tjwa ET, Moelker A, et al. Covered transjugular intrahepatic portosystemic shunt versus  
36 512 endoscopic therapy + beta-blocker for prevention of variceal rebleeding. *Hepatology* 2016;63:581-9.
- 37 513 24. Luo X, Wang Z, Tsauo J, et al. Advanced Cirrhosis Combined with Portal Vein Thrombosis: A Randomized  
38 514 Trial of TIPS versus Endoscopic Band Ligation Plus Propranolol for the Prevention of Recurrent Esophageal  
39 515 Variceal Bleeding. *Radiology* 2015;276:286-93.
- 40 516 25. Hung HH, Chang CJ, Hou MC, et al. Efficacy of non-selective beta-blockers as adjunct to endoscopic  
41 517 prophylactic treatment for gastric variceal bleeding: a randomized controlled trial. *Journal of hepatology*  
42 518 2012;56:1025-32.
- 43 519 26. Sauer P, Hansmann J, Richter GM, et al. Endoscopic variceal ligation plus propranolol vs. transjugular  
44 520 intrahepatic portosystemic stent shunt: a long-term randomized trial. *Endoscopy* 2002;34:690-7.
- 45 521 27. Rössle M, Deibert P, Haag K, et al. Randomized trial of transjugular-intrahepatic-portosystemic shunt  
46 522 versus endoscopy plus propranolol for prevention of variceal rebleeding. *The Lancet* 1997;349:1043-49.

- 1  
2  
3 523 28. Bai D-S, Chen P, Jin S-J, et al. Vagus nerve-preserving versus conventional laparoscopic splenectomy and  
4 524 azygoportal disconnection. *Surgical endoscopy* 2017;32:2696-703.
- 5 525 29. Zheng S, Sun P, Liu X, et al. Efficacy and safety of laparoscopic splenectomy and esophagogastric  
6 526 devascularization for portal hypertension: A single-center experience. *Medicine* 2018;97:e13703.
- 7 527 30. Bao H, He Q, Dai N, et al. Retrospective Study to Compare Selective Decongestive Devascularization and  
8 528 Gastrosplenic Shunt versus Splenectomy with Pericardial Devascularization for the Treatment of Patients with  
9 529 Esophagogastric Varices Due to Cirrhotic Portal Hypertension. *Medical Science Monitor* 2017;23:2788-95.
- 10 530 31. Jiang X-Z, Zhao S-Y, Luo H, et al. Laparoscopic and open splenectomy and azygoportal disconnection for  
11 531 portal hypertension. *World journal of gastroenterology* 2009;15:3421.
- 12 532 32. Wang YD, Ye H, Ye ZY, et al. Laparoscopic Splenectomy and Azygoportal Disconnection for Bleeding Varices  
13 533 with Hypersplenism. *Journal of Laparoendoscopic & Advanced Surgical Techniques* 2008;18:37-41.
- 14 534 33. Villanueva C, Graupera I, Aracil C, et al. A randomized trial to assess whether portal pressure guided  
15 535 therapy to prevent variceal rebleeding improves survival in cirrhosis. *Hepatology* 2017;65:1693-707.
- 16 536 34. Villanueva C, Aracil C, Colomo A, et al. Clinical trial: a randomized controlled study on prevention of  
17 537 variceal rebleeding comparing nadolol + ligation vs. hepatic venous pressure gradient-guided pharmacological  
18 538 therapy. *Alimentary pharmacology & therapeutics* 2009;29:397-408.
- 19 539 35. Hassab MA. GASTROESOPHAGEAL DECONGESTION AND SPLENECTOMY. A METHOD OF PREVENTION AND  
20 540 TREATMENT OF BLEEDING FROM ESOPHAGEAL VARICES ASSOCIATED WITH BILHARZIAL HEPATIC FIBROSIS:  
21 541 PRELIMINARY REPORT. *The Journal of the International College of Surgeons* 1964;41:232-48.
- 22 542 36. Qiu FZ. Evaluation of the pericardial devascularization in portal hypertension. *Zhonghua wai ke za zhi*  
23 543 [*Chinese journal of surgery*] 1983;21:275-7.
- 24 544 37. Zhan XL, Ji Y, Wang YD. Laparoscopic splenectomy for hypersplenism secondary to liver cirrhosis and portal  
25 545 hypertension. *World journal of gastroenterology* 2014;20:5794-800.
- 26 546 38. Yu H, Guo S, Wang L, et al. Laparoscopic Splenectomy and Esophagogastric Devascularization for Liver  
27 547 Cirrhosis and Portal Hypertension Is a Safe, Effective, and Minimally Invasive Operation. *Journal of*  
28 548 *laparoendoscopic & advanced surgical techniques Part A* 2016;26:524-30.
- 29 549 39. Liu Y, Li Y, Ma J, et al. A modified Hassab's operation for portal hypertension: experience with 562 cases.  
30 550 *The Journal of surgical research* 2013;185:463-8.
- 31 551 40. Sun L, Zhou H, Gu L, et al. Effects of surgical procedures on the occurrence and development of  
32 552 postoperative portal vein thrombosis in patients with cirrhosis complicated by portal hypertension.  
33 553 *International journal of surgery* 2015;16:31-35.
- 34 554 41. Huang Y, Wang W, Wang J, et al. Surgical treatment of portal hypertension: 45 year experience. *Zhonghua*  
35 555 *wai ke za zhi [Chinese journal of surgery]* 2000;38:85-8.
- 36 556 42. Sarin SK, Wadhawan M, Agarwal SR, et al. Endoscopic variceal ligation plus propranolol versus endoscopic  
37 557 variceal ligation alone in primary prophylaxis of variceal bleeding. *The American journal of gastroenterology*  
38 558 2005;100:797-804.
- 39 559 43. Wu SD, Fan Y, Kong J, et al. Transumbilical single-incision laparoscopic splenectomy plus pericardial  
40 560 devascularization using conventional instruments: initial experience of 5 cases. *Journal of laparoendoscopic &*  
41 561 *advanced surgical techniques Part A* 2013;23:150-3.
- 42 562 44. Ando K, Kurokawa T, Nagata H, et al. Laparoscopic surgery in the management of hypersplenism and  
43 563 esophagogastric varices: our initial experiences. *Surgical innovation* 2012;19:421-7.
- 44 564 45. Chen H, Yang F, Li TT, et al. Comparison of Efficacy of Laparoscopic and Open Splenectomy Combined With  
45 565 Selective and Nonselective Pericardial Devascularization in Portal Hypertension Patients. *Surgical laparoscopy,*  
46 566 *endoscopy & percutaneous techniques* 2018;28:401-03.

1  
2  
3 567 46. Ripoll C, Groszmann RJ, Garcia-Tsao G, et al. Hepatic venous pressure gradient predicts development of  
4 568 hepatocellular carcinoma independently of severity of cirrhosis. *J Hepatol.* 2009;50:923-8

5  
6  
7 569

8  
9 570 **Figure 1** Flow chart for study design.

10  
11 571  
12  
13  
14  
15  
16  
17  
18  
19  
20  
21  
22  
23  
24  
25  
26  
27  
28  
29  
30  
31  
32  
33  
34  
35  
36  
37  
38  
39  
40  
41  
42  
43  
44  
45  
46  
47  
48  
49  
50  
51  
52  
53  
54  
55  
56  
57  
58  
59  
60

For peer review only

1  
2  
3  
4  
5  
6  
7  
8  
9  
10  
11  
12  
13  
14  
15  
16  
17  
18  
19  
20  
21  
22  
23  
24  
25  
26  
27  
28  
29  
30  
31  
32  
33  
34  
35  
36  
37  
38  
39  
40  
41  
42  
43  
44  
45  
46  
47  
48  
49  
50  
51  
52  
53  
54  
55  
56  
57  
58  
59  
60

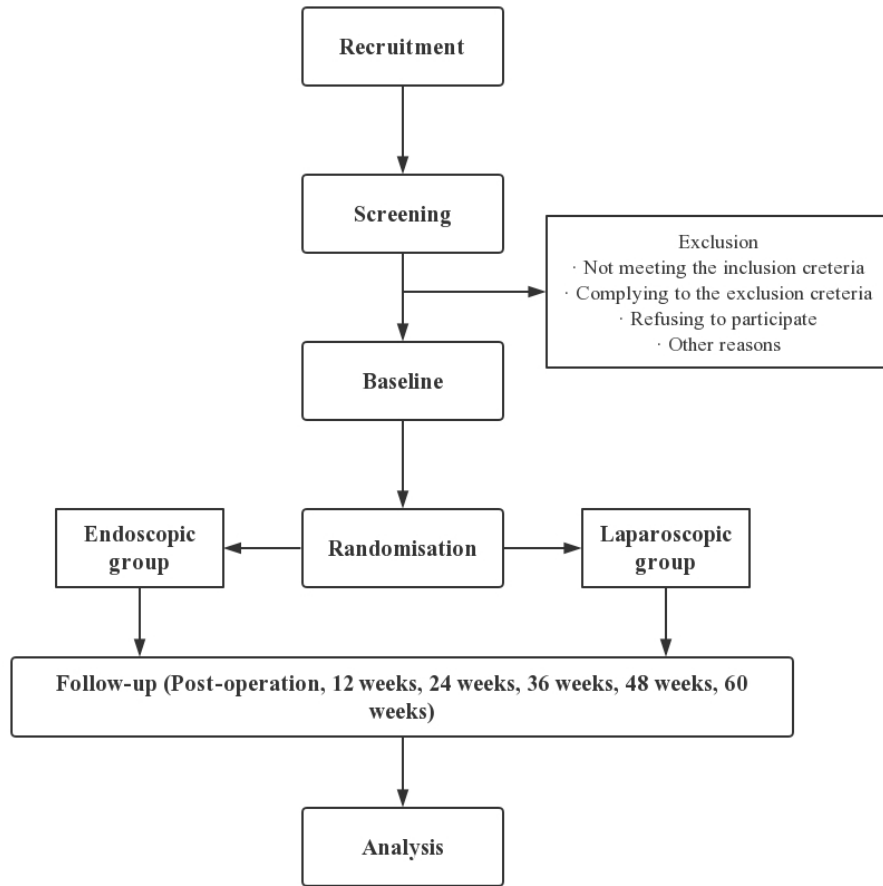

Flow chart for study design.

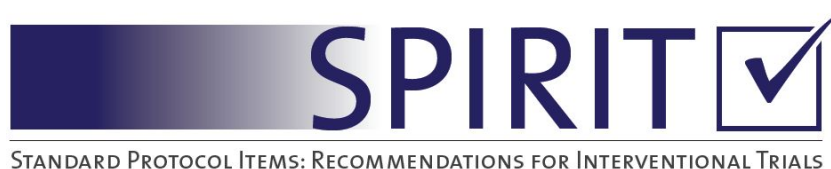

SPIRIT 2013 Checklist: Recommended items to address in a clinical trial protocol and related documents\*

| Section/item                                                  | Item No | Description                                                                                                                                                                                                                                                                              |
|---------------------------------------------------------------|---------|------------------------------------------------------------------------------------------------------------------------------------------------------------------------------------------------------------------------------------------------------------------------------------------|
| <b>Administrative information</b>                             |         |                                                                                                                                                                                                                                                                                          |
| Title (P 1/line 3)                                            | 1       | Descriptive title identifying the study design, population, interventions, and, if applicable, trial acronym                                                                                                                                                                             |
| Trial registration (P 3/line 72)                              | 2a      | Trial identifier and registry name. If not yet registered, name of intended registry                                                                                                                                                                                                     |
|                                                               | 2b      | All items from the World Health Organization Trial Registration Data Set                                                                                                                                                                                                                 |
| Protocol version                                              | 3       | Date and version identifier                                                                                                                                                                                                                                                              |
| Funding (P 16/line 433)                                       | 4       | Sources and types of financial, material, and other support                                                                                                                                                                                                                              |
| Roles and responsibilities (P 16/line 419)<br>(P 16/line 437) | 5a      | Names, affiliations, and roles of protocol contributors                                                                                                                                                                                                                                  |
|                                                               | 5b      | Name and contact information for the trial sponsor                                                                                                                                                                                                                                       |
|                                                               | 5c      | Role of study sponsor and funders, if any, in study design; collection, management, analysis, and interpretation of data; writing of the report; and the decision to submit the report for publication, including whether they will have ultimate authority over any of these activities |
|                                                               | 5d      | Composition, roles, and responsibilities of the coordinating centre, steering committee, endpoint adjudication committee, data management team, and other individuals or groups overseeing the trial, if applicable (see Item 21a for data monitoring committee)                         |
| <b>Introduction</b>                                           |         |                                                                                                                                                                                                                                                                                          |
| Background and rationale (P 4/line 91)                        | 6a      | Description of research question and justification for undertaking the trial, including summary of relevant studies (published and unpublished) examining benefits and harms for each intervention                                                                                       |
|                                                               | 6b      | Explanation for choice of comparators                                                                                                                                                                                                                                                    |
| Objectives (P 5/line 132)                                     | 7       | Specific objectives or hypotheses                                                                                                                                                                                                                                                        |

1  
2 Trial design (P 8 Description of trial design including type of trial (eg, parallel group,  
3 6/line 147) crossover, factorial, single group), allocation ratio, and framework (eg,  
4 superiority, equivalence, noninferiority, exploratory)  
5  
6  
7

8 **Methods: Participants, interventions, and outcomes**  
9

10 Study setting (P 9 Description of study settings (eg, community clinic, academic hospital)  
11 6/line 147) and list of countries where data will be collected. Reference to where  
12 list of study sites can be obtained  
13

14 Eligibility criteria 10 Inclusion and exclusion criteria for participants. If applicable, eligibility  
15 (P 6/line 156) criteria for study centres and individuals who will perform the  
16 interventions (eg, surgeons, psychotherapists)  
17

18 Interventions (P 11a Interventions for each group with sufficient detail to allow replication,  
19 8/line 211) including how and when they will be administered  
20  
21

22 11b Criteria for discontinuing or modifying allocated interventions for a  
23 given trial participant (eg, drug dose change in response to harms,  
24 participant request, or improving/worsening disease)  
25

26 11c Strategies to improve adherence to intervention protocols, and any  
27 procedures for monitoring adherence (eg, drug tablet return,  
28 laboratory tests)  
29

30 11d Relevant concomitant care and interventions that are permitted or  
31 prohibited during the trial  
32  
33

34 Outcomes (P 12 Primary, secondary, and other outcomes, including the specific  
35 9/line 242) measurement variable (eg, systolic blood pressure), analysis metric  
36 (eg, change from baseline, final value, time to event), method of  
37 aggregation (eg, median, proportion), and time point for each  
38 outcome. Explanation of the clinical relevance of chosen efficacy and  
39 harm outcomes is strongly recommended  
40  
41

42 Participant 13 Time schedule of enrolment, interventions (including any run-ins and  
43 timeline (P 10/line washouts), assessments, and visits for participants. A schematic  
44 257) diagram is highly recommended (see Figure)  
45  
46

47 Sample size (P 14 Estimated number of participants needed to achieve study objectives  
48 11/line 299) and how it was determined, including clinical and statistical  
49 assumptions supporting any sample size calculations  
50

51 Recruitment (P 15 Strategies for achieving adequate participant enrolment to reach  
52 7/line 181) target sample size  
53  
54

55 **Methods: Assignment of interventions (for controlled trials)**  
56

57 Allocation: (P  
58 7/line 190)  
59  
60

|    |                |     |                                                                         |
|----|----------------|-----|-------------------------------------------------------------------------|
| 1  |                |     |                                                                         |
| 2  | Sequence       | 16a | Method of generating the allocation sequence (eg, computer-             |
| 3  | generation     |     | generated random numbers), and list of any factors for stratification.  |
| 4  |                |     | To reduce predictability of a random sequence, details of any planned   |
| 5  |                |     | restriction (eg, blocking) should be provided in a separate document    |
| 6  |                |     | that is unavailable to those who enrol participants or assign           |
| 7  |                |     | interventions                                                           |
| 8  |                |     |                                                                         |
| 9  |                |     |                                                                         |
| 10 | Allocation     | 16b | Mechanism of implementing the allocation sequence (eg, central          |
| 11 | concealment    |     | telephone; sequentially numbered, opaque, sealed envelopes),            |
| 12 | mechanism      |     | describing any steps to conceal the sequence until interventions are    |
| 13 |                |     | assigned                                                                |
| 14 |                |     |                                                                         |
| 15 | Implementation | 16c | Who will generate the allocation sequence, who will enrol participants, |
| 16 |                |     | and who will assign participants to interventions                       |
| 17 |                |     |                                                                         |
| 18 |                |     |                                                                         |
| 19 | Blinding       | 17a | Who will be blinded after assignment to interventions (eg, trial        |
| 20 | (masking)      |     | participants, care providers, outcome assessors, data analysts), and    |
| 21 |                |     | how                                                                     |
| 22 |                |     |                                                                         |
| 23 |                | 17b | If blinded, circumstances under which unblinding is permissible, and    |
| 24 |                |     | procedure for revealing a participant's allocated intervention during   |
| 25 |                |     | the trial                                                               |
| 26 |                |     |                                                                         |
| 27 |                |     |                                                                         |

### Methods: Data collection, management, and analysis

|    |                 |     |                                                                          |
|----|-----------------|-----|--------------------------------------------------------------------------|
| 28 |                 |     |                                                                          |
| 29 |                 |     |                                                                          |
| 30 | Data collection | 18a | Plans for assessment and collection of outcome, baseline, and other      |
| 31 | methods (P      |     | trial data, including any related processes to promote data quality (eg, |
| 32 | 10/line 259)    |     | duplicate measurements, training of assessors) and a description of      |
| 33 |                 |     | study instruments (eg, questionnaires, laboratory tests) along with      |
| 34 |                 |     | their reliability and validity, if known. Reference to where data        |
| 35 |                 |     | collection forms can be found, if not in the protocol                    |
| 36 |                 |     |                                                                          |
| 37 |                 |     |                                                                          |
| 38 |                 | 18b | Plans to promote participant retention and complete follow-up,           |
| 39 |                 |     | including list of any outcome data to be collected for participants who  |
| 40 |                 |     | discontinue or deviate from intervention protocols                       |
| 41 |                 |     |                                                                          |
| 42 | Data            | 19  | Plans for data entry, coding, security, and storage, including any       |
| 43 | management (P   |     | related processes to promote data quality (eg, double data entry;        |
| 44 | 13/ line 349)   |     | range checks for data values). Reference to where details of data        |
| 45 |                 |     | management procedures can be found, if not in the protocol               |
| 46 |                 |     |                                                                          |
| 47 |                 |     |                                                                          |
| 48 | Statistical     | 20a | Statistical methods for analysing primary and secondary outcomes.        |
| 49 | methods (P      |     | Reference to where other details of the statistical analysis plan can be |
| 50 | 14/line 357)    |     | found, if not in the protocol                                            |
| 51 |                 |     |                                                                          |
| 52 |                 |     |                                                                          |
| 53 |                 | 20b | Methods for any additional analyses (eg, subgroup and adjusted           |
| 54 |                 |     | analyses)                                                                |
| 55 |                 |     |                                                                          |
| 56 |                 | 20c | Definition of analysis population relating to protocol non-adherence     |
| 57 |                 |     | (eg, as randomised analysis), and any statistical methods to handle      |
| 58 |                 |     | missing data (eg, multiple imputation)                                   |
| 59 |                 |     |                                                                          |
| 60 |                 |     |                                                                          |





- 1  
2  
3  
4  
5  
6  
7  
8  
9  
10  
11  
12  
13
- |                                            |     |                                                                                                                                                                                                                                                                                     |
|--------------------------------------------|-----|-------------------------------------------------------------------------------------------------------------------------------------------------------------------------------------------------------------------------------------------------------------------------------------|
| Dissemination<br>policy (P 12/line<br>323) | 31a | Plans for investigators and sponsor to communicate trial results to participants, healthcare professionals, the public, and other relevant groups (eg, via publication, reporting in results databases, or other data sharing arrangements), including any publication restrictions |
|                                            | 31b | Authorship eligibility guidelines and any intended use of professional writers                                                                                                                                                                                                      |
|                                            | 31c | Plans, if any, for granting public access to the full protocol, participant-level dataset, and statistical code                                                                                                                                                                     |

## 14 Appendices

- 15  
16  
17  
18  
19  
20  
21  
22  
23  
24  
25
- |                                                          |    |                                                                                                                                                                                                |
|----------------------------------------------------------|----|------------------------------------------------------------------------------------------------------------------------------------------------------------------------------------------------|
| Informed consent<br>materials<br>(supplementary<br>file) | 32 | Model consent form and other related documentation given to participants and authorised surrogates                                                                                             |
| Biological<br>specimens                                  | 33 | Plans for collection, laboratory evaluation, and storage of biological specimens for genetic or molecular analysis in the current trial and for future use in ancillary studies, if applicable |

---

26 \*It is strongly recommended that this checklist be read in conjunction with the SPIRIT 2013  
27 Explanation & Elaboration for important clarification on the items. Amendments to the  
28 protocol should be tracked and dated. The SPIRIT checklist is copyrighted by the SPIRIT  
29 Group under the Creative Commons "[Attribution-NonCommercial-NoDerivs 3.0 Unported](#)"  
30 license.  
31  
32  
33  
34  
35  
36  
37  
38  
39  
40  
41  
42  
43  
44  
45  
46  
47  
48  
49  
50  
51  
52  
53  
54  
55  
56  
57  
58  
59  
60
